# Supplementary material for: Sleep Deprivation Alters the Pituitary Stress Transcriptome in Male and Female Mice
Source: Front Endocrinol (Lausanne). 2019 Oct 9;10:676. doi: 10.3389/fendo.2019.00676 (PMC6794367; doi:10.3389/fendo.2019.00676)
Supplement: Supplementary Dataset 1 — Excel workbook contains results from performed analyses considering male and female mice separately, the “sex” term was dropped while retaining the same contrast definition for the main treatment effects. Per contrast, genes with mean TPM expression levels greater than or equal to one across the cohort were considered differentially expressed if their estimated adjusted p-values were ≤0.05 and if the absolute value of their log2 fold-changes following shrinkage (i.e., using the lfcShrink function in DESeq2) were ≥0.322. [file Data_Sheet_1.xlsx]

## Sheet: Male_NoRest_PSD_vs_NoRest_NoPSD
Gene	baseMean	log2FoldChange	stat	pvalue	padj
Aldh1l2	694.354	0.76988	7.62397	2.45998e-14	3.86758e-10
Gadd45b	1072.47	0.801346	6.57335	4.91951e-11	3.86722e-07
Aplnr	297.791	-0.688423	-5.96459	2.45248e-09	1.28526e-05
Fam46a	5602.14	0.623859	5.81178	6.18134e-09	2.42958e-05
AK131586	161726	-0.351047	-5.69902	1.20501e-08	3.64329e-05
Nrip2	208.05	0.627081	5.66366	1.48179e-08	3.64329e-05
Loxl1	1507.07	-0.414377	-5.64812	1.62212e-08	3.64329e-05
Mthfd2	1322.95	0.482933	5.50477	3.69657e-08	6.75867e-05
Begain	918.245	-0.413252	-5.49673	3.86897e-08	6.75867e-05
DQ539915	387243	-0.367999	-5.3667	8.01884e-08	0.000126072
Ctss	1008.33	-0.481961	-5.30534	1.12464e-07	0.000160742
Cyb5r1	1209.27	0.460033	5.23099	1.68608e-07	0.000217708
X57780	145149	-0.364826	-5.10741	3.26599e-07	0.000366771
Basp1	1167.02	-0.484579	-5.09313	3.52202e-07	0.000369155
Mir1906-1	1581.1	0.336842	5.07999	3.77449e-07	0.000370891
AK131579	174485	-0.390665	-5.0389	4.68216e-07	0.000433017
BC069931	175542	-0.384758	-4.90801	9.20036e-07	0.000761306
AK082064	389.022	-0.561698	-4.87424	1.09226e-06	0.000858623
Pcdha12	241.562	0.54257	4.80192	1.57153e-06	0.00117655
Rps26	2955.55	-0.337539	-4.78786	1.68572e-06	0.00120467
Slc37a2	318.992	0.53915	4.69043	2.72633e-06	0.00186362
Egr3	152.666	0.505408	4.65865	3.18284e-06	0.00208503
Ryr3	310.08	0.603029	4.64337	3.42779e-06	0.00215567
Rpl27	1382.37	-0.361921	-4.62012	3.8352e-06	0.00231911
Psat1	950.819	0.444069	4.57346	4.79725e-06	0.00279342
Serpinb11	323.596	0.417005	4.53081	5.87568e-06	0.00329919
H2-Ab1	1160.55	-0.46756	-4.52069	6.1638e-06	0.00333115
Atp5e	3563.96	0.3897	4.51418	6.35635e-06	0.00333115
AK140265	4913.56	-0.426762	-4.44361	8.84605e-06	0.00448638
Pcsk1n	18010.3	-0.531729	-4.3979	1.09302e-05	0.00537013
Mthfd1l	319.192	0.514188	4.36197	1.28896e-05	0.00596031
Eif4ebp1	379.242	0.486563	4.3437	1.40102e-05	0.00629338
Prr7	167.848	-0.493185	-4.30741	1.6518e-05	0.00721376
Angptl6	420.488	0.450675	4.23729	2.26229e-05	0.00935993
Irf7	287.847	0.474129	4.22954	2.34169e-05	0.00944
Syn1	1572.76	-0.338712	-4.20133	2.65351e-05	0.0104296
Cd74	3237.73	-0.47753	-4.18705	2.82603e-05	0.0108368
BC049805	607.741	-0.334202	-4.16464	3.11841e-05	0.0114018
AF050165	139.581	-0.505366	-4.13897	3.48876e-05	0.0121631
C230071H18Rik	216.053	0.497628	4.13158	3.60281e-05	0.0121631
Fam212b	1316.69	0.371557	4.12235	3.75024e-05	0.0121631
Serpina3n	153.931	0.42493	4.11987	3.7908e-05	0.0121631
Bdnf	516.83	0.497301	4.09314	4.25573e-05	0.0133817
H2afx	489.95	-0.371551	-4.06615	4.77953e-05	0.0147341
Nmb	430.708	0.52905	4.05748	4.96043e-05	0.0149977
Kif12	125.854	0.496067	4.04253	5.28784e-05	0.0154718
Whrn	2976.35	-0.352593	-4.04137	5.31405e-05	0.0154718
Cd38	181.005	-0.451335	-4.03219	5.52597e-05	0.0155274
Slc7a3	199.368	0.434986	3.99676	6.42144e-05	0.0171903
Dapk1	1185.92	-0.331992	-3.99567	6.45103e-05	0.0171903
Foxo6	438.23	-0.386328	-3.99062	6.58997e-05	0.0172559
Krt8	2068.63	0.334162	3.98687	6.69514e-05	0.0172559
Fstl3	186.216	-0.464114	-3.96496	7.34085e-05	0.0178553
Gsn	3145.12	0.345633	3.96363	7.38196e-05	0.0178553
AK142750	138156	-0.345831	-3.95536	7.64183e-05	0.0179973
Tagln	397.903	0.451225	3.9545	7.66963e-05	0.0179973
Pyroxd2	372.598	0.353724	3.93863	8.19495e-05	0.0187756
Laptm5	323.256	-0.392695	-3.93731	8.24016e-05	0.0187756
AK163440	45751.1	-0.350765	-3.90994	9.23189e-05	0.0207348
Mfge8	5184.65	0.372316	3.90502	9.42181e-05	0.0208633
H2-Aa	1652.2	-0.430759	-3.88395	0.000102775	0.021592
Pck2	1991.32	0.375879	3.8726	0.000107679	0.0222755
Rab6b	1782.2	-0.353857	-3.82306	0.000131808	0.0265677
AK018753	78601.8	-0.339298	-3.81278	0.00013741	0.0273464
H2-Eb1	1206.75	-0.394828	-3.78007	0.000156784	0.0304316
Banp	853.958	-0.359111	-3.74429	0.000180902	0.0338587
AK047101	86.6142	-0.452251	-3.71237	0.000205327	0.0366835
Lcn2	2473.21	0.415087	3.70142	0.000214395	0.0374525
Lbh	1434.57	0.34605	3.68004	0.000233197	0.0402892
Rgs2	2892.19	0.38238	3.67219	0.000240484	0.0406548
Bub1b	188.418	0.464595	3.64476	0.000267638	0.0442927
Sox18	94.6563	-0.480643	-3.62458	0.000289428	0.0469112
4930413G21Rik	369.235	-0.43295	-3.61695	0.000298093	0.0478226
Gm16062	134.9	0.441607	3.60571	0.000311298	0.0489423

## Sheet: Male_Rest_NoPSD_vs_NoRest_NoPSD
Gene	baseMean	log2FoldChange	stat	pvalue	padj
Egr3	152.666	1.37392	10.8524	1.9417e-27	3.59856e-23
Fam212b	1316.69	0.981109	10.2508	1.17337e-24	1.0873e-20
Gadd45b	1072.47	1.18406	9.01528	1.96363e-19	1.21306e-15
Errfi1	1576.38	1.1015	8.31494	9.17968e-17	4.25318e-13
Arc	527.144	1.10835	8.26372	1.41198e-16	5.23365e-13
Fam46a	5602.14	0.924344	7.9395	2.02991e-15	6.27004e-12
B3galt2	453.356	0.970842	7.35502	1.90905e-13	5.05434e-10
Trib1	772.133	0.840641	7.33222	2.26369e-13	5.24411e-10
Nr4a1	14460.3	0.409431	7.05825	1.68609e-12	3.47203e-09
Npas4	710.364	0.922828	7.00466	2.47595e-12	4.58867e-09
Dnajb1	1751	0.817912	6.95181	3.6063e-12	6.07596e-09
Atf3	271.98	0.65657	6.85199	7.28278e-12	1.12477e-08
AK085136	3348.19	0.558273	6.70043	2.07805e-11	2.9625e-08
Mir335	55.5182	0.853034	6.6154	3.70552e-11	4.90531e-08
Nfkbiz	521.775	0.751557	6.43148	1.26364e-10	1.56127e-07
C230071H18Rik	216.053	0.817548	6.41759	1.38451e-10	1.6037e-07
Ptp4a1	2834.64	0.712621	6.33688	2.34469e-10	2.55613e-07
AK017280	1157.14	0.630707	6.31152	2.76303e-10	2.72297e-07
Junb	3658.02	0.647843	6.30993	2.79158e-10	2.72297e-07
Fosb	625.777	0.441387	6.29845	3.0064e-10	2.78588e-07
AK045867	90.1778	0.812091	6.09561	1.09023e-09	9.62158e-07
Tob1	2612.79	0.622105	6.00969	1.85877e-09	1.56584e-06
Peg10	2148.64	0.622638	5.76686	8.07624e-09	6.33277e-06
Dusp5	104.154	0.777837	5.76156	8.33417e-09	6.33277e-06
Clk1	5286.71	0.491932	5.75739	8.54256e-09	6.33277e-06
Il1b	57.4163	0.744786	5.65937	1.51931e-08	1.04436e-05
Ddit4	1770.05	0.491728	5.65912	1.52148e-08	1.04436e-05
Nr4a2	5171.65	0.368928	5.56938	2.55643e-08	1.69208e-05
Gem	1343.55	0.44878	5.55007	2.85558e-08	1.82491e-05
Ccnl1	2674.59	0.389015	5.53909	3.04055e-08	1.87835e-05
Egr1	3618.49	0.362489	5.39181	6.97507e-08	4.09331e-05
Zc3h12c	785.846	0.557549	5.38944	7.06771e-08	4.09331e-05
Mest	19663.5	0.654428	5.37237	7.77077e-08	4.36411e-05
Cebpd	1210.22	0.641716	5.29398	1.19683e-07	6.52375e-05
AK021342	82.2584	0.705734	5.25936	1.4456e-07	7.65468e-05
Nap1l5	7813.23	0.503984	5.2507	1.5152e-07	7.80032e-05
B230216N24Rik	181.799	0.698249	5.16469	2.40837e-07	0.000120634
Bhlha15	1782.84	0.524488	5.14758	2.6387e-07	0.000128692
Tob2	1046.11	0.509158	5.05622	4.27639e-07	0.000203216
Hspa1b	790.523	0.626625	5.00785	5.50408e-07	0.000255018
Hspa1a	837.464	0.622031	4.95495	7.23483e-07	0.000327032
Phlda1	348.241	0.583288	4.90758	9.22055e-07	0.000406868
Fgfbp3	249.688	0.644598	4.87085	1.11119e-06	0.000478922
Gm29766	276.27	0.578702	4.85102	1.22831e-06	0.000517368
Egr4	77.8378	0.39979	4.78124	1.74217e-06	0.000717502
Emd	3018.66	0.526548	4.74476	2.08754e-06	0.000841054
Slc38a2	4035.26	0.416113	4.73898	2.14799e-06	0.000846992
Bcl2l11	888.018	0.453811	4.72345	2.31881e-06	0.000895303
Odc1	8806.28	0.450079	4.68173	2.84463e-06	0.00107591
Dusp1	2463.95	0.447468	4.65059	3.30989e-06	0.00122684
Prdm1	130.69	0.600182	4.62733	3.70404e-06	0.00134602
Tiparp	915.783	0.615749	4.55825	5.15821e-06	0.0018384
Btg2	7027.69	0.608161	4.53653	5.71883e-06	0.00199975
Rgs2	2892.19	0.512213	4.52078	6.16112e-06	0.00211452
AK154258	166.757	-0.599443	-4.47978	7.47194e-06	0.00247281
Sik1	1789.24	0.382041	4.44056	8.97259e-06	0.00291735
Zfp36l2	1536.7	0.47543	4.42508	9.64058e-06	0.0030805
AK145129	642.156	0.571671	4.35819	1.31145e-05	0.00405086
Slc25a25	3142.82	0.595368	4.28315	1.84265e-05	0.00559833
Ppp1r15a	1753.44	0.474591	4.20252	2.63964e-05	0.0078284
AK082338	65.3638	-0.543542	-4.20068	2.66114e-05	0.0078284
Xkr6	138.918	0.536223	4.16983	3.04828e-05	0.00869134
Mcl1	3025.15	0.338382	4.14219	3.4401e-05	0.00951573
Dusp14	2211.68	0.572542	4.13138	3.6059e-05	0.00982767
Zfp36	638.569	0.513937	4.11028	3.95185e-05	0.0106144
Gm6225	186.733	0.507803	4.09908	4.14789e-05	0.010838
AK216824	663.77	0.53104	4.09885	4.15202e-05	0.010838
Mat2a	5258.7	0.414999	4.05171	5.08439e-05	0.0130874
Mxd1	718.718	0.340059	4.02172	5.7774e-05	0.0141306
Vps37b	796.506	0.480848	4.02102	5.79466e-05	0.0141306
Ier2	816.161	0.534544	4.00936	6.08835e-05	0.014654
Fam110a	699.172	0.476867	3.94323	8.03903e-05	0.0186486
Dos	10588.2	0.51029	3.94291	8.04992e-05	0.0186486
Amigo2	1386.48	0.435036	3.92033	8.84266e-05	0.0202322
Gpr149	371.669	-0.413943	-3.91625	8.99366e-05	0.0203268
AK205396	250.442	0.506804	3.90854	9.28566e-05	0.0207339
Ccdc117	868.365	0.349596	3.89686	9.74481e-05	0.0215001
BC094052	475.022	0.358295	3.87093	0.00010842	0.0236393
Cbln1	709.179	-0.382344	-3.85818	0.000114234	0.0246174
Ide	2645.74	0.48781	3.83191	0.000127153	0.0270864
Irs2	1179.95	0.51099	3.82086	0.000132988	0.0280077
Grasp	142.992	0.508863	3.80073	0.000144268	0.029708
Nrep	1621.83	-0.338769	-3.79663	0.000146676	0.0298719
Ypel4	1170.36	0.377156	3.76773	0.000164737	0.0328286
Jrk	374.162	-0.358392	-3.73501	0.000187705	0.0370079
C2cd4b	194.997	0.460423	3.71644	0.00020205	0.0390062
Fem1c	952.904	0.373645	3.70821	0.000208732	0.0398807
Klf4	157.13	0.48068	3.69486	0.000220006	0.0416058
Siah2	449.724	0.479815	3.67991	0.000233313	0.0436767
5330429B09Rik_	931.518	0.419376	3.67419	0.000238606	0.0442208
Nfil3	667.948	0.50319	3.66499	0.000247353	0.045388
Gper1	1335.21	0.343293	3.65539	0.00025679	0.0466577
Nfkbia	1528.01	0.382757	3.65107	0.000261146	0.0469886

## Sheet: Male_Rest_PSD_vs_NoRest_NoPSD
Gene	baseMean	log2FoldChange	stat	pvalue	padj
Fam212b	1316.69	1.61771	18.8873	1.45051e-79	2.55232e-75
Gadd45b	1072.47	1.69425	13.997	1.6268e-44	1.43126e-40
Errfi1	1576.38	1.55922	12.5007	7.40072e-36	4.34077e-32
Fam46a	5602.14	1.20862	11.4932	1.42741e-30	6.27919e-27
Egr3	152.666	1.39896	11.4344	2.81383e-30	9.90245e-27
Odc1	8806.28	0.935488	11.1102	1.11958e-28	3.28334e-25
B3galt2	453.356	1.35241	10.9702	5.31418e-28	1.33583e-24
Aldh1l2	694.354	0.957779	9.4484	3.44047e-21	7.5673e-18
Atf3	271.98	0.98347	9.38581	6.24318e-21	1.22061e-17
Nfkbiz	521.775	0.986009	9.16754	4.8394e-20	8.5154e-17
Mest	19663.5	0.980607	8.87393	7.06119e-19	1.12953e-15
Ptp4a1	2834.64	0.884473	8.57907	9.56453e-18	1.40248e-14
Npas4	710.364	1.08373	8.50795	1.7703e-17	2.39617e-14
C230071H18Rik	216.053	1.00807	8.4879	2.10413e-17	2.64459e-14
Fam13c	1077.97	1.02796	8.37731	5.41509e-17	6.35226e-14
Ier3	152.864	1.03746	8.34067	7.38712e-17	8.12398e-14
Nr4a1	14460.3	0.498619	8.27131	1.32493e-16	1.37138e-13
Kif18a	230.576	1.01561	8.15413	3.51705e-16	3.43812e-13
Emd	3018.66	0.807121	8.05011	8.27196e-16	7.6607e-13
Zc3h12c	785.846	0.748707	7.98532	1.40161e-15	1.23314e-12
Gem	1343.55	0.709675	7.86215	3.77601e-15	3.16394e-12
B230216N24Rik	181.799	0.982532	7.81685	5.41597e-15	4.33179e-12
Gprc5a	108.575	1.0306	7.77923	7.2969e-15	5.58244e-12
Mat2a	5258.7	0.699151	7.7206	1.15781e-14	8.48867e-12
Trib1	772.133	0.825099	7.69458	1.41964e-14	9.992e-12
Arc	527.144	0.978371	7.66635	1.76965e-14	1.19765e-11
Dusp5	104.154	0.963762	7.41874	1.18236e-13	7.70548e-11
Aplnr	297.791	-0.866375	-7.40485	1.31303e-13	8.25144e-11
Gper1	1335.21	0.61252	7.39121	1.45495e-13	8.82806e-11
Atl2	1771.64	0.483902	7.32528	2.38397e-13	1.39828e-10
Fosb	625.777	0.518633	7.20909	5.63291e-13	3.19731e-10
Ctgf	630.243	0.771493	7.14493	9.00395e-13	4.95105e-10
Cpeb4	2630.57	0.67649	7.08004	1.44113e-12	7.68428e-10
Dusp14	2211.68	0.929904	7.06971	1.55258e-12	8.03506e-10
Nr4a2	5171.65	0.508927	7.00175	2.52777e-12	1.27082e-09
AK021342	82.2584	0.911431	6.9686	3.20107e-12	1.56461e-09
Il1b	57.4163	0.913147	6.96466	3.29208e-12	1.56561e-09
Dos	10588.2	0.801112	6.85219	7.27288e-12	3.35092e-09
Vps37b	796.506	0.746859	6.84919	7.42703e-12	3.35092e-09
Syt4	11333.3	0.609968	6.76435	1.33908e-11	5.74692e-09
Lcn2	2473.21	0.740304	6.69763	2.11831e-11	8.87472e-09
Nap1l5	7813.23	0.581377	6.68424	2.32131e-11	9.499e-09
Trmt61b	381.054	0.78471	6.66937	2.56898e-11	1.02736e-08
Mir335	55.5182	0.834124	6.65007	2.92961e-11	1.14554e-08
AK045867	90.1778	0.865987	6.61821	3.63574e-11	1.39075e-08
Nrip2	208.05	0.740399	6.59918	4.13427e-11	1.5478e-08
Srrm4	1312.6	0.678404	6.59501	4.25219e-11	1.55878e-08
Tinf2	1133.02	0.759372	6.59172	4.34752e-11	1.5612e-08
Col17a1	290.401	0.757404	6.55409	5.59835e-11	1.97017e-08
AK017280	1157.14	0.600128	6.53104	6.53136e-11	2.25345e-08
Shisa2	285.149	0.718679	6.50836	7.59761e-11	2.57092e-08
Prdm1	130.69	0.789756	6.48987	8.59079e-11	2.85214e-08
Nfil3	667.948	0.822909	6.47194	9.67546e-11	3.15277e-08
Inpp5f	2731.62	0.58831	6.43541	1.23138e-10	3.93953e-08
Socs7	1736.3	0.393612	6.42878	1.28634e-10	4.04187e-08
Tiparp	915.783	0.796715	6.38453	1.7193e-10	5.30752e-08
AK216824	663.77	0.76642	6.37631	1.81407e-10	5.50351e-08
Junb	3658.02	0.616699	6.36536	1.94829e-10	5.81053e-08
Slc25a25	3142.82	0.820158	6.31509	2.70005e-10	7.91834e-08
Ipmk	599.477	0.485288	6.29517	3.07056e-10	8.85732e-08
Bcor	1307.57	0.47209	6.29153	3.14355e-10	8.9216e-08
Fam131a	2501.25	0.611599	6.28611	3.25523e-10	9.09191e-08
Pde4b	710.543	0.645073	6.25848	3.88759e-10	1.06884e-07
Cish	1342.82	0.444934	6.17061	6.80287e-10	1.81369e-07
Ccnl1	2674.59	0.389546	6.13311	8.61779e-10	2.26326e-07
Tagln	397.903	0.691195	6.08556	1.16082e-09	3.00378e-07
BC057675	568.989	0.784789	6.07495	1.24027e-09	3.16288e-07
Ppp1r15a	1753.44	0.618821	6.06988	1.28007e-09	3.21774e-07
Bdnf	516.83	0.729796	6.02942	1.64545e-09	4.07794e-07
Calca	39.3604	0.782427	5.99813	1.99599e-09	4.87798e-07
Sec14l1	3175.3	0.486031	5.97866	2.24983e-09	5.42301e-07
Camk2n2	993.553	0.62792	5.92813	3.06396e-09	7.2856e-07
Rnd1	210.275	0.733637	5.9126	3.36743e-09	7.90044e-07
Zfp39	520.505	-0.583347	-5.88585	3.96019e-09	9.16889e-07
AK205396	250.442	0.714416	5.85669	4.7218e-09	1.07902e-06
Josd1	1213.52	0.515653	5.84486	5.07007e-09	1.14376e-06
Fam110a	699.172	0.641529	5.84095	5.19044e-09	1.15609e-06
Psat1	950.819	0.566566	5.81667	6.00332e-09	1.32043e-06
Tmem198	1101.87	0.697893	5.80515	6.43099e-09	1.39703e-06
Maff	110.284	0.757384	5.78437	7.27847e-09	1.56185e-06
Cbln1	709.179	-0.52028	-5.78129	7.41321e-09	1.5716e-06
Arid4a	1283.1	-0.388515	-5.77917	7.5069e-09	1.57252e-06
Erf	1252.66	0.633099	5.72966	1.00635e-08	2.08325e-06
Nmb	430.708	0.751218	5.72156	1.05548e-08	2.15956e-06
Ypel4	1170.36	0.517763	5.70429	1.16827e-08	2.36285e-06
Tat	53.9462	0.720182	5.69788	1.21307e-08	2.42559e-06
Gmpr2	1218.25	0.478916	5.69176	1.25733e-08	2.48585e-06
Crem	2601.63	0.74793	5.67994	1.34743e-08	2.63437e-06
Rap2a	1149.74	0.559178	5.67337	1.40019e-08	2.70744e-06
Avpi1	409.168	0.577582	5.65917	1.5211e-08	2.90926e-06
Amigo2	1386.48	0.567449	5.63583	1.74222e-08	3.29635e-06
Dnajb1	1751	0.625526	5.63329	1.76801e-08	3.30957e-06
Fam65a	1452.25	0.524029	5.59562	2.19835e-08	4.0718e-06
Slc6a11	1743.56	-0.658143	-5.57577	2.46437e-08	4.51698e-06
Rgs2	2892.19	0.569038	5.53021	3.19839e-08	5.80195e-06
Sft2d2	3837.01	0.57164	5.51985	3.39298e-08	6.09213e-06
Nrep	1621.83	-0.445231	-5.51423	3.50311e-08	6.20935e-06
Mettl17	968.302	-0.366213	-5.51294	3.52884e-08	6.20935e-06
AK154258	166.757	-0.697066	-5.49741	3.85415e-08	6.71462e-06
Pard6a	914.494	0.666354	5.49554	3.89516e-08	6.71953e-06
AK085136	3348.19	0.417257	5.48136	4.22071e-08	7.21045e-06
Bag3	1077.94	0.655873	5.46743	4.56603e-08	7.72537e-06
Syt13	3552.67	0.550524	5.42892	5.6695e-08	9.46341e-06
Cln8	721.39	0.415484	5.42794	5.70085e-08	9.46341e-06
Dapk1	1185.92	-0.456719	-5.42077	5.93418e-08	9.75868e-06
Trim67	268.599	0.65645	5.37561	7.63241e-08	1.24352e-05
Nab2	1344.64	0.611246	5.37225	7.77602e-08	1.25529e-05
Clic4	1696.69	0.382209	5.36258	8.20431e-08	1.30057e-05
Mcl1	3025.15	0.393411	5.35035	8.77833e-08	1.37914e-05
Parp16	356.762	-0.493659	-5.34307	9.13869e-08	1.42305e-05
Lonrf1	619.436	0.495499	5.3376	9.41833e-08	1.45373e-05
Per2	1441.98	0.491877	5.33084	9.77574e-08	1.49577e-05
Traf4	558.549	0.527831	5.32219	1.02524e-07	1.55518e-05
Gm29766	276.27	0.598393	5.31059	1.09271e-07	1.63248e-05
Ifrd1	2080.04	0.625145	5.31025	1.09475e-07	1.63248e-05
Bhlha15	1782.84	0.495433	5.25707	1.46368e-07	2.16428e-05
Arrdc3	2117.46	-0.498804	-5.2541	1.48746e-07	2.18112e-05
Dhrs1	1969.09	0.4147	5.25068	1.51538e-07	2.20369e-05
Cidea	1311.03	0.606458	5.24615	1.5531e-07	2.24003e-05
Exph5	512	-0.48102	-5.23326	1.66547e-07	2.38257e-05
Vgf	662.165	0.673476	5.21807	1.80802e-07	2.56564e-05
Foxj1	154.203	0.57277	5.20261	1.96513e-07	2.76627e-05
Pmvk	1284.14	0.497762	5.18561	2.15313e-07	2.97428e-05
Serpinb11	323.596	0.505847	5.1847	2.16361e-07	2.97428e-05
Gpr149	371.669	-0.505678	-5.15149	2.58432e-07	3.52509e-05
Egr4	77.8378	0.427234	5.12223	3.01938e-07	4.08684e-05
Fem1c	952.904	0.459961	5.05064	4.40331e-07	5.91456e-05
Mirlet7bhg	159.202	-0.572779	-5.0399	4.65784e-07	6.20905e-05
Rgs9	5387.77	0.337404	5.03142	4.86867e-07	6.44129e-05
Amer2	525.076	0.573885	5.02772	4.96347e-07	6.5177e-05
Tgif1	300.214	0.493162	5.01947	5.18134e-07	6.70375e-05
Zbtb21	903.025	0.528655	5.00832	5.49082e-07	7.0523e-05
Usp2	2193.07	0.429493	5.00602	5.55663e-07	7.08511e-05
Sik1	1789.24	0.422001	4.99964	5.74377e-07	7.27103e-05
Mllt11	1213.78	0.346847	4.99325	5.93704e-07	7.46202e-05
Cebpd	1210.22	0.576583	4.98608	6.16151e-07	7.68921e-05
Zfp97	382.876	-0.461999	-4.97056	6.67614e-07	8.27277e-05
Cyb5r1	1209.27	0.441635	4.96491	6.87315e-07	8.45734e-05
Clu	24375	0.578974	4.93543	7.99739e-07	9.77237e-05
Tenm2	277.066	0.553413	4.93117	8.17366e-07	9.91888e-05
Golph3l	2416.8	-0.429286	-4.92522	8.42652e-07	0.000101557
Zfp386	1438.03	-0.334528	-4.91927	8.68697e-07	0.000103984
Lgals1	1143.87	0.548241	4.91593	8.8363e-07	0.000105056
Mfap4	353.125	-0.542044	-4.90595	9.29745e-07	0.000109797
Spry4	181.5	0.642058	4.89508	9.82675e-07	0.000114511
Slc3a2	3782.27	0.466639	4.89055	1.00556e-06	0.000116407
Bcl2l11	888.018	0.433639	4.87754	1.07415e-06	0.000123534
Map3k19	277.88	0.617516	4.84762	1.24951e-06	0.000142768
Slc7a3	199.368	0.55041	4.84241	1.28277e-06	0.000145623
Pde1a	782.536	0.503176	4.83924	1.30335e-06	0.000147011
Ryr3	310.08	0.630556	4.83762	1.314e-06	0.000147269
Krt8	2068.63	0.406907	4.83598	1.32489e-06	0.000147549
Midn	3185.07	0.632968	4.83245	1.34864e-06	0.000149249
Scn5a	1253.7	-0.464804	-4.80398	1.55545e-06	0.000169998
Gm12750	1536.23	-0.397715	-4.80196	1.5712e-06	0.000170659
Itprip	362.76	0.624048	4.79014	1.66666e-06	0.000178068
Lbh	1434.57	0.450806	4.78951	1.67188e-06	0.000178068
Ccl7	17.2995	0.531914	4.78739	1.6896e-06	0.000178068
N4bp2l1	894.98	0.524293	4.78203	1.73538e-06	0.000180869
5730403I07Rik	658.503	-0.536769	-4.78182	1.73715e-06	0.000180869
Rab6a	2903.98	0.404486	4.77787	1.77161e-06	0.000183308
Thbs1	352.706	0.569964	4.77653	1.78342e-06	0.000183308
Siah2	449.724	0.575789	4.77559	1.79183e-06	0.000183308
Dapl1	908.211	-0.537132	-4.76169	1.91974e-06	0.000193027
Gpr3	38.0506	0.545477	4.75924	1.94326e-06	0.000193751
Mthfd2	1322.95	0.423241	4.75865	1.94896e-06	0.000193751
Anxa1	208.611	0.531996	4.75647	1.97007e-06	0.000194749
Mgll	1561.53	-0.407683	-4.73878	2.1501e-06	0.000210184
Fosl2	5490.06	0.350455	4.72082	2.34899e-06	0.000228359
Adamts1	443.031	0.588181	4.71904	2.36962e-06	0.000229098
Cd9	2030.62	0.39234	4.71616	2.40339e-06	0.000229122
Zfp568	612.977	0.394438	4.71613	2.40369e-06	0.000229122
Kif21b	842.56	0.584383	4.71569	2.40894e-06	0.000229122
Aebp2	799.389	0.345503	4.71423	2.42632e-06	0.000229535
Tob2	1046.11	0.440209	4.71123	2.46231e-06	0.000231402
Crkl	1192.79	0.365487	4.6957	2.65699e-06	0.000247367
Rgag4	5834.44	0.349583	4.69133	2.71434e-06	0.000251376
4931440P22Rik	58.6796	0.615407	4.68164	2.84589e-06	0.00026218
Pcsk1	7948.4	0.363854	4.67554	2.93183e-06	0.000267298
Cerk	954.527	0.466999	4.67251	2.97538e-06	0.00026987
Trpc7	123.666	0.610623	4.66755	3.04818e-06	0.000275055
Lmtk2	1758	0.335695	4.65428	3.25119e-06	0.000291877
Etv4	83.9224	0.596965	4.65092	3.30463e-06	0.000295169
Srf	1243.54	0.398809	4.64563	3.39035e-06	0.000301296
Il1rapl2	111.376	0.593597	4.64397	3.41777e-06	0.000302206
Ccdc117	868.365	0.382491	4.64068	3.47265e-06	0.000305524
Chga	68779.7	0.537864	4.63748	3.52674e-06	0.000308227
Rcc2	3055.63	0.459901	4.6368	3.53841e-06	0.000308227
Nespas	313.157	0.580306	4.62929	3.66924e-06	0.00031649
Entpd6	963.516	0.339384	4.62487	3.74826e-06	0.000321729
Oxnad1	1159.58	0.372612	4.61886	3.85847e-06	0.000329581
Prkch	1316.53	-0.393811	-4.61675	3.898e-06	0.000331349
Eif4ebp1	379.242	0.522538	4.61572	3.91732e-06	0.00033139
Nedd9	270.051	0.498063	4.59883	4.24866e-06	0.000355997
Slc23a2	3390.89	0.409529	4.58207	4.60398e-06	0.000383941
AK039878	221.833	0.455207	4.57805	4.69328e-06	0.000389542
Neil1	697.908	0.474908	4.57427	4.77886e-06	0.000394783
Hey1	967.911	0.396252	4.5729	4.81024e-06	0.000394919
Slc38a1	4883.71	0.337429	4.57224	4.82539e-06	0.000394919
Gm16062	134.9	0.562118	4.56763	4.93262e-06	0.000401826
Dusp4	60.1455	0.596056	4.56449	5.00722e-06	0.000406023
Perp	1120.36	-0.354346	-4.55748	5.17711e-06	0.000417202
Rgs8	872.026	-0.406077	-4.55686	5.1925e-06	0.000417202
Mfge8	5184.65	0.433135	4.54789	5.41856e-06	0.000433386
Gdnf	144.653	0.367784	4.53956	5.63713e-06	0.000448828
Fam107b	419.899	0.59548	4.53666	5.71523e-06	0.000452997
Slc16a3	136.407	0.577022	4.52592	6.01343e-06	0.000474494
Srxn1	6088.43	0.581096	4.51611	6.29861e-06	0.000494778
Klf4	157.13	0.575213	4.50557	6.61965e-06	0.000517686
6030419C18Rik	1467.05	-0.336726	-4.49169	7.0661e-06	0.000550155
Tnfrsf25	116.944	0.576832	4.48459	7.30559e-06	0.000563812
Fndc4	920.014	0.543489	4.47981	7.47097e-06	0.000574058
D030028A08Rik	385.177	0.567705	4.47574	7.61479e-06	0.000582565
TRNA_Ser	16.7797	0.467494	4.47346	7.69629e-06	0.000586251
Slc9a9	607.993	0.485402	4.4565	8.33089e-06	0.000631855
Nphp4	523.948	0.45557	4.44715	8.7019e-06	0.000657161
Xpa	283.255	-0.462081	-4.44366	8.84417e-06	0.000665051
Rorc	2660.53	0.38776	4.43459	9.22469e-06	0.000690713
Atp5d	4427.46	0.388656	4.42694	9.55805e-06	0.000712642
Zfp612	3443.37	0.385475	4.42577	9.60968e-06	0.000713468
Rbms2	979.282	0.361903	4.41027	1.03241e-05	0.000763292
Mthfr	3044.19	0.462945	4.38381	1.16624e-05	0.000858626
Mafg	746.114	0.351102	4.37633	1.20693e-05	0.000884878
Cbr2	492.581	0.514544	4.36853	1.25084e-05	0.000913268
Oxsm	523.563	-0.370925	-4.3635	1.28001e-05	0.000930701
Tmem132b	1755.46	-0.382297	-4.35873	1.30817e-05	0.000943386
AI118078	844.328	-0.364683	-4.34598	1.38655e-05	0.000995827
Derl3	371.056	0.47749	4.34135	1.4161e-05	0.0010072
Ctse	519.725	0.3342	4.33997	1.42502e-05	0.0010072
Dpf1	498.997	-0.393083	-4.33993	1.42528e-05	0.0010072
AK040485	530.092	0.413357	4.32499	1.52536e-05	0.00106509
Sox18	94.6563	-0.580047	-4.32316	1.53812e-05	0.00106976
Grasp	142.992	0.559567	4.3147	1.59822e-05	0.00110718
Sox4	1163.4	-0.464777	-4.31237	1.61511e-05	0.0011113
Pim2	1036.17	0.345074	4.31131	1.6229e-05	0.0011113
Acta2	204.9	0.552809	4.31018	1.63125e-05	0.0011113
Ddit4	1770.05	0.346301	4.30906	1.63949e-05	0.0011113
A430033K04Rik	749.631	-0.334683	-4.3082	1.64592e-05	0.0011113
Ccdc66	784.462	-0.349241	-4.30786	1.64839e-05	0.0011113
Pyroxd2	372.598	0.397698	4.30698	1.655e-05	0.00111151
Gpam	1178.68	-0.337048	-4.30444	1.67407e-05	0.00112004
Snora34	52.2668	0.554537	4.29959	1.71113e-05	0.00114049
Ptprn	21456.3	0.378138	4.2946	1.75009e-05	0.00116206
Nupr1	304.224	0.453417	4.29103	1.77849e-05	0.00117648
Cebpg	1445.95	0.336429	4.27696	1.89462e-05	0.00124395
Atp5e	3563.96	0.370651	4.27446	1.91602e-05	0.00125332
Axin2	834.615	-0.353802	-4.27331	1.92591e-05	0.00125513
Whrn	2976.35	-0.374633	-4.27226	1.93504e-05	0.00125526
Mir132	25.1101	0.373277	4.27164	1.94038e-05	0.00125526
Jrk	374.162	-0.386067	-4.26735	1.97813e-05	0.00127033
Homer1	445.636	0.555155	4.25568	2.08416e-05	0.00132873
Pars2	257.921	-0.436779	-4.25098	2.12841e-05	0.00135137
Gadd45a	841.709	0.407189	4.24948	2.14271e-05	0.00135137
Acsl4	1007.35	0.340608	4.24787	2.15813e-05	0.00135623
Trp53inp2	3659.78	0.430081	4.23908	2.24441e-05	0.00140134
Mycn	281.026	-0.531391	-4.23893	2.24584e-05	0.00140134
Nrsn1	2868.6	-0.470811	-4.23217	2.31443e-05	0.00143904
Prrt3	818.243	-0.34643	-4.22984	2.33858e-05	0.00144384
Prrx1	681.54	0.504194	4.2269	2.36931e-05	0.00145771
AB341725	1136.47	0.339444	4.21863	2.45786e-05	0.00150692
AI504432	579.32	-0.446589	-4.21642	2.48208e-05	0.00151648
Zfp36	638.569	0.499357	4.20452	2.61631e-05	0.00158897
Ttc30b	780.084	-0.344015	-4.20289	2.63528e-05	0.00159348
Slc6a9	222.719	0.544963	4.19918	2.67879e-05	0.00161239
Zfp65	428.052	-0.364423	-4.19867	2.68487e-05	0.00161239
Trim66	3991.78	0.376029	4.19769	2.69652e-05	0.00161387
Cp	987.386	0.340612	4.18047	2.90912e-05	0.00172451
Ehhadh	418.661	-0.361325	-4.17047	3.03967e-05	0.00179483
Wnt9a	492.67	-0.471255	-4.16908	3.05828e-05	0.00179978
Gdf15	58.8563	0.450554	4.15396	3.2677e-05	0.00190392
Peg10	2148.64	0.421242	4.15051	3.31736e-05	0.00192648
Bub1b	188.418	0.531876	4.14899	3.33945e-05	0.00193293
Cdh13	1044.35	0.480431	4.14598	3.38371e-05	0.00195212
Pvr	911.056	0.518573	4.14498	3.39846e-05	0.00195303
Per1	4989.86	0.461138	4.14418	3.41025e-05	0.00195303
Pcdh1	338.833	0.406828	4.14307	3.42684e-05	0.00195303
Tspyl3	638.237	-0.349184	-4.13478	3.55294e-05	0.00201225
Mum1l1	1386.28	-0.416192	-4.13455	3.55655e-05	0.00201225
Manea	836.735	-0.354332	-4.13077	3.61551e-05	0.00203905
Zfp937	484.362	-0.385009	-4.12805	3.65853e-05	0.0020518
Mt3	943.682	0.42156	4.12785	3.66172e-05	0.0020518
Slc37a2	318.992	0.479425	4.12714	3.6731e-05	0.0020518
Krt18	2998.24	0.332545	4.12128	3.7678e-05	0.00209142
Kctd18	512.051	-0.343084	-4.11393	3.88987e-05	0.00213877
Acd	1597.08	0.432909	4.11372	3.89328e-05	0.00213877
Ddah1	967.401	-0.468498	-4.11343	3.89828e-05	0.00213877
Trp53inp1	3693.71	-0.389861	-4.11322	3.90171e-05	0.00213877
Tet1	814.627	-0.381973	-4.11129	3.93453e-05	0.00215006
Cyp51	1398.7	0.48921	4.11021	3.95304e-05	0.00215349
Mmd2	1040.01	-0.387621	-4.10574	4.03017e-05	0.00218323
Hps4	931.17	0.400174	4.10491	4.04465e-05	0.00218323
Fam220a	1045.99	0.382713	4.10419	4.05726e-05	0.00218323
AK048598	118.28	-0.49024	-4.09438	4.23302e-05	0.00227086
Epdr1	994.31	0.390635	4.08877	4.33668e-05	0.0023194
Eps8l2	1056.34	0.368044	4.07961	4.5112e-05	0.00240543
Nlrx1	250.871	-0.420801	-4.06984	4.70449e-05	0.00249338
Cpa4	169.65	0.532255	4.06829	4.7359e-05	0.00250249
Gm6225	186.733	0.481669	4.06547	4.79367e-05	0.00252353
Nell1	1323.36	0.528278	4.06494	4.80439e-05	0.00252353
Pycr1	1577.05	0.421855	4.05288	5.05902e-05	0.0026415
Dusp1	2463.95	0.35502	4.05214	5.07518e-05	0.0026421
Trim16	313.123	-0.473757	-4.03818	5.38672e-05	0.00279601
Apod	4418.13	0.33105	4.03374	5.48964e-05	0.00284105
Noxred1	46.2664	0.524928	4.03185	5.53388e-05	0.00285555
Pstk	323.854	-0.387286	-4.02317	5.74199e-05	0.00295427
Kcnn2	471.135	-0.393807	-4.02151	5.78264e-05	0.00296651
Sepn1	1645.88	0.427213	4.01916	5.8406e-05	0.00298753
Usp29	1048.84	0.401299	4.01702	5.89397e-05	0.00300609
Gls2	448.188	0.516665	3.99861	6.37169e-05	0.00322173
Phlda1	348.241	0.457098	3.99544	6.45754e-05	0.00325579
Zrsr1	1806.05	0.32544	3.98976	6.61402e-05	0.00332515
AK008482	64.0364	0.521049	3.98871	6.64338e-05	0.0033304
Tpm4	3665.43	0.443967	3.98678	6.69754e-05	0.00334801
Rfc3	575.404	0.387691	3.9859	6.72241e-05	0.00335092
Pde12	415.719	0.383646	3.97601	7.00801e-05	0.00347361
S100a6	325.321	0.502066	3.97356	7.08063e-05	0.00349974
AK030561	578.136	-0.420985	-3.96584	7.31369e-05	0.00359474
Nfkbia	1528.01	0.387434	3.96213	7.42849e-05	0.003641
Phf13	575.226	0.450717	3.95725	7.58178e-05	0.00369554
Txnl4b	375.705	-0.341486	-3.94774	7.88908e-05	0.00381363
Dusp8	861.579	0.511336	3.94639	7.93377e-05	0.00382473
Mb21d2	1699.54	-0.395001	-3.944	8.01327e-05	0.0038525
Crb1	563.035	0.388201	3.94141	8.10055e-05	0.00386483
Zfp92	1021.63	0.43751	3.93962	8.16112e-05	0.00388116
Cwc25	1378.04	0.515456	3.93488	8.32368e-05	0.00393719
Ttc30a1	601.437	-0.338534	-3.93074	8.46837e-05	0.00397359
Clcf1	144.004	0.494621	3.92611	8.63294e-05	0.00403235
Ago2	1560.36	0.428184	3.92593	8.63944e-05	0.00403235
Mthfd1l	319.192	0.469197	3.92505	8.67132e-05	0.00403652
Irf7	287.847	0.449336	3.92174	8.7913e-05	0.00408157
Epha1	577.825	-0.482838	-3.90867	9.28063e-05	0.00428614
Adgrl4	754.593	-0.368906	-3.90712	9.34036e-05	0.00429804
AK013890	43.4732	0.487636	3.90673	9.35526e-05	0.00429804
C77370	2478.45	-0.440706	-3.89367	9.87384e-05	0.00450104
Fam222a	1059.57	0.448794	3.89153	9.96152e-05	0.0045176
Zfp763	438.062	-0.336634	-3.88423	0.000102656	0.00464355
Engase	280.112	-0.416275	-3.8817	0.000103729	0.00468004
Cys1	65.8194	0.497633	3.87162	0.000108113	0.00485293
Zfp120	564.353	-0.363684	-3.86926	0.000109168	0.00488785
Lmna	2597.03	0.33714	3.86688	0.000110234	0.00492306
Phgdh	625.192	0.388274	3.86339	0.000111824	0.00498141
Cgnl1	3894.62	-0.370642	-3.85753	0.000114538	0.00508944
Slc5a3	824.219	0.363158	3.852	0.000117156	0.0051796
AK145129	642.156	0.478507	3.84926	0.000118477	0.0052118
Tspan4	386.001	0.395336	3.8422	0.000121936	0.00535059
Narf	1015.77	-0.362389	-3.83612	0.000124992	0.00545463
Zdbf2	3275.72	0.503218	3.83482	0.000125655	0.00545932
Chst12	870.785	-0.342522	-3.83163	0.000127297	0.00550347
Serpina3n	153.931	0.384127	3.81533	0.000136003	0.00582534
Lox	595.602	0.496129	3.81521	0.000136066	0.00582534
Zfp141_	432.994	-0.331901	-3.80744	0.000140414	0.00599692
Arl5c	48.5706	0.496027	3.80437	0.000142167	0.00604245
AK170928	103.434	0.49622	3.79992	0.000144743	0.00612393
Bbc3	398.728	-0.447461	-3.79986	0.00014478	0.00612393
Tmem100	133.241	0.453125	3.79915	0.000145193	0.00612664
Hspa12a	622.987	0.364239	3.79587	0.000147129	0.0061907
Dnase1l2	162.476	0.431758	3.79539	0.000147414	0.0061907
Uck2	794.107	0.449681	3.7931	0.000148777	0.00623303
Irs2	1179.95	0.495943	3.78765	0.000152077	0.00635616
Rcor2	266.687	-0.392053	-3.78376	0.000154475	0.00642764
Gm7008	47.0158	0.491507	3.78369	0.000154518	0.00642764
Zbtb11	1053.87	0.328965	3.78231	0.00015538	0.00644829
Fgf1	1402.39	0.341193	3.77952	0.00015713	0.00650557
Pak6	538.615	0.481995	3.77815	0.000157999	0.0065109
Ankrd37	295.753	-0.451673	-3.7753	0.000159818	0.00655514
Hs6st2	316.563	0.475586	3.77396	0.000160678	0.0065751
Hfe	739.453	0.385343	3.77037	0.000163005	0.00664186
Peo1	689.654	-0.35928	-3.77026	0.000163077	0.00664186
Angptl6	420.488	0.406543	3.76966	0.000163468	0.00664186
Ccdc115	825.259	-0.32451	-3.76913	0.000163819	0.00664186
Srrd	414.2	0.47469	3.76805	0.000164529	0.00665531
AB353040	97.9875	0.491212	3.76666	0.000165449	0.00666187
Ugt8a	357.856	-0.436534	-3.76143	0.000168946	0.00675629
Asphd2	1152.7	0.491931	3.75952	0.000170238	0.00679255
Pik3ip1	1133.18	-0.404844	-3.74841	0.000177962	0.00708464
TRNA_Thr	22.5394	0.417996	3.74489	0.000180476	0.0071685
5330429B09Rik_	931.518	0.39734	3.74149	0.000182936	0.00723357
Lrrc26	60.0507	0.481422	3.73659	0.000186529	0.00732627
Csrnp1	733.279	0.368506	3.73347	0.000188859	0.00740127
Plcxd2	560.747	-0.430759	-3.72625	0.000194353	0.00759965
Ubxn10	949.343	-0.374097	-3.72402	0.000196073	0.00764987
Fbxo5	112.906	-0.433883	-3.72298	0.000196882	0.00766447
Gla	583.089	0.338082	3.71457	0.000203551	0.00788918
Vim	1492.37	0.357278	3.70634	0.000210278	0.00806113
Plekhg4	324.801	-0.369746	-3.70233	0.000213632	0.0081719
Efcab7	215.781	-0.392441	-3.70083	0.000214892	0.00820225
Fgfbp3	249.688	0.475776	3.69231	0.000222227	0.00839019
Hbegf	114.795	0.463989	3.69225	0.000222275	0.00839019
Serpine1	150.515	0.45026	3.6921	0.000222406	0.00839019
Scml4	459.124	0.333738	3.68424	0.000229389	0.00857773
Ccdc184	478.455	0.451124	3.68346	0.000230091	0.00857773
Ier2	816.161	0.46937	3.68143	0.000231927	0.00862787
Pde4a	1302.54	0.339245	3.68061	0.000232678	0.00863756
Fam110b	562.321	-0.365633	-3.66062	0.000251604	0.00926196
Gpr61	229.199	-0.417795	-3.65967	0.000252543	0.00927712
Zfp143	407.983	-0.372443	-3.64032	0.000272299	0.00989954
Zbtb16	688.245	-0.417183	-3.63405	0.000279012	0.0101018
Gm13889	219.244	0.473277	3.63074	0.000282604	0.0101954
Chrna6	1155.07	-0.416911	-3.62258	0.00029168	0.010453
Agtr1a	1708.55	-0.339103	-3.62101	0.000293455	0.0104952
Elmsan1	861.65	0.361619	3.6193	0.000295397	0.0105432
Ifitm3	2088.5	0.343215	3.61862	0.000296176	0.0105484
Tceanc	278.195	-0.366446	-3.6069	0.00030988	0.0109271
Tubb6	1236.62	0.393302	3.59794	0.000320749	0.0112428
Coq10b	1984.74	0.420163	3.59178	0.000328424	0.0114662
Ccrn4l	1235.37	0.469743	3.59047	0.000330078	0.0115011
Apold1	302.271	-0.393352	-3.58788	0.000333374	0.011593
Ccng2	935.129	-0.374473	-3.57516	0.000350008	0.012076
Fhl4	85.0858	-0.450861	-3.57332	0.00035248	0.0121375
Pop4	609.749	0.338986	3.572	0.000354263	0.0121625
Zfp773	94.5438	-0.446205	-3.57125	0.000355281	0.0121625
Klk1b16	299.778	0.46761	3.5705	0.000356301	0.0121685
Tacstd2	125.637	0.456797	3.56846	0.000359081	0.0122213
Cd24a	3415.11	0.426886	3.56595	0.000362546	0.0122916
Tmem98	381.178	0.400551	3.55905	0.000372205	0.0125454
Zfp518a	579.959	-0.339085	-3.55857	0.000372883	0.0125454
Plekhh3	1067.46	0.354438	3.55726	0.000374738	0.0125838
Tubb3	1576.14	-0.341914	-3.55167	0.000382798	0.0127812
Dscaml1	456.401	-0.405129	-3.54837	0.000387629	0.0129042
Bysl	687.221	0.34178	3.54687	0.000389834	0.0129425
Asic2	141.101	0.444218	3.54325	0.000395222	0.0130967
Mknk2	3011.32	0.351555	3.53447	0.000408597	0.0134136
Galnt13	742.321	0.449163	3.53317	0.000410613	0.0134546
Tmem229a	269.31	-0.366587	-3.53148	0.000413244	0.0134862
Dusp16	857.926	0.335708	3.53107	0.000413874	0.0134862
Ankrd9	117.996	0.44388	3.52435	0.000424526	0.0137568
Ctss	1008.33	-0.327495	-3.52159	0.000428974	0.0138754
Spry1	646.667	0.416732	3.51863	0.000433787	0.0139797
Pde8b	658.853	-0.370917	-3.51698	0.000436483	0.0140272
Tmem86b	193.558	0.388776	3.51676	0.000436855	0.0140272
Lrrc73	772.324	0.433832	3.51339	0.000442429	0.0141545
AK045688	49.8165	-0.437631	-3.5111	0.000446258	0.0142511
Kpna1	1164.59	0.392804	3.50129	0.00046302	0.0146534
C920006O11Rik	358.445	-0.340473	-3.49886	0.00046726	0.0147346
AK007939	102.217	-0.420171	-3.49755	0.000469546	0.0147802
Cst6	287.49	0.458152	3.49549	0.0004732	0.0148255
Sertad1	389.284	0.438762	3.49531	0.000473511	0.0148255
Pglyrp1	19.7376	0.368221	3.48962	0.0004837	0.0150119
Aff4	6873.56	0.342117	3.48677	0.000488899	0.0151456
Epor	88.2143	-0.438312	-3.4807	0.000500111	0.0154115
Retsat	326.305	0.348206	3.47976	0.000501862	0.0154384
Mmrn1	157.409	-0.44347	-3.47735	0.000506388	0.0155505
Gsta3	214.065	0.368921	3.46855	0.000523275	0.0159576
AK030777	56.4816	-0.427863	-3.46513	0.000529982	0.0161342
Xist	22.9832	0.328363	3.45033	0.000559909	0.0169572
Il33	445.614	0.366215	3.44957	0.000561481	0.0169756
Frat1	272.452	-0.404084	-3.43893	0.000584017	0.0175404
Nr1d1	734.241	-0.363041	-3.42672	0.000610921	0.0183131
AK079811	79.2961	0.446152	3.42265	0.000620129	0.0185141
Rrad	165.964	0.359642	3.42142	0.00062296	0.0185475
Fam178b	40.5211	0.422279	3.42076	0.000624467	0.018561
Ror2	502.008	-0.378199	-3.41957	0.00062721	0.0185798
Zfp273	168.888	-0.414577	-3.419	0.000628515	0.0185871
C3ar1	109.495	-0.434238	-3.41837	0.000629968	0.0185989
Skil	2903.74	0.399587	3.41697	0.000633229	0.0186638
Ky	494.612	-0.351734	-3.41588	0.000635767	0.0186806
Elovl4	243.799	0.421853	3.41338	0.000641613	0.0188164
AK018092	236.818	-0.40328	-3.41109	0.00064703	0.0189437
Zfp960	367.472	-0.35515	-3.40982	0.000650059	0.0189692
Wdr72	318.88	0.436036	3.40784	0.000654784	0.0190755
Mgp	2982.82	0.335739	3.40488	0.000661936	0.0192202
Igfbp6	290.54	0.391524	3.40128	0.000670706	0.0193789
Sesn1	3435.94	-0.371573	-3.3966	0.000682276	0.0196206
Ttn	1325.43	0.397954	3.38948	0.000700247	0.0200122
AK045483	50.4811	-0.421437	-3.38935	0.000700585	0.0200122
Mtss1l	876.402	0.403863	3.38572	0.00070993	0.0202029
Fbxo33	1168.66	0.334909	3.37785	0.000730538	0.0206997
Cartpt	57.2764	0.438795	3.37707	0.000732618	0.0207204
Zfp40	514.123	-0.324014	-3.37636	0.00073451	0.0207204
Ccdc6	1478.12	0.331484	3.37175	0.000746914	0.0209612
Banp	853.958	-0.329797	-3.37099	0.000748977	0.0209857
Btg2	7027.69	0.43751	3.36977	0.000752321	0.0210458
Prox1	757.533	0.399207	3.36873	0.000755149	0.0210914
Gm10409	396.324	-0.348148	-3.36237	0.00077276	0.0214471
Fmo2	188.59	0.401367	3.35834	0.000784119	0.0216599
Etv5	927.373	0.408583	3.35782	0.000785606	0.021667
Cd7	65.0412	0.434966	3.35668	0.000788849	0.0217223
Relb	163.51	0.374999	3.35073	0.000805994	0.0221252
Xkr6	138.918	0.429934	3.34249	0.000830308	0.0226163
Ccdc162	321.948	0.434032	3.34105	0.000834633	0.0226639
Dok3	208.338	0.363262	3.33916	0.000840319	0.0227481
Unc5b	196.969	0.432001	3.33628	0.000849075	0.0228795
Tmem159	913.187	-0.34297	-3.3354	0.000851774	0.0229172
AK047145	173.961	-0.37684	-3.33325	0.000858374	0.0230537
Pim1	374.38	-0.339712	-3.33169	0.000863188	0.0231182
Neu2	35.679	0.396725	3.32681	0.000878454	0.0234557
Usp51	325.51	0.359794	3.31399	0.000919759	0.0242307
Rspo4	335.804	0.433882	3.31385	0.000920202	0.0242307
Pdgfa	157.36	0.351343	3.31216	0.000925797	0.0243139
AK139445	75.3025	-0.422754	-3.31034	0.000931822	0.0244088
Slc7a5	642.122	0.381031	3.30973	0.000933847	0.024416
Mical2	1140.16	0.374691	3.30454	0.00095132	0.0247992
1700102P08Rik	43.9863	0.424055	3.29777	0.000974552	0.0253223
AF357426	16.9029	0.380398	3.29437	0.000986435	0.0255631
Gpx8	237.427	0.330144	3.2874	0.00101117	0.0260888
Tcerg1l	536.606	-0.326618	-3.28338	0.00102572	0.0264253
Zfp867	444.256	-0.354946	-3.28213	0.00103026	0.0265036
Lpl	1017.69	0.342934	3.28149	0.00103262	0.0265255
Pecam1	626.381	-0.33885	-3.27414	0.00105985	0.0271063
Prr15	354.548	-0.383472	-3.2727	0.00106524	0.0272045
Tgfbi	718.394	0.418177	3.26989	0.0010759	0.027371
Csf1	386.151	0.350148	3.26975	0.00107642	0.027371
Nap1l3	770.749	0.368641	3.26907	0.001079	0.0273969
Fstl3	186.216	-0.396111	-3.26532	0.0010934	0.0276034
Mamstr	196.967	-0.404986	-3.26115	0.00110959	0.027972
Pim3	1701.56	0.426975	3.25897	0.00111819	0.0280342
Psph	466.04	0.350782	3.24513	0.00117396	0.0291353
Cryba2	532.581	0.413335	3.24464	0.001176	0.029145
AU041133	231.995	-0.344116	-3.24419	0.00117786	0.0291499
Tmem154	108.971	0.409777	3.23492	0.00121676	0.0299025
Cilp	1136.77	-0.355477	-3.22939	0.00124053	0.0302751
2210404O09Rik	148.337	-0.369126	-3.22255	0.00127053	0.0307938
Pmepa1	930.931	0.359944	3.22113	0.00127686	0.0308269
Neurod4	1331.29	-0.370261	-3.21818	0.00129008	0.0310536
Nfe2l3	53.0761	0.417921	3.2145	0.00130672	0.0313257
Uts2	29.6883	0.380822	3.21079	0.00132373	0.0316717
Arhgap19	988.586	-0.325738	-3.21056	0.00132476	0.0316717
Gm1045	20.2054	0.361007	3.20998	0.00132745	0.0316931
Lypd2	24.1248	0.398889	3.20909	0.00133154	0.0317048
Slc2a6	149.156	0.364393	3.20454	0.0013528	0.0320806
Reep6	216.889	0.410054	3.2012	0.00136857	0.0323675
4930417O13Rik	111.254	0.41581	3.19967	0.00137586	0.0324961
Fgfr2	405.637	0.334513	3.19756	0.00138596	0.0326908
Fastkd5	301.367	0.328732	3.19677	0.00138975	0.0327133
Mrc2	664.724	0.380074	3.19437	0.00140137	0.0329219
Zfp85	160.147	-0.378373	-3.19322	0.00140695	0.0329941
Zfp759	247.65	-0.329713	-3.19119	0.00141686	0.033109
9430083A17Rik	158.734	-0.368704	-3.18837	0.00143076	0.0333895
Sec16b	1543.08	-0.359728	-3.18536	0.00144573	0.0336496
Jade1	1734.49	0.357366	3.18341	0.00145549	0.033832
Rpp40	252.498	-0.343386	-3.1801	0.00147223	0.0340412
2810047C21Rik1	136.225	-0.431467	-3.17753	0.00148535	0.0342097
Col24a1	916.241	-0.32637	-3.1743	0.00150197	0.0344634
Aloxe3	668.981	0.379383	3.16956	0.00152671	0.0349792
Csdc2	955.296	0.359269	3.16414	0.00155544	0.035463
Arhgap23	998.997	0.329092	3.15674	0.00159542	0.0361301
Pbld1	89.843	0.41078	3.15634	0.00159763	0.0361336
E130311K13Rik	163.535	-0.366368	-3.15002	0.00163259	0.0366416
Rgs16	1408.03	-0.322901	-3.14957	0.00163511	0.0366432
Ccdc109b	1503.43	0.379524	3.14926	0.00163682	0.0366432
Mitf	311.791	-0.332823	-3.14823	0.00164262	0.0367263
Nov	450.059	-0.39022	-3.14546	0.00165824	0.0370285
Enho	708.394	0.36343	3.13991	0.00168998	0.0376229
Ctps	804.331	0.337182	3.13734	0.0017049	0.0378219
AK163478	193.059	-0.386854	-3.1363	0.00171097	0.0378219
Nelfcd	6407.52	0.402383	3.12679	0.00176728	0.0388229
Cdr2	2099.4	0.332239	3.12579	0.0017733	0.0389064
Lrrc7	217.198	0.33223	3.124	0.00178412	0.0390898
Zscan2	245.339	-0.326588	-3.12364	0.00178627	0.0390898
Fam198a	70.2143	0.405589	3.12205	0.00179599	0.0390898
Itm2a	656.097	-0.326467	-3.12187	0.00179704	0.0390898
Krt17	86.8184	0.387203	3.11953	0.00181141	0.0392532
Nkrf	246.871	0.386062	3.11825	0.00181926	0.0393289
AK142725	134.235	-0.376264	-3.1167	0.00182888	0.0394374
Exosc6	204.978	0.333205	3.11631	0.00183132	0.0394417
B230206H07Rik	120.501	0.404359	3.1129	0.00185262	0.0398454
Fgf21	37.058	0.323181	3.11258	0.00185459	0.0398454
Mmp23	129.13	0.38859	3.1116	0.00186074	0.0398802
DQ541657	56.9158	0.399414	3.11112	0.00186377	0.0398965
D030047H15Rik	164.691	0.398476	3.10926	0.00187554	0.040051
Grid1	139.892	-0.389651	-3.10822	0.00188219	0.0401442
Kcnq4	122.941	0.367793	3.10269	0.00191772	0.0406068
Rcan1	682.325	0.322865	3.10004	0.00193496	0.0407754
Kcnk5	96.4308	0.401664	3.07454	0.00210824	0.0439534
4930515G01Rik	48.3547	-0.388571	-3.07399	0.00211216	0.0439829
Mex3d	410.013	0.335739	3.06969	0.0021428	0.0445156
Mboat2	385.642	-0.326994	-3.05262	0.00226855	0.0465237
Map3k9	460.82	0.324595	3.04968	0.00229088	0.0469269
Gm15663	125.666	0.377247	3.04872	0.00229819	0.0469731
Colq	58.8973	0.398431	3.04835	0.00230101	0.0469731
Clic3	135.005	0.355345	3.04423	0.0023328	0.0472088
Dlgap3	1048.62	-0.326878	-3.04116	0.00235667	0.0474462
Palmd	852.167	0.368709	3.03617	0.00239601	0.0481281
Ephx1	2454.49	0.324864	3.03411	0.00241246	0.0484033
Cyp2t4	480.47	0.392535	3.03256	0.00242487	0.0484864
Gm3704	206.458	0.389444	3.02922	0.00245186	0.0487491
Prss23	781.953	-0.337571	-3.02624	0.00247612	0.04901
Ak5	100.084	-0.380821	-3.02135	0.00251649	0.0495859
Etl4	548.051	0.337465	3.02083	0.00252084	0.049616
Pcdha12	241.562	0.356788	3.0195	0.00253196	0.0497792

## Sheet: Fem_NoRest_PSD_vs_NoRest_NoPSD
Gene	baseMean	log2FoldChange	stat	pvalue	padj
Lcn2	826.048	1.00849	7.52691	5.19568e-14	8.96099e-10
Cga	82535	-0.678008	-7.04187	1.89671e-12	1.63563e-08
Nmb	335.628	1.02307	6.66258	2.69067e-11	1.54687e-07
Clu	22726.4	0.707615	6.3209	2.6005e-10	1.12127e-06
Cdh13	1031.14	0.886651	5.87157	4.31676e-09	1.46869e-05
Rab26	235.864	0.641206	5.84357	5.10939e-09	1.46869e-05
Plk5	455.813	0.647696	5.66349	1.48324e-08	3.65449e-05
Scn11a	205.324	-0.829468	-5.5743	2.48526e-08	5.3579e-05
Cabp1	343.473	0.637922	5.45482	4.9023e-08	8.66058e-05
Cpe	26650.4	0.454629	5.44185	5.27288e-08	8.66058e-05
Tbkbp1	373.556	0.505416	5.43357	5.52365e-08	8.66058e-05
Rasa4	3353.59	-0.342151	-5.35563	8.52597e-08	0.000113113
Rasl10b	1737.9	0.562421	5.30984	1.09719e-07	0.000126155
Chga	47529.8	0.727083	5.18706	2.13634e-07	0.000216738
Vgf	756.755	0.752539	5.10436	3.31919e-07	0.000308023
Sorcs1	240.708	0.654997	5.10018	3.3933e-07	0.000308023
Serpina3n	123.999	0.529835	5.06033	4.18527e-07	0.000360917
Serpinb11	217.073	0.710967	5.03736	4.7199e-07	0.000387639
Arg1	223.429	0.77047	4.99591	5.8558e-07	0.000459068
Mgp	3002.31	0.444132	4.9454	7.59879e-07	0.000540122
Jam2	4091.23	0.612691	4.93958	7.82921e-07	0.000540122
Thsd7b	672.559	0.444537	4.88688	1.02448e-06	0.000654412
AK154635	150.072	0.706089	4.84321	1.27756e-06	0.000772901
Metrn	487.257	0.699984	4.83982	1.2996e-06	0.000772901
Mt3	1115	0.577055	4.82929	1.37021e-06	0.000787734
Foxl2os	1242.9	-0.560932	-4.81342	1.48372e-06	0.000825476
Vstm4	203.184	0.659771	4.73697	2.16941e-06	0.00113381
Apod	3944.86	0.678918	4.69608	2.65206e-06	0.00128895
Gm4477	54.6469	0.704653	4.69314	2.69045e-06	0.00128895
C2cd4c	180.783	-0.704782	-4.65199	3.28751e-06	0.00146035
Gm9949_	56.2239	0.671192	4.65107	3.30223e-06	0.00146035
Sptbn4	1516.02	0.385486	4.62409	3.76241e-06	0.00162226
Cck	190.431	0.682622	4.60573	4.11022e-06	0.001729
Hist1h1c	718.398	0.583347	4.58573	4.52405e-06	0.00185322
Tspan4	365.744	0.477525	4.57651	4.72787e-06	0.00185322
Slc2a6	112.746	0.629863	4.52204	6.12477e-06	0.00234742
Mthfd1l	222.665	0.480488	4.50052	6.77881e-06	0.00254161
Adam23	621.812	0.45339	4.49071	7.09871e-06	0.00255065
A2m	484.603	0.591619	4.46798	7.89607e-06	0.00272367
Cacna1f	138.412	-0.64918	-4.44167	8.9264e-06	0.0030187
Grm2	64.6214	0.582691	4.42844	9.4919e-06	0.00305529
AK030561	733.904	-0.671136	-4.42792	9.51476e-06	0.00305529
Galnt13	673.954	0.610035	4.42017	9.8624e-06	0.00309267
Rbm20	2828.11	-0.56492	-4.38264	1.1725e-05	0.00337251
Klk1b26	431.999	0.636724	4.3789	1.19281e-05	0.00337251
Klk1b16	222.547	0.673651	4.3675	1.25674e-05	0.00349597
Crisp1	206.336	0.662756	4.32031	1.5581e-05	0.00418035
Rxfp1	1047.6	-0.596434	-4.31601	1.58874e-05	0.00418035
Etv4	73.0035	0.651548	4.31449	1.59972e-05	0.00418035
Gstt1	939.084	0.351302	4.30073	1.70234e-05	0.00433701
Cdkn1c	464.222	0.54045	4.28922	1.79305e-05	0.00448185
Nfkbia	1928.37	-0.559477	-4.27446	1.91597e-05	0.00472067
Arfgap1	4829.51	-0.335549	-4.26607	1.98948e-05	0.00476562
Gm13889	172.128	0.641329	4.25983	2.04581e-05	0.00476813
Ryr3	302.979	0.638407	4.24299	2.20564e-05	0.00500536
AW011738	47.9969	0.619428	4.22195	2.42197e-05	0.0054249
Nrip3	740.617	0.631121	4.21011	2.55248e-05	0.00564393
BC096411	3917.89	-0.392389	-4.20424	2.61958e-05	0.00571897
Chil1	91.4017	0.646348	4.19848	2.68715e-05	0.00573552
Fads2	2371.49	0.343286	4.19793	2.69367e-05	0.00573552
Atp2b2	1548.62	0.399994	4.18149	2.89599e-05	0.00609112
Cav2	479.769	0.530438	4.14751	3.36105e-05	0.0069841
Dmrta1	298.372	-0.653511	-4.14266	3.43294e-05	0.00704855
Gch1	204.517	0.611359	4.13783	3.50611e-05	0.0071141
Scn1b	653.774	0.440517	4.11526	3.86751e-05	0.00766701
P2ry1	105.592	0.558922	4.11034	3.95081e-05	0.00769079
Hs6st2	333.766	0.605603	4.10929	3.96869e-05	0.00769079
C77370	2661.04	-0.580938	-4.09985	4.13409e-05	0.00770351
Phf19	216.024	0.426076	4.09136	4.28858e-05	0.00786863
Ssr2	5521.44	-0.550273	-4.07251	4.65087e-05	0.00844354
Mettl1	1024.28	-0.344612	-4.05334	5.04911e-05	0.00897465
Trf	570.361	0.567194	4.04452	5.24299e-05	0.00897465
Dclk1	7328.74	-0.519562	-4.03761	5.39975e-05	0.00897465
Nxph4	35.0574	0.621268	4.03741	5.40445e-05	0.00897465
AK046721	121.493	-0.605215	-4.0368	5.41848e-05	0.00897465
Nxph1	90.9668	0.597667	4.03485	5.46378e-05	0.00897465
Fut1	77.5522	0.62692	4.02335	5.73773e-05	0.00933573
Ecel1	8189.88	-0.608072	-3.99938	6.35076e-05	0.0100568
Atf5	1332.79	0.444248	3.99703	6.41413e-05	0.0100568
Cspg5	376.194	0.615241	3.98106	6.86094e-05	0.0105652
Col17a1	187.557	0.585203	3.97194	7.12883e-05	0.0106271
Slc6a9	186.117	0.607741	3.96755	7.26163e-05	0.0106271
Mme	776.733	0.521855	3.96672	7.28691e-05	0.0106271
Col1a2	7599.81	-0.519277	-3.96643	7.29571e-05	0.0106271
Specc1	567.914	0.48508	3.96624	7.30159e-05	0.0106271
A930003O13Rik	81.3343	-0.605592	-3.96406	7.36869e-05	0.0106271
Dlgap3	835.714	0.35373	3.96324	7.39408e-05	0.0106271
Cacna1i	851.871	0.487134	3.95749	7.57429e-05	0.0107962
Matn2	231.794	0.481788	3.94595	7.9485e-05	0.0111411
Rpf2	280.292	-0.39869	-3.94228	8.07105e-05	0.0111411
Abca1	1811.32	0.467195	3.94217	8.07463e-05	0.0111411
Itm2b	37836.9	-0.456314	-3.92581	8.6438e-05	0.0118317
Arpc1b	562.906	0.394719	3.91828	8.91829e-05	0.0120571
Ajap1	155.099	0.545331	3.91747	8.94829e-05	0.0120571
Slc35d3	112.764	0.596732	3.91339	9.10112e-05	0.012168
Pde7b	1110.47	-0.57177	-3.90949	9.24912e-05	0.0122707
Dlg2	1677.86	0.391499	3.89608	9.77608e-05	0.0125718
Gucy1b3	653.52	0.494034	3.89587	9.7848e-05	0.0125718
Rab3b	2844.68	0.416022	3.89463	9.83479e-05	0.0125718
Ndor1	1413.11	-0.344534	-3.89339	9.88532e-05	0.0125718
Paqr4	314.764	0.380251	3.89257	9.91884e-05	0.0125718
Col24a1	430.685	-0.521005	-3.89092	9.9863e-05	0.0125718
Myo5c	908.416	-0.478695	-3.88886	0.000100718	0.0125858
Klhl36	289.951	0.444546	3.88714	0.000101434	0.0125858
Pcdhgc5	265.239	0.405465	3.88511	0.000102284	0.0126006
Arhgef10l	577.039	0.372744	3.88189	0.00010365	0.0126459
Il34	112.114	0.586924	3.88079	0.000104118	0.0126459
Cntn4	104.226	0.544646	3.87473	0.000106743	0.0127847
Scg2	65531.8	0.482672	3.87205	0.000107922	0.0128368
Kcnip2	317.095	0.578458	3.86831	0.000109592	0.012918
Hlf	1627.66	0.324274	3.86489	0.000111137	0.012918
Ephx1	2295.89	0.418723	3.86227	0.000112337	0.012918
Igfbp4	1582.28	0.447594	3.86184	0.000112534	0.012918
Pak7	185.495	-0.596892	-3.85928	0.000113719	0.012918
Gpr137c	93.4786	0.488046	3.85648	0.00011503	0.0129668
Ldlrad2	62.6502	-0.565086	-3.85171	0.000117295	0.0131363
Cst6	200.426	0.587066	3.84495	0.000120578	0.0134168
Lhb	13472.6	-0.416145	-3.84117	0.000122449	0.0135376
Ankra2	1726.95	-0.514305	-3.83422	0.000125965	0.0138377
Gmppb	1990.61	-0.465177	-3.81525	0.000136047	0.0147572
Slc24a3	733.056	0.496023	3.81292	0.000137333	0.0147811
Mfap3l	424.401	0.583786	3.80941	0.000139299	0.0147811
Dach2	262.369	-0.453397	-3.80929	0.000139367	0.0147811
Arpp21	258.968	0.5842	3.80345	0.000142694	0.0150064
Trpc7	125.711	0.588551	3.80167	0.000143722	0.0150228
Ntsr2	76.3732	0.518028	3.79994	0.000144733	0.0150374
Gm13446	141.127	-0.574884	-3.78765	0.000152082	0.0157063
Prl	4.67648e+06	-0.505514	-3.78229	0.00015539	0.0159002
Alg8	411.388	-0.393121	-3.7802	0.000156704	0.0159002
Mapk4	149.724	0.612174	3.77702	0.000158715	0.0159776
Ngfr	177.291	0.519883	3.77316	0.000161194	0.0160405
Ano4	282.353	-0.552149	-3.76937	0.000163661	0.0161295
Samd4	157.784	0.531567	3.75777	0.000171435	0.0167997
Ostc	4584.22	-0.479323	-3.74646	0.000179349	0.0173471
Pemt	210.192	-0.570475	-3.74372	0.000181319	0.0173471
Neu2	60.0201	0.562243	3.7427	0.000182051	0.0173471
Col9a3	190.421	0.499434	3.73759	0.000185796	0.0176067
Gadd45b	899.173	0.512763	3.72635	0.000194273	0.0181613
Serpinb1a	41.8828	0.581043	3.72566	0.000194808	0.0181613
Sox10	47.0331	0.391187	3.72323	0.000196691	0.0182384
Trem2	97.285	0.499629	3.71811	0.000200719	0.0183788
H1fx	180.782	0.487718	3.71784	0.000200936	0.0183788
Ppm1j	246.541	0.493644	3.69583	0.000219169	0.0194845
Enho	590.242	0.477358	3.69167	0.000222789	0.0197048
Lonrf3	168.644	0.436021	3.68516	0.000228562	0.0201123
Tgif1	305.4	-0.434542	-3.68372	0.000229859	0.0201237
Slc37a2	217.388	0.536615	3.67898	0.000234172	0.0202541
Myc	625.172	-0.587141	-3.67476	0.000238077	0.0202541
Spty2d1	2237.35	-0.444683	-3.67277	0.000239936	0.0202541
Acsbg1	169.65	0.323348	3.66938	0.000243141	0.0202582
Mab21l1	85.6749	0.570159	3.66758	0.000244859	0.0203033
Stk32a	1592.43	-0.33619	-3.66463	0.000247692	0.0204399
Gsn	3017.19	0.377822	3.653	0.000259191	0.0211736
Hist1h4i	240.469	0.459856	3.64516	0.000267222	0.0216374
Otx2	103.103	0.573422	3.64331	0.00026915	0.0216917
Gabra4	431.084	0.460146	3.63755	0.00027524	0.0217858
Gdap1l1	2188.47	-0.45388	-3.63136	0.000281929	0.022002
Lpar1	283.203	0.538939	3.62963	0.000283833	0.0220507
Scfd1	2726.12	-0.328168	-3.62551	0.000288389	0.022171
Gpr25	38.7706	0.560917	3.62475	0.000289238	0.022171
Dph5	184.304	-0.435548	-3.62346	0.000290685	0.0221834
Cd59a	1047.89	0.401022	3.62207	0.000292253	0.0222048
Gareml	84.0587	0.569748	3.61835	0.000296486	0.0224276
Ap1s2	1427.31	0.399819	3.61324	0.000302399	0.022775
Ptn	2251.93	0.542104	3.60625	0.000310653	0.0229964
Scel	202.784	0.535933	3.60267	0.000314967	0.0229964
Nkain1	540.991	0.377261	3.60254	0.000315118	0.0229964
Ly6g6e	27.7565	0.421563	3.60088	0.000317143	0.0229964
Golga7b	371.222	0.479703	3.60071	0.000317355	0.0229964
Spr	474.711	0.363086	3.59963	0.000318672	0.0229964
Lama4	322.339	0.414434	3.59253	0.000327488	0.0233396
Vstm2a	287.589	0.381298	3.58481	0.000337319	0.0237459
AK161964	442.811	0.550246	3.5825	0.000340318	0.0237704
Slc39a5	45.2263	0.543605	3.58106	0.000342201	0.0237704
Trpc3	192.905	0.522114	3.58031	0.000343181	0.0237704
Slc13a3	177.85	0.534752	3.5761	0.000348752	0.0239638
Cpne7	628.607	0.537692	3.57384	0.000351779	0.0240759
AK036329	50.3591	0.54952	3.57145	0.000355017	0.0241766
Snord88a	121.418	-0.447764	-3.56881	0.000358601	0.0241766
Efhd2	800.57	0.323238	3.56633	0.00036202	0.0242948
AK137436	334.435	-0.457767	-3.56482	0.000364105	0.024314
Abca8a	1104.53	0.471106	3.56409	0.000365126	0.024314
Tnfrsf19	117.322	0.566936	3.55716	0.000374883	0.0246483
Cgref1	508.587	-0.550146	-3.55574	0.000376919	0.0246483
Th	154.426	0.334357	3.55548	0.000377292	0.0246483
Cdh11	593.475	-0.517773	-3.55409	0.000379292	0.0246855
Atp1b2	1963.72	0.467782	3.54822	0.000387844	0.0250835
Ccdc108	125.256	0.522569	3.53809	0.000403029	0.0257446
Hdac9	494.117	0.464616	3.53482	0.000408053	0.0259693
Fam185a	772.839	-0.402833	-3.53054	0.000414714	0.0262171
Tmem163	305.04	0.521311	3.52872	0.000417575	0.0262374
Prkce	3225.68	-0.46563	-3.52208	0.000428181	0.0262374
Chml	750.955	-0.525719	-3.52005	0.000431465	0.0262374
Cp	767.825	0.351409	3.51969	0.000432051	0.0262374
Thrb	3788.75	-0.515853	-3.5171	0.000436292	0.0262374
Ptges	870.965	-0.391906	-3.5157	0.000438603	0.0262374
Kirrel3	394.678	0.507672	3.51117	0.000446138	0.0262374
Col19a1	155.07	0.541064	3.51075	0.000446846	0.0262374
Reln	4822.46	-0.468321	-3.50995	0.000448199	0.0262374
Sh3d19	1222.2	-0.503553	-3.50985	0.00044836	0.0262374
Pdia5	986.463	-0.333614	-3.50941	0.000449105	0.0262374
Slc2a3	548.151	0.406324	3.50793	0.000451612	0.0262374
Susd1	596.903	0.407495	3.50744	0.000452434	0.0262374
Tmem151a	340.754	0.412067	3.50691	0.00045334	0.0262374
Emilin1	703.225	-0.429985	-3.5021	0.000461599	0.0265373
Pmm1	865.167	0.322224	3.4901	0.000482833	0.027465
Pdgfa	151.692	0.466686	3.48489	0.000492347	0.0275698
Dnm1	1437.72	0.488029	3.48195	0.00049778	0.0276777
Zic1	139.213	0.500504	3.48073	0.000500058	0.0276777
Igfbp2	460.049	0.505835	3.48039	0.000500693	0.0276777
Tmem200a	277.354	0.54177	3.4773	0.000506491	0.0278199
Pus1	417.516	-0.361078	-3.4692	0.000522019	0.0281954
Sulf1	2087.31	0.36001	3.46862	0.000523136	0.0281954
C1qtnf4	550.939	0.403383	3.46197	0.000536242	0.0287751
Cbs	112.095	0.485052	3.46097	0.000538232	0.0287751
Olig1	76.3283	0.508637	3.45961	0.00054095	0.0287956
Fcrls	162.564	0.414301	3.45869	0.000542813	0.0288058
Rorc	2136.4	0.3352	3.45278	0.00055485	0.0290965
Stat5a	3061.54	-0.456611	-3.45187	0.000556726	0.0290965
Fxyd1	366.194	0.542	3.45088	0.000558756	0.0291144
Pomc	2.26228e+06	0.528462	3.44714	0.000566545	0.0294313
Tmem229a	193.747	0.488842	3.43839	0.000585186	0.0300654
Islr	1538.86	0.446326	3.43731	0.000587512	0.0300654
Sepp1	3794.24	0.353028	3.4357	0.000591027	0.0300654
Adgrb1	1470.03	0.506749	3.43241	0.000598245	0.0301971
Col23a1	666.179	0.493882	3.43216	0.000598795	0.0301971
Polr3d	1404.49	-0.41172	-3.42952	0.000604655	0.0304038
Rcn1	3242.87	-0.47214	-3.42246	0.000620567	0.0311131
Apoe	11252.7	0.528162	3.41649	0.000634337	0.0315286
Car2	305.771	0.538839	3.413	0.000642514	0.0318432
Fam132b	175.649	-0.529859	-3.40956	0.000650689	0.0321226
Nptx2	315.839	0.50888	3.4082	0.000653923	0.0321316
Prex2	466.643	0.366298	3.40629	0.00065853	0.0322144
Dusp4	65.3309	0.513726	3.40546	0.000660518	0.0322144
Klhl23	488.77	0.404771	3.40441	0.000663079	0.0322144
Csdc2	969.823	0.506754	3.38816	0.00070364	0.0338915
Ncan	207.77	0.353726	3.38176	0.000720235	0.034204
Kcnd2	605.717	0.35784	3.38069	0.000723044	0.034204
Atp1a2	3908.61	0.530495	3.38038	0.000723862	0.034204
Megf11	4116.21	0.518489	3.37855	0.000728684	0.0342546
Cnp	628.494	0.410209	3.37847	0.000728906	0.0342546
Ralyl	140.803	0.519196	3.37018	0.000751192	0.035073
Trnp1	449.072	0.44634	3.36973	0.000752422	0.035073
Dgkg	220.545	0.470757	3.3689	0.000754696	0.0350842
Rab3il1	169.351	0.345906	3.35799	0.000785115	0.0361719
2410002F23Rik	997.066	-0.331963	-3.35751	0.000786483	0.0361719
Tsr1	1384.41	-0.387448	-3.35531	0.000792764	0.0363382
Impg1	608.741	-0.327901	-3.35404	0.000796419	0.0363382
Myzap	50.2134	0.514544	3.34548	0.000821391	0.0371578
St8sia4	66.1704	0.488616	3.34494	0.000823001	0.0371578
Trpv2	113.371	0.456127	3.34336	0.000827714	0.0372255
Serinc2	1171.3	0.376284	3.34076	0.000835499	0.0374282
Rasd1	1851.27	-0.499006	-3.33999	0.000837811	0.0374345
Gale	1359.4	-0.446114	-3.33884	0.000841293	0.0374747
Gfap	383.275	0.419142	3.33468	0.000853977	0.0377021
Dgkb	362.885	0.461502	3.33312	0.000858772	0.0377021
Chil6	142.778	-0.50669	-3.33302	0.000859102	0.0377021
Hn1l	2119.53	-0.416879	-3.32751	0.000876269	0.038068
Dbndd2	400.36	0.404373	3.32543	0.000882824	0.0381031
Plod2	1999.57	-0.408683	-3.32483	0.000884722	0.0381031
A330050F15Rik	94.8961	0.40923	3.32365	0.000888464	0.0381031
Hist1h4k	168.747	0.404827	3.32307	0.000890331	0.0381031
Fzd7	580.712	0.332718	3.31729	0.000908949	0.0388036
Pdgfd	320.925	0.420399	3.3115	0.000927983	0.039221
2900052L18Rik_	251.363	0.368444	3.31062	0.000930886	0.039221
Pcsk2	35988.7	0.509686	3.30968	0.000934031	0.039221
Gdf1	325.818	0.377927	3.30859	0.000937668	0.039221
Pdzrn3	125.146	0.422993	3.30838	0.00093839	0.039221
Ttc9	290.878	0.365845	3.30814	0.000939193	0.039221
Tekt5	101.438	0.491143	3.30385	0.000953655	0.039497
Plk2	882.638	0.342214	3.3033	0.000955538	0.039497
Nrep	2265.98	-0.443377	-3.3028	0.000957254	0.039497
Ngef	238.805	0.476028	3.29731	0.000976167	0.0398751
Nrarp	133.076	0.520998	3.29612	0.000980295	0.0398751
B3gnt9	1597.18	-0.4658	-3.2961	0.000980355	0.0398751
Hist3h2ba	266.543	0.429769	3.29546	0.0009826	0.0398751
Rnf32	398.854	0.360876	3.28874	0.00100637	0.0404712
Nkain4	39.9946	0.500109	3.28757	0.00101055	0.0404712
Utp20	833.055	-0.335532	-3.28587	0.0010167	0.0405902
Rpl12	1067.28	-0.388542	-3.28221	0.00102995	0.04093
Sfrp1	98.2649	0.520506	3.27888	0.00104219	0.041321
Kcnc2	115.522	0.504853	3.2763	0.00105177	0.0415045
Ier3ip1	2419.79	-0.479259	-3.27499	0.00105665	0.0415045
Chgb	123840	-0.36621	-3.27488	0.00105707	0.0415045
Copb2	9872.66	-0.370722	-3.27338	0.0010627	0.0415045
Nr5a1	992.401	-0.403441	-3.27112	0.00107122	0.041705
1190002N15Rik	579.79	0.363064	3.27036	0.00107412	0.0417237
AK219219	1845.55	-0.402079	-3.26568	0.00109203	0.0420408
Amigo2	1089.73	0.397826	3.25895	0.00111824	0.0427635
Diras1	703.374	0.32735	3.25202	0.00114586	0.0434344
Smco2	198.392	-0.501027	-3.24879	0.00115898	0.0437394
Slc9a9	498.649	0.396174	3.24349	0.00118074	0.0440763
Wls	2334.56	0.333953	3.24323	0.00118181	0.0440763
AK217854	2135.73	-0.390471	-3.24156	0.00118877	0.0440763
Hmox1	196.706	0.34772	3.24115	0.00119049	0.0440763
Kcnh1	607.758	0.44511	3.24102	0.00119102	0.0440763
Gldc	522.265	0.488556	3.24042	0.00119354	0.0440763
Gdpd1	384.571	0.337676	3.2404	0.00119363	0.0440763
Chst2	261.417	0.463914	3.24023	0.00119433	0.0440763
Ildr2	879.773	0.451191	3.23888	0.00119999	0.0440763
Pla1a	41.7768	0.483396	3.23877	0.00120047	0.0440763
Agbl2	124.67	0.404144	3.23737	0.00120635	0.0440907
Rpl10a	2493.43	-0.322379	-3.23731	0.00120663	0.0440907
Grik1	490.075	0.477172	3.23647	0.00121018	0.044127
Ptprr	306.896	0.409449	3.23584	0.00121287	0.0441316
Etv1	2251.02	0.457088	3.23509	0.00121606	0.0441544
Gfod1	591.663	-0.343657	-3.23082	0.00123434	0.0446304
Etohd2	261.512	0.354196	3.22948	0.00124016	0.0447192
Pcsk6	8442.65	-0.484533	-3.22902	0.00124216	0.0447192
Ppp1r1a	254.13	0.464518	3.22846	0.00124458	0.0447192
Sstr4	42.8085	0.495403	3.22335	0.00126702	0.0451482
Abat	1263.41	0.322496	3.22325	0.00126744	0.0451482
Sec61b	2896.64	-0.365765	-3.22304	0.00126838	0.0451482
Tppp	415.147	0.470614	3.22227	0.00127178	0.0451482
Cep72	117.313	0.45587	3.22193	0.00127332	0.0451482
Myo18a	2074.8	0.33878	3.22158	0.00127484	0.0451482
Slc1a1	147.72	0.501869	3.21675	0.00129654	0.0455564
Ern1	2692.57	-0.44198	-3.21666	0.00129693	0.0455564
Rrp1b	725.351	-0.364817	-3.21278	0.00131455	0.0460445
Fam81a	119.264	0.509242	3.21243	0.00131617	0.0460445
Psat1	673.705	0.471637	3.20727	0.00133999	0.046772
Stra6	168.894	0.49338	3.20607	0.0013456	0.046772
Aifm3	342.421	0.487004	3.2056	0.00134781	0.046772
C130026L21Rik	83.9682	-0.3442	-3.20414	0.00135467	0.0468143
Gstt3	307.352	0.329648	3.20331	0.00135858	0.0468143
Ppp1r1b	174.399	0.441491	3.20275	0.00136124	0.0468143
Nrxn2	1356.7	0.43624	3.20047	0.00137202	0.0470442
Chadl	93.0858	0.476448	3.19926	0.00137783	0.0471425
Lrp4	214.501	0.500128	3.19841	0.00138188	0.0471425
Cys1	66.3493	0.429994	3.19476	0.00139946	0.0475129
D19Bwg1357e	1090.82	-0.393315	-3.19345	0.00140583	0.0476354
Fam212b	1117.21	0.413565	3.19052	0.00142018	0.047933
Epha5	258.912	0.419557	3.18985	0.00142348	0.0479506
Cobll1	314.281	0.394684	3.18918	0.00142678	0.0479683
Hspa13	2076.19	-0.340185	-3.18719	0.00143664	0.0480452
Bzw2	756.948	-0.340643	-3.1859	0.00144303	0.0480461
Chst11	2858.04	-0.489564	-3.18132	0.00146606	0.0483464
Agt	102.2	0.459982	3.17858	0.00148	0.0484995
D16Ertd472e	1013.07	-0.431331	-3.17602	0.0014931	0.0485149
Aplnr	237.889	-0.486662	-3.17481	0.00149933	0.0485158
Rhbdf1	287.187	0.344602	3.17376	0.00150478	0.0485408
Fgf14	738.122	0.377895	3.17358	0.00150573	0.0485408
Raly	4453.57	-0.44978	-3.16564	0.00154741	0.0494834
Il20ra	61.6113	0.491056	3.16528	0.00154932	0.0494834
Car14	176.927	0.495596	3.16242	0.00156466	0.0498794
AK205379	20664.4	-0.382387	-3.16167	0.00156868	0.0498794
Trpm3	1281.8	0.497173	3.16135	0.00157039	0.0498794
Ptgds	5479.5	0.381802	3.15854	0.00158564	0.0499192
Mbnl1	2899.4	-0.335415	-3.15792	0.00158901	0.0499192
Apcdd1	81.8186	0.491096	3.15664	0.00159601	0.0499571

## Sheet: Fem_Rest_NoPSD_vs_NoRest_NoPSD
Gene	baseMean	log2FoldChange	stat	pvalue	padj
Il1b	76.3536	1.68742	10.8318	2.43303e-27	3.73786e-23
Slc25a25	2447.99	0.970145	9.57926	9.77445e-22	7.50825e-18
AK006051	275.985	1.36462	9.52195	1.69961e-21	8.70372e-18
Nr4a3	734.903	1.00151	9.49125	2.28276e-21	8.76751e-18
Nr4a1	12733.7	1.21986	9.42586	4.26608e-21	1.31079e-17
Per1	4434.42	1.22833	9.3683	7.37119e-21	1.88739e-17
Egr3	215.809	1.36313	9.30617	1.32525e-20	2.90855e-17
Mknk2	3203.14	0.490351	9.14732	5.83619e-20	1.12077e-16
Nr4a2	5565.36	1.14324	8.82851	1.06082e-18	1.81081e-15
Dusp14	2527.46	1.13981	8.70093	3.29178e-18	5.05716e-15
Coq10b	1656.9	1.07136	8.21306	2.15615e-16	3.01136e-13
Fosb	1158.57	0.731397	7.62584	2.42453e-14	3.10401e-11
Gadd45b	899.173	1.07031	7.57224	3.66851e-14	4.33534e-11
Pard6a	769.074	0.680022	7.33951	2.14374e-13	2.35245e-10
Gem	804.784	0.989107	7.30569	2.75842e-13	2.77229e-10
Sik1	1513.82	1.06622	7.29955	2.88724e-13	2.77229e-10
Fam212b	1117.21	0.940903	7.20988	5.60025e-13	5.06098e-10
Egr4	65.2191	1.09308	7.19062	6.44956e-13	5.5047e-10
Clk1	4855.47	0.365281	7.10208	1.22895e-12	9.93703e-10
B3galt2	438.794	0.99478	7.09283	1.31396e-12	1.00932e-09
Pvr	770.863	1.00813	6.95265	3.5849e-12	2.62261e-09
Ptp4a1	3038.8	0.856745	6.51204	7.41369e-11	5.17712e-08
AK039878	385.675	0.703047	6.47992	9.17703e-11	6.12986e-08
Mthfr	2303.54	0.426556	6.3676	1.92012e-10	1.22912e-07
Gm29766	287.228	0.558203	6.30425	2.89592e-10	1.7796e-07
Csrnp1	650.353	0.835648	6.25795	3.90063e-10	2.30482e-07
Mest	20506.8	0.791869	6.10344	1.03809e-09	5.69576e-07
Mcl1	3132.12	0.380264	5.98756	2.13008e-09	1.12843e-06
BC057675	533.058	0.871733	5.97552	2.29363e-09	1.15005e-06
AK216824	706.275	0.861728	5.97361	2.32062e-09	1.15005e-06
Crem	2226.4	0.792597	5.83331	5.43394e-09	2.6088e-06
Zdbf2	3048.06	0.791469	5.78066	7.44097e-09	3.46307e-06
Grasp	138.628	0.718204	5.77568	7.66416e-09	3.46307e-06
Gla	497.309	0.443979	5.72014	1.06437e-08	4.67197e-06
Gpr3	51.9809	0.827496	5.70411	1.16956e-08	4.99109e-06
Maff	76.1335	0.875237	5.6908	1.26442e-08	5.25007e-06
Midn	3756.98	0.773575	5.64769	1.62616e-08	6.57438e-06
Erf	1329.42	0.488287	5.63806	1.71979e-08	6.77465e-06
AK205396	265.247	0.82593	5.59401	2.21878e-08	8.52179e-06
Rgs2	3099.85	0.75023	5.51883	3.41259e-08	1.27872e-05
Plk3	191.166	0.754566	5.50528	3.68588e-08	1.34824e-05
Tmem198	1172.92	0.594861	5.46325	4.67495e-08	1.67026e-05
Parp16	282.087	-0.459443	-5.44811	5.09077e-08	1.77749e-05
Pmvk	943.775	0.4713	5.44065	5.30874e-08	1.8124e-05
AK013890	48.303	0.828572	5.41684	6.06601e-08	2.02591e-05
Fosl2	6864.32	0.761695	5.3627	8.19888e-08	2.67999e-05
B230216N24Rik	177.542	0.803139	5.35816	8.4073e-08	2.69086e-05
Cited2	1568	-0.788297	-5.34593	8.99554e-08	2.82038e-05
Traf4	414.883	0.438408	5.33829	9.38296e-08	2.85036e-05
Fem1c	794.837	0.375458	5.33676	9.46225e-08	2.85036e-05
Dos	11525.9	0.672305	5.32979	9.83286e-08	2.90504e-05
Dnajb1	1760.77	0.673329	5.24898	1.52941e-07	4.43327e-05
Gls2	325.991	0.622268	5.21799	1.80876e-07	5.14592e-05
Inpp5f	2458.49	0.516304	5.19942	1.99914e-07	5.58415e-05
Skil	2170.88	0.436628	5.17204	2.31547e-07	6.35224e-05
Mat2a	4341.04	0.498773	5.16343	2.42467e-07	6.53513e-05
AK202078	6643.65	0.424607	5.15974	2.47292e-07	6.55025e-05
Gprc5a	123.171	0.703047	5.11715	3.10193e-07	8.0771e-05
Siah2	417.046	0.522967	4.99731	5.81343e-07	0.000148853
Tfap4	187.336	-0.593381	-4.95355	7.2873e-07	0.000183532
Dusp5	118.217	0.69907	4.93905	7.85022e-07	0.000191204
Mir335	55.4843	0.740881	4.93692	7.93665e-07	0.000191204
Zfp184	186.008	0.682474	4.93622	7.96528e-07	0.000191204
Zfp960	325.491	-0.494611	-4.91233	8.99986e-07	0.000212715
Klf14	581.506	0.620655	4.89358	9.90205e-07	0.000230493
AK017280	1018.38	0.44012	4.80972	1.51143e-06	0.00034657
Josd1	1330.59	0.376047	4.80082	1.58015e-06	0.000356999
Emd	2749.96	0.58311	4.76918	1.84977e-06	0.000411854
Serpine1	315.53	0.671946	4.74851	2.04925e-06	0.000449752
Zfp870	204.685	-0.456999	-4.72517	2.29923e-06	0.000497509
Atf3	287.147	0.475106	4.71031	2.47337e-06	0.000520527
Nedd9	271.384	0.502574	4.61666	3.89959e-06	0.000798793
Trp53inp2	3726.16	0.398876	4.60585	4.10787e-06	0.000830385
Amer3	269.651	-0.439779	-4.60039	4.21704e-06	0.000834755
Stk32a	1592.43	-0.417854	-4.59317	4.36559e-06	0.000839616
Cwc25	1219.66	0.684082	4.57036	4.86893e-06	0.000903851
Fam13c	886.661	0.665584	4.56975	4.88314e-06	0.000903851
Tiparp	746.65	0.671601	4.53294	5.81693e-06	0.00104634
Syt4	9484.96	0.509863	4.53148	5.85729e-06	0.00104634
Nap1l5	7190.93	0.475367	4.5234	6.08536e-06	0.00106663
Nupl2	288.968	-0.390779	-4.52256	6.10972e-06	0.00106663
Rgs16	973.244	-0.403093	-4.50323	6.69298e-06	0.00113176
Jun	738.778	-0.666728	-4.50288	6.70377e-06	0.00113176
C230071H18Rik	180.009	0.57844	4.48736	7.21107e-06	0.00119122
Spry4	190.186	0.579857	4.43778	9.0892e-06	0.00146987
Cry2	2090.87	0.402569	4.4079	1.04378e-05	0.00165315
Taf13	254.923	0.470249	4.38958	1.13572e-05	0.00176244
Jade1	1476.23	0.457696	4.38527	1.15841e-05	0.00177966
Dclre1b	263.516	-0.328218	-4.35406	1.33639e-05	0.00201284
Trmt61b	335.102	0.628211	4.34445	1.39625e-05	0.00208259
Atp5d	4087.7	0.333729	4.33723	1.4429e-05	0.00211117
Tuba4a	2737.57	0.372838	4.33292	1.47143e-05	0.0021326
Ifrd1	1800.69	0.545112	4.30484	1.67108e-05	0.00227825
AK138383	82.5191	-0.522078	-4.24772	2.15953e-05	0.00291025
Oxnad1	930.336	0.346186	4.23778	2.25737e-05	0.00301565
Rbms2	1059.62	0.338572	4.19558	2.72176e-05	0.00357389
Fbxo33	1038.21	0.364927	4.18665	2.83103e-05	0.00368585
Cpa4	186.004	0.609829	4.182	2.88961e-05	0.00373021
Zc3h12c	777.218	0.47895	4.17223	3.0163e-05	0.00376575
Neurl3	83.9888	0.531896	4.17162	3.02448e-05	0.00376575
Hlf	1627.66	0.345959	4.16778	3.07578e-05	0.00378026
Cyp51	1030.51	0.370486	4.16315	3.13881e-05	0.0038271
Ccdc166	260.556	-0.41618	-4.12615	3.68879e-05	0.00442742
Ccdc184	387.378	0.375508	4.11563	3.86116e-05	0.00453593
AK021342	63.3108	0.626341	4.11524	3.86777e-05	0.00453593
Cpeb4	2630.15	0.421745	4.11334	3.89971e-05	0.00453874
Papd4	291.584	-0.348781	-4.09203	4.27622e-05	0.00486634
Kif18a	324.723	0.611136	4.07561	4.58944e-05	0.00517775
Fam46a	8025.2	0.502618	4.07251	4.65098e-05	0.00517775
Pop4	476.135	0.36678	4.05697	4.97138e-05	0.00545538
Sertad1	352.775	0.4537	4.04252	5.28807e-05	0.00576175
Zfp128	188.999	-0.42414	-4.03506	5.45894e-05	0.00590604
Zfp937	416.759	-0.360677	-4.02287	5.74923e-05	0.0061766
Srrd	362.461	0.529754	4.00092	6.30971e-05	0.00659429
Vps37b	934.164	0.585379	3.9805	6.87696e-05	0.00698287
Spata2l	369.39	0.44069	3.9784	6.93801e-05	0.00698287
A830010M20Rik	1738.69	0.410596	3.96801	7.24742e-05	0.00716965
Dedd2	692.194	0.347256	3.96694	7.28026e-05	0.00716965
Sox4	1363.1	-0.458481	-3.95671	7.59888e-05	0.00743577
Mycn	345.315	-0.598422	-3.95379	7.69214e-05	0.00747939
Zfp39	471.545	-0.437691	-3.9506	7.79546e-05	0.00753218
Bag3	1370.62	0.563858	3.94708	7.91098e-05	0.00758493
Pim3	1527.08	0.445609	3.94594	7.9488e-05	0.00758493
D030047H15Rik	94.3379	0.582008	3.94033	8.13702e-05	0.00771661
Gm12750	1337.28	-0.334174	-3.92851	8.54747e-05	0.008007
Fndc4	898.977	0.488684	3.92266	8.7578e-05	0.00815431
Zc2hc1c	360.171	-0.407566	-3.90727	9.3343e-05	0.008587
Srf	1274.75	0.345113	3.8941	9.85647e-05	0.00886323
Zc3hav1l	457.896	-0.326517	-3.88735	0.000101343	0.00900581
Zfp97	335.243	-0.393078	-3.88719	0.000101413	0.00900581
Egr2	94.6903	0.57471	3.88265	0.000103326	0.00912293
Nap1l3	760.303	0.36465	3.87491	0.000106662	0.00927326
Asphd2	1260.66	0.534852	3.87314	0.000107443	0.00927326
Zfp143	346.932	-0.335462	-3.85942	0.000113658	0.00975488
Trib1	674.583	0.469497	3.85434	0.000116041	0.00990407
Zbtb21	857.745	0.382411	3.83456	0.00012579	0.0106768
Arhgap23	997.104	0.361464	3.81472	0.000136337	0.011261
Zfp46	663.489	-0.333896	-3.80274	0.000143106	0.0115713
Nab2	1288.96	0.462971	3.79706	0.000146421	0.0117773
Fam131a	2484.65	0.354731	3.7816	0.000155821	0.0124035
Avpi1	331.736	0.409068	3.7749	0.000160073	0.0126763
Usp27x	326.965	0.367622	3.72599	0.00019455	0.0149444
Zfp280b	623.754	-0.332475	-3.71039	0.000206937	0.0158168
Nfil3	577.865	0.532384	3.69926	0.000216233	0.0163645
Hus1	123.011	-0.446227	-3.69507	0.00021983	0.0164744
BC049150	214.756	-0.329502	-3.69069	0.000223646	0.0165984
Cebpa	85.8886	0.570553	3.67784	0.000235219	0.0173734
Arrdc3	1891.75	-0.328074	-3.66538	0.000246972	0.0181542
AK045867	82.215	0.540523	3.66011	0.000252104	0.0184432
Nfkbiz	379.442	0.453239	3.65287	0.000259329	0.0188819
Hmgcr	1826.16	0.335376	3.64003	0.000272605	0.0196621
Ccdc117	883.986	0.342049	3.60124	0.000316709	0.0224221
Errfi1	1121.93	0.538981	3.58689	0.000334646	0.023369
Zfp551	169.524	-0.367759	-3.5796	0.000344115	0.0238982
Prr36	526.389	-0.341778	-3.55712	0.000374942	0.0254878
5730405O15Rik	154.797	-0.348446	-3.55135	0.000383263	0.0259386
Homer1	524.813	0.519081	3.54935	0.000386188	0.026022
Bcl2l11	731.303	0.393563	3.54468	0.000393096	0.0263717
Filip1l	102.223	0.481682	3.52806	0.000418623	0.0277211
Arl5c	59.8165	0.495939	3.52504	0.000423421	0.0279185
Frat1	243.166	-0.464418	-3.52013	0.000431336	0.0282558
Etaa1	328.855	-0.34364	-3.51741	0.000435777	0.028368
Cidea	858.446	0.505624	3.50439	0.00045766	0.0294714
Tm6sf2	53.434	0.507455	3.5028	0.000460401	0.0294714
Ptchd2	605.215	0.445423	3.50051	0.000464374	0.0296024
Tmed5	661.994	0.329129	3.48971	0.000483552	0.0304459
Lars2	14486.2	0.485105	3.47877	0.000503717	0.0315861
Zfp763	370.849	-0.325434	-3.46806	0.000524239	0.0327393
Dhrs4	396.847	0.376136	3.45508	0.000550124	0.0338062
Lonrf1	693.444	0.40492	3.45177	0.000556932	0.0340882
AK083547	559.559	0.344628	3.43628	0.000589766	0.0358125
Zfp455	100.199	-0.442611	-3.43091	0.000601563	0.0363851
AK051222	48.0049	0.492738	3.42767	0.00060878	0.0365339
Rcor2	244.826	-0.410135	-3.42564	0.000613358	0.0366654
Fancf	141.236	-0.41704	-3.4114	0.000646295	0.0380422
Map10	338.06	-0.359435	-3.3941	0.000688545	0.0399174
Ehhadh	294.286	-0.388496	-3.38401	0.000714343	0.0410559
H2-D1	5324.87	0.331695	3.38021	0.000724309	0.0413253
Nrip1	645.686	-0.442681	-3.37946	0.000726279	0.0413253
Zfp759	225.261	-0.332772	-3.36915	0.000754008	0.042087
Mfhas1	1050.82	0.365735	3.36907	0.00075422	0.042087
D030028A08Rik	336.856	0.474775	3.36141	0.000775453	0.0427437
4930417O13Rik	48.4675	0.507584	3.32672	0.000878738	0.0478725
Nrros	216.584	0.454585	3.32559	0.000882325	0.0478981
Spata7	903.885	0.324698	3.31556	0.000914602	0.0489583

## Sheet: Fem_Rest_PSD_vs_NoRest_NoPSD
Gene	baseMean	log2FoldChange	stat	pvalue	padj
Per1	4434.42	1.47668	11.1949	4.32061e-29	6.63776e-25
Nr4a3	734.903	1.29639	10.881	1.41998e-27	1.09075e-23
Nr4a1	12733.7	1.42059	10.4234	1.93988e-25	9.93413e-22
AK006051	275.985	1.51804	10.332	5.04891e-25	1.93916e-21
Slc25a25	2447.99	1.04622	10.3048	6.70046e-25	2.05878e-21
Dusp14	2527.46	1.34709	10.2288	1.47299e-24	3.77159e-21
Nr4a2	5565.36	1.37675	9.99464	1.60871e-23	3.53066e-20
Clk1	4855.47	0.490095	9.466	2.90768e-21	5.58384e-18
Lcn2	826.048	1.24971	9.27265	1.81577e-20	3.09952e-17
Il1b	76.3536	1.38107	9.11269	8.03652e-20	1.23465e-16
B3galt2	438.794	1.27061	8.94015	3.8864e-19	5.01924e-16
Egr3	215.809	1.29356	8.93918	3.92052e-19	5.01924e-16
Fam212b	1117.21	1.1625	8.84665	9.01892e-19	1.06583e-15
Mknk2	3203.14	0.477395	8.81189	1.23051e-18	1.35031e-15
Gem	804.784	1.26406	8.74144	2.30165e-18	2.35735e-15
Coq10b	1656.9	1.13316	8.66864	4.37302e-18	4.19892e-15
Sik1	1513.82	1.27801	8.64653	5.3087e-18	4.79751e-15
Gadd45b	899.173	1.23111	8.63049	6.10874e-18	5.21381e-15
Mest	20506.8	1.1125	8.51324	1.69138e-17	1.36762e-14
Fosb	1158.57	0.901392	8.46396	2.58455e-17	1.98532e-14
Erf	1329.42	0.715848	8.21522	2.11783e-16	1.54935e-13
Csrnp1	650.353	1.10404	8.1976	2.45228e-16	1.71247e-13
Pvr	770.863	1.15168	7.87503	3.40651e-15	2.2754e-12
Klf14	581.506	0.989419	7.72843	1.08877e-14	6.86956e-12
Zdbf2	3048.06	1.0673	7.72508	1.11787e-14	6.86956e-12
Egr4	65.2191	1.14055	7.47204	7.89605e-14	4.66565e-11
AK039878	385.675	0.894425	7.43449	1.0497e-13	5.97277e-11
Gm29766	287.228	0.667171	7.3605	1.83226e-13	1.00532e-10
Pard6a	769.074	0.678588	7.25087	4.14098e-13	2.19372e-10
Lonrf1	693.444	0.847938	7.15786	8.19483e-13	4.19657e-10
Serpine1	315.53	1.02785	7.14137	9.24074e-13	4.57953e-10
Hlf	1627.66	0.583161	6.98231	2.90374e-12	1.39407e-09
Midn	3756.98	0.952515	6.91273	4.75416e-12	2.21328e-09
Fam13c	886.661	1.02095	6.86036	6.86863e-12	3.10361e-09
AK017280	1018.38	0.623953	6.77025	1.28563e-11	5.6432e-09
Dos	11525.9	0.855161	6.75549	1.42358e-11	6.07513e-09
Ptp4a1	3038.8	0.888233	6.74377	1.54326e-11	6.40789e-09
Skil	2170.88	0.564041	6.65209	2.88953e-11	1.16821e-08
Inpp5f	2458.49	0.652791	6.5557	5.5383e-11	2.18166e-08
Crem	2226.4	0.883318	6.48113	9.10372e-11	3.49651e-08
Zc3h12c	777.218	0.748306	6.47699	9.35686e-11	3.50608e-08
Mthfr	2303.54	0.432278	6.39717	1.58279e-10	5.78963e-08
Pmepa1	1008.12	0.556656	6.35476	2.08757e-10	7.45843e-08
Fem1c	794.837	0.453716	6.3315	2.42787e-10	8.47714e-08
Mir335	55.4843	0.972186	6.2605	3.83748e-10	1.27664e-07
Nfkbiz	379.442	0.78462	6.25782	3.90401e-10	1.27664e-07
Nap1l5	7190.93	0.658868	6.25775	3.90563e-10	1.27664e-07
Nfil3	577.865	0.910035	6.20248	5.55811e-10	1.77894e-07
BC057675	533.058	0.902069	6.16699	6.96029e-10	2.18226e-07
Amigo2	1089.73	0.750486	6.1334	8.60198e-10	2.64304e-07
Sertad1	352.775	0.693545	6.10813	1.00807e-09	3.03666e-07
Grasp	138.628	0.769023	6.08585	1.15877e-09	3.39801e-07
Trib1	674.583	0.746764	6.08399	1.17226e-09	3.39801e-07
Plk5	455.813	0.690332	6.04441	1.49958e-09	4.2663e-07
Cry2	2090.87	0.548927	5.98638	2.14569e-09	5.99349e-07
Parp16	282.087	-0.525446	-5.94924	2.69396e-09	7.3906e-07
Vgf	756.755	0.882677	5.92241	3.17255e-09	8.55085e-07
Gstt1	939.084	0.476046	5.85717	4.70832e-09	1.24714e-06
Tmem198	1172.92	0.639857	5.85327	4.82011e-09	1.25511e-06
Fndc4	898.977	0.73328	5.84983	4.92079e-09	1.25997e-06
Zfp39	471.545	-0.658413	-5.84583	5.04053e-09	1.26947e-06
Gpr3	51.9809	0.844178	5.80544	6.41964e-09	1.59072e-06
Sec14l1	2704.33	0.496016	5.79135	6.98237e-09	1.7027e-06
Syt4	9484.96	0.651301	5.77849	7.53746e-09	1.80934e-06
Gprc5a	123.171	0.792333	5.70312	1.17637e-08	2.73827e-06
AK216824	706.275	0.819772	5.69171	1.25774e-08	2.86004e-06
AK013890	48.303	0.870547	5.6906	1.26592e-08	2.86004e-06
Irs2	1351.97	0.762347	5.68231	1.32886e-08	2.95874e-06
Fam46a	8025.2	0.702886	5.67573	1.38099e-08	3.03088e-06
Trp53inp2	3726.16	0.492645	5.67277	1.40508e-08	3.04033e-06
Cdh13	1031.14	0.851335	5.65371	1.57017e-08	3.35034e-06
Rbsn	1301.64	-0.336479	-5.59471	2.20996e-08	4.6509e-06
Dusp5	118.217	0.799098	5.58331	2.35986e-08	4.85751e-06
Fosl2	6864.32	0.804261	5.58246	2.37137e-08	4.85751e-06
Gls2	325.991	0.671487	5.57964	2.41017e-08	4.87202e-06
Tfap4	187.336	-0.683964	-5.56265	2.6571e-08	5.30144e-06
Clu	22726.4	0.621978	5.56028	2.69339e-08	5.30495e-06
Klf4	141.205	0.848391	5.54095	3.00835e-08	5.85029e-06
Mgp	3002.31	0.49138	5.47354	4.41138e-08	8.4715e-06
Phlda1	294.674	0.735567	5.45628	4.86204e-08	9.22168e-06
Zfp354c	1211.08	-0.498025	-5.45224	4.97397e-08	9.31891e-06
Hdac5	4104.49	0.434578	5.44809	5.09132e-08	9.39909e-06
Siah2	417.046	0.576641	5.44643	5.13912e-08	9.39909e-06
Atf3	287.147	0.611089	5.43856	5.37133e-08	9.7082e-06
Ubc	49076.2	-0.421536	-5.43625	5.44151e-08	9.72068e-06
Polr3e	1391.1	-0.387244	-5.39645	6.79714e-08	1.20028e-05
Cd68	212.118	0.516886	5.35446	8.58109e-08	1.48125e-05
Mcl1	3132.12	0.342564	5.35029	8.78129e-08	1.49897e-05
Lysmd4	515.546	-0.399741	-5.31663	1.05708e-07	1.76521e-05
AK205396	265.247	0.78247	5.31221	1.08304e-07	1.78912e-05
Srrd	362.461	0.707006	5.30331	1.13723e-07	1.85864e-05
Rorc	2136.4	0.514233	5.30042	1.15534e-07	1.86837e-05
Nedd9	271.384	0.581564	5.26355	1.41298e-07	2.2612e-05
Mxi1	1273.9	0.364988	5.25344	1.49287e-07	2.36442e-05
Cpeb4	2630.15	0.539663	5.24933	1.5265e-07	2.39302e-05
Homer1	524.813	0.809059	5.19945	1.99876e-07	3.07069e-05
Jrk	353.205	-0.437707	-5.17404	2.29088e-07	3.48463e-05
Dclre1b	263.516	-0.413542	-5.16727	2.37544e-07	3.57783e-05
Nab2	1288.96	0.631343	5.15395	2.55062e-07	3.80439e-05
Gdnf	112.694	0.772866	5.14824	2.62947e-07	3.8794e-05
Arhgap23	997.104	0.488178	5.11349	3.1626e-07	4.58368e-05
Spry4	190.186	0.675778	5.10547	3.29967e-07	4.73765e-05
Bcl2l11	731.303	0.568333	5.08697	3.63837e-07	5.1281e-05
Bcor	1369.79	0.541065	5.07849	3.80449e-07	5.31349e-05
Rgs2	3099.85	0.689148	5.07619	3.85082e-07	5.32975e-05
Pim2	1012.36	0.366891	5.06545	4.07434e-07	5.58876e-05
Nmb	335.628	0.754202	5.05715	4.25561e-07	5.78575e-05
Plk3	191.166	0.696078	5.0535	4.33797e-07	5.84397e-05
Cwc22	555.511	-0.350144	-5.05189	4.37451e-07	5.84397e-05
Engase	238.535	-0.510195	-5.04321	4.57788e-07	6.06293e-05
Bag3	1370.62	0.725327	5.03886	4.68309e-07	6.14926e-05
Cpe	26650.4	0.419196	5.01809	5.21889e-07	6.79473e-05
Scg2	65531.8	0.622585	4.98193	6.2952e-07	8.12715e-05
Arc	491.457	0.74384	4.96982	6.70138e-07	8.57944e-05
Cabp1	343.473	0.580328	4.96551	6.85215e-07	8.69997e-05
Traf4	414.883	0.414738	4.91498	8.87896e-07	0.000111809
Ypel4	1187.21	0.409456	4.89934	9.61574e-07	0.000118257
Dnajb1	1760.77	0.628794	4.89922	9.62187e-07	0.000118257
Zfp862-ps	1101.99	-0.364521	-4.89518	9.82168e-07	0.000119332
Oxnad1	930.336	0.404659	4.89432	9.86476e-07	0.000119332
Kctd11	907.668	-0.435592	-4.8851	1.03375e-06	0.000123801
Zrsr1	1746.5	0.385022	4.884	1.03954e-06	0.000123801
Dmrta1	298.372	-0.758193	-4.86993	1.11636e-06	0.000131928
Pcsk1	4309.18	0.584476	4.8641	1.14979e-06	0.000134778
Il33	455.114	0.580301	4.86269	1.15802e-06	0.000134778
Rnf219	572.19	-0.442028	-4.85658	1.1943e-06	0.000137956
Ell2	1289.95	0.546057	4.85242	1.21965e-06	0.000139832
Cwc25	1219.66	0.727924	4.84842	1.24451e-06	0.00014089
Ccdc115	722.125	-0.340456	-4.84799	1.24722e-06	0.00014089
Sdad1	1073.53	-0.406628	-4.82378	1.40863e-06	0.00015735
Kif18a	324.723	0.729953	4.8231	1.41341e-06	0.00015735
5730409E04Rik	927.416	-0.332681	-4.81287	1.48777e-06	0.000164436
Exosc4	825.671	-0.349507	-4.80914	1.51584e-06	0.000166342
C230071H18Rik	180.009	0.626206	4.80587	1.54081e-06	0.0001667
Chga	47529.8	0.670399	4.79357	1.63836e-06	0.000174793
Rab3b	2844.68	0.511126	4.78404	1.7181e-06	0.000182035
Rpa2	464.539	-0.375558	-4.77553	1.79236e-06	0.000188603
AK154635	150.072	0.695215	4.7691	1.85054e-06	0.000193401
Oxsm	456.679	-0.399886	-4.7648	1.89037e-06	0.000196228
Ung	516.158	-0.460103	-4.73031	2.24178e-06	0.000229603
Usp27x	326.965	0.473879	4.72608	2.28892e-06	0.000232879
Errfi1	1121.93	0.73497	4.71105	2.46447e-06	0.000249089
B230216N24Rik	177.542	0.700579	4.70533	2.5346e-06	0.000252851
Gale	1359.4	-0.624077	-4.6935	2.68573e-06	0.0002662
Pde4b	634.012	0.582562	4.68905	2.74477e-06	0.000270307
Commd5	561.832	-0.43748	-4.68515	2.79754e-06	0.000273749
Fbxo33	1038.21	0.411318	4.67715	2.90887e-06	0.000282842
Ifrd1	1800.69	0.592872	4.67327	2.96447e-06	0.000286435
Ttc30a1	534.061	-0.451112	-4.66462	3.09187e-06	0.000296877
Cited2	1568	-0.691958	-4.65751	3.20053e-06	0.000305402
Tagln	329.106	0.623314	4.65342	3.26478e-06	0.00030961
Mbip	504.909	-0.347682	-4.64995	3.32014e-06	0.000311485
Kctd7	362.984	-0.463061	-4.64964	3.3251e-06	0.000311485
Cebpd	794.888	0.647833	4.63845	3.5104e-06	0.00032685
Npas4	615.179	0.704177	4.63704	3.53434e-06	0.000327097
Serpinb11	217.073	0.635683	4.62212	3.79844e-06	0.000347353
Mfhas1	1050.82	0.503762	4.61725	3.88858e-06	0.000353493
Egr2	94.6903	0.700405	4.61447	3.94104e-06	0.000353588
Ttc30b	650.256	-0.408252	-4.61432	3.94382e-06	0.000353588
Hey1	667.164	0.447451	4.61354	3.95867e-06	0.000353588
Col17a1	187.557	0.683049	4.60732	4.07894e-06	0.000362224
Gm13889	172.128	0.695369	4.5996	4.2331e-06	0.000371649
Prox1	643.205	0.53989	4.59958	4.23346e-06	0.000371649
Acta2	180.255	0.663935	4.57525	4.75662e-06	0.000410773
Arfgap1	4829.51	-0.35979	-4.57513	4.75933e-06	0.000410773
Gla	497.309	0.364621	4.56748	4.93617e-06	0.000418974
Jade1	1476.23	0.477968	4.56158	5.0771e-06	0.000428569
Copg2	3245.02	0.338363	4.55945	5.12869e-06	0.000430558
Ccdc184	387.378	0.424215	4.55483	5.24286e-06	0.00043775
Zbtb21	857.745	0.455367	4.53666	5.71533e-06	0.000474468
Gch1	204.517	0.672394	4.53209	5.84025e-06	0.000479806
Irf2bp2	1073.55	0.326704	4.52909	5.92371e-06	0.000484074
Tuba4a	2737.57	0.39091	4.52536	6.02941e-06	0.000490105
AK021342	63.3108	0.692557	4.52405	6.06672e-06	0.000490542
Emd	2749.96	0.552919	4.52023	6.17715e-06	0.000496856
Cpa4	186.004	0.661618	4.51469	6.34109e-06	0.000507387
AK085136	2906.33	0.624348	4.51076	6.45958e-06	0.000512099
AK083547	559.559	0.456983	4.51053	6.46666e-06	0.000512099
Srf	1274.75	0.402282	4.50563	6.61754e-06	0.00052136
Harbi1	427.365	-0.371155	-4.48965	7.13394e-06	0.000559177
Zfp612	2905.17	0.38503	4.48097	7.43051e-06	0.000573683
Spata2l	369.39	0.501451	4.48095	7.43103e-06	0.000573683
Nr2c1	544.34	-0.355076	-4.47437	7.66364e-06	0.000583286
Tiparp	746.65	0.662494	4.47336	7.69986e-06	0.000583286
Zfp280b	623.754	-0.408983	-4.47053	7.80256e-06	0.000587602
BC049150	214.756	-0.417769	-4.45893	8.23714e-06	0.000611339
Slc39a7	6526.33	-0.355307	-4.45702	8.31079e-06	0.000613272
Arid5b	1193.26	0.493398	4.45202	8.50678e-06	0.000622332
Usp2	1793.07	0.535149	4.44677	8.71709e-06	0.000634695
Zfp184	186.008	0.613554	4.42601	9.5994e-06	0.000695639
Rnd1	181.598	0.607221	4.42205	9.77675e-06	0.000705165
Cfap97	1264.94	-0.337694	-4.41861	9.93375e-06	0.000713141
Scn9a	117.673	0.55031	4.39951	1.08493e-05	0.000775248
B3galt6	459.475	-0.376753	-4.37953	1.18937e-05	0.000836565
Emilin1	703.225	-0.536476	-4.3778	1.19883e-05	0.000836565
Igfbp4	1582.28	0.507381	4.37697	1.20342e-05	0.000836565
Nrep	2265.98	-0.584903	-4.37438	1.2178e-05	0.000839272
Telo2	759.838	-0.324009	-4.36758	1.25633e-05	0.000861652
AK051222	48.0049	0.63819	4.36511	1.27058e-05	0.000867555
Galnt13	673.954	0.601004	4.35729	1.31683e-05	0.000891213
Pars2	211.106	-0.457488	-4.35404	1.33652e-05	0.000900571
Mat2a	4341.04	0.419473	4.33588	1.45176e-05	0.00097395
Fam110a	621.344	0.499782	4.33012	1.49028e-05	0.000995442
Fat4	306.101	0.557822	4.32647	1.51521e-05	0.00100771
AK040485	462.399	0.347473	4.31628	1.58681e-05	0.00105078
Thsd7b	672.559	0.391406	4.30435	1.6748e-05	0.00110429
Syt13	3105.88	0.363334	4.30295	1.6854e-05	0.00110653
Nap1l3	760.303	0.408167	4.29754	1.72703e-05	0.00112904
Fam107b	293.719	0.606282	4.2899	1.78756e-05	0.00116365
Taf13	254.923	0.468247	4.28491	1.82811e-05	0.00118005
Mycn	345.315	-0.64694	-4.27029	1.95215e-05	0.00125042
Amer2	623.465	0.512488	4.27015	1.95341e-05	0.00125042
Jam2	4091.23	0.528842	4.26908	1.96279e-05	0.00125122
Tha1	384.551	-0.347057	-4.24405	2.1952e-05	0.00137652
Klf2	189.886	0.556437	4.23786	2.25658e-05	0.00140926
Dpp3	1659.54	-0.389386	-4.23583	2.27704e-05	0.00141065
Pus1	417.516	-0.440056	-4.23582	2.27717e-05	0.00141065
Rel	60.846	0.616385	4.23116	2.32489e-05	0.00143443
Mettl13	718.357	-0.359644	-4.22312	2.40947e-05	0.00147537
Mfsd10	1254.85	-0.344785	-4.20754	2.58169e-05	0.00156152
Klk1b26	431.999	0.605222	4.20158	2.65059e-05	0.0015969
Gm16793	86.8202	0.624437	4.19336	2.74854e-05	0.00164944
Gltscr2	3609.92	0.333977	4.18456	2.85721e-05	0.0016948
Zfp937	416.759	-0.385288	-4.18091	2.90349e-05	0.00171562
Cys1	66.3493	0.556218	4.17328	3.00248e-05	0.00176732
Arg1	223.429	0.627206	4.14337	3.42237e-05	0.00197661
Fcrls	162.564	0.491322	4.13128	3.60749e-05	0.00207572
AK170928	95.5755	0.560731	4.12808	3.65807e-05	0.00208918
Rbms2	1059.62	0.336901	4.12511	3.70557e-05	0.00210242
Atp2b2	1548.62	0.394443	4.12492	3.70862e-05	0.00210242
Uck2	844.803	0.588386	4.11845	3.81434e-05	0.0021544
Frat1	243.166	-0.549435	-4.11711	3.83658e-05	0.00215903
Zfp41	273.245	-0.358285	-4.10916	3.97098e-05	0.00221841
Tspan4	365.744	0.428078	4.10599	4.02594e-05	0.00223287
Mcm7	703.965	-0.373247	-4.10228	4.09102e-05	0.00226081
Zfp128	188.999	-0.446131	-4.10116	4.11082e-05	0.00226361
Klk1b16	222.547	0.62849	4.0939	4.24176e-05	0.00232234
Stk32a	1592.43	-0.374792	-4.08774	4.35596e-05	0.00235636
1700052N19Rik	468.188	-0.324479	-4.08598	4.38917e-05	0.00236599
Nrde2	448.072	-0.38424	-4.08445	4.41815e-05	0.00237329
Zdhhc12	450.466	-0.420829	-4.07783	4.54581e-05	0.00243336
Ptchd2	605.215	0.521493	4.07437	4.61383e-05	0.00245268
C1qtnf6	156.37	-0.622024	-4.07313	4.63847e-05	0.00245727
Mthfd1l	222.665	0.433692	4.06992	4.70289e-05	0.00248283
Nespas	245.584	0.606213	4.06452	4.81313e-05	0.00252369
Dusp4	65.3309	0.621632	4.06144	4.87716e-05	0.00254856
Cyp51	1030.51	0.363951	4.05079	5.10456e-05	0.00265835
3110056K07Rik	336.359	0.357036	4.0484	5.15698e-05	0.00267658
A830010M20Rik	1738.69	0.419948	4.04622	5.20507e-05	0.00269244
Map3k14	283.537	0.395717	4.04248	5.28899e-05	0.00272667
Ier3	132.641	0.570289	4.03579	5.44184e-05	0.00279609
Exo5	323.236	-0.333647	-4.03078	5.55921e-05	0.00284308
Tbkbp1	373.556	0.375503	4.02953	5.58882e-05	0.00284308
Bdnf	494.144	0.616179	4.02849	5.61351e-05	0.00284622
Trim16	499.495	-0.599411	-4.02464	5.70615e-05	0.00288367
Rbm12b1	985.095	0.322803	4.01162	6.03037e-05	0.00301774
Ryr3	302.979	0.6016	4.01048	6.05966e-05	0.00302255
B3gnt9	1597.18	-0.563282	-4.00292	6.2566e-05	0.00309928
Cybrd1	528.85	0.404679	4.00271	6.262e-05	0.00309928
Amer3	269.651	-0.394461	-4.00142	6.29629e-05	0.00310032
N6amt1	477.069	-0.330442	-3.99733	6.40618e-05	0.00314435
Qpct	829.378	0.385058	3.99428	6.48913e-05	0.00315483
Cdc25a	862.096	-0.359244	-3.99115	6.5754e-05	0.00318669
Trim67	196.536	0.534369	3.9855	6.73396e-05	0.00323293
Lrrc7	178.273	0.529683	3.9823	6.82505e-05	0.00326645
Tmc7	104.123	0.567004	3.97803	6.94885e-05	0.00328678
Cdk5rap2	2464.04	0.421733	3.97789	6.95309e-05	0.00328678
Zfp46	663.489	-0.35581	-3.97553	7.02229e-05	0.00330931
Lox	781.215	0.563146	3.97177	7.13413e-05	0.00334151
Arl5b	317.089	0.448543	3.9569	7.59294e-05	0.00351608
Galr3	122.502	-0.619114	-3.95673	7.59838e-05	0.00351608
Tob2	1137.6	0.40853	3.95397	7.68663e-05	0.00352977
Hbegf	88.7133	0.593584	3.95357	7.69942e-05	0.00352977
Scn11a	205.324	-0.598978	-3.95327	7.70913e-05	0.00352977
Mme	776.733	0.519711	3.95173	7.75877e-05	0.00353703
Pms2	371.759	-0.376814	-3.944	8.01347e-05	0.00361237
Ano4	282.353	-0.577099	-3.94386	8.01808e-05	0.00361237
6330419J24Rik	298.885	-0.344211	-3.93392	8.35722e-05	0.0037285
Tpm4	3120.92	0.407554	3.93277	8.3972e-05	0.0037285
Exog	597.691	-0.392223	-3.91651	8.9839e-05	0.00395472
Zfp960	325.491	-0.402312	-3.9082	9.29873e-05	0.00406998
Foxn2	381.963	-0.427763	-3.90337	9.48615e-05	0.00414022
Nif3l1	672.838	-0.384052	-3.90204	9.53862e-05	0.00415132
Zfp786	140.115	-0.496321	-3.90001	9.61892e-05	0.00417445
Procr	38.9227	0.602592	3.89826	9.6887e-05	0.00419289
P2ry1	105.592	0.527842	3.89733	9.72583e-05	0.00419713
Tbc1d7	368.539	-0.433323	-3.89181	9.9499e-05	0.00426984
Nupl2	288.968	-0.348556	-3.8894	0.000100492	0.00429601
Rassf7	247.052	-0.420812	-3.88898	0.000100668	0.00429601
Per2	1217.14	0.46251	3.88681	0.000101571	0.00432252
Ces1d	1808.8	0.448649	3.88295	0.000103198	0.00435634
Serpina3n	123.999	0.322933	3.8829	0.000103216	0.00435634
Maff	76.1335	0.582778	3.8772	0.000105665	0.00444746
Cdk5rap3	2733.32	-0.331553	-3.87403	0.000107052	0.00445703
Axin2	856.95	-0.47367	-3.87022	0.000108738	0.00451498
Kif26a	182.266	0.562449	3.86166	0.000112618	0.00465096
Dnajc17	170.591	-0.382633	-3.85973	0.000113511	0.00466729
Peo1	807.369	-0.519613	-3.8595	0.000113621	0.00466729
AK045867	82.215	0.571935	3.85763	0.000114493	0.00469054
Lgalsl	809.931	-0.322632	-3.85487	0.000115789	0.00471847
4930427A07Rik	219.872	-0.395351	-3.84835	0.000118917	0.00482874
Nkain1	540.991	0.402178	3.84505	0.00012053	0.00487289
Fen1	432.446	-0.455317	-3.84054	0.000122765	0.00495023
Lonrf3	168.644	0.451811	3.83746	0.000124313	0.00498545
Nudt22	301.337	-0.378346	-3.82663	0.000129911	0.00517052
AK044689	96.0171	0.48093	3.81259	0.000137519	0.00543111
Rn4.5s	1922.89	0.412787	3.81028	0.000138811	0.0054681
Armc6	588.647	-0.392932	-3.80901	0.000139524	0.00548213
Itgav	963.886	0.336754	3.80582	0.000141336	0.00552505
Parvg	56.1539	0.542463	3.79771	0.000146039	0.00565312
Abca8a	1104.53	0.502224	3.79763	0.000146084	0.00565312
Ehhadh	294.286	-0.443304	-3.79034	0.000150443	0.00579979
Dusp6	482.142	0.429887	3.78941	0.000151007	0.00579979
Spata7	903.885	0.373145	3.78257	0.000155218	0.00593189
Zfp764	417.716	-0.356366	-3.77107	0.000162547	0.00616594
Fam65a	1444.7	0.333684	3.766	0.000165886	0.00627712
Pop7	373.122	-0.329177	-3.75597	0.000172671	0.00650183
Tbl2	1485.84	-0.323691	-3.75021	0.000176686	0.00659262
Hs6st2	333.766	0.550897	3.7502	0.000176693	0.00659262
C030037D09Rik	92.1939	0.449315	3.75005	0.000176799	0.00659262
Zc3hav1l	457.896	-0.323706	-3.74743	0.000178655	0.00661368
E430018J23Rik	284.297	-0.395187	-3.73922	0.000184591	0.0067844
Cacna1i	851.871	0.458548	3.72694	0.000193816	0.00705592
Cd302	188.719	0.444644	3.7256	0.000194852	0.00706017
Scn1b	653.774	0.39855	3.72382	0.000196231	0.00709339
Crisp1	206.336	0.562718	3.72262	0.000197167	0.00711051
Wdr5b	297.59	-0.37533	-3.71059	0.00020678	0.00742234
Stk40	1600.99	0.350784	3.70307	0.000213006	0.00761026
Ppcs	336.534	-0.384459	-3.70218	0.000213751	0.00761916
Zfp759	225.261	-0.378502	-3.69987	0.000215711	0.00767122
Gper1	962.621	0.423032	3.69802	0.000217287	0.00769167
Tinf2	886.21	0.529482	3.68927	0.000224898	0.00790644
Zc2hc1c	360.171	-0.391424	-3.68055	0.000232731	0.00812603
Klhl29	376.76	0.47821	3.67272	0.000239979	0.00836008
1190002N15Rik	579.79	0.406424	3.66691	0.000245495	0.0085329
Enho	590.242	0.473447	3.66303	0.000249247	0.00862427
Gosr2	5396.42	-0.322332	-3.66116	0.000251074	0.00864853
Trem2	97.285	0.489856	3.65329	0.000258899	0.00885851
Odc1	7802.53	0.522913	3.65138	0.000260834	0.00888513
Gm6225	136.758	0.552582	3.64717	0.000265143	0.0090067
AK046721	121.493	-0.547723	-3.64346	0.000269001	0.00910278
Tor3a	1855.82	0.390984	3.64046	0.00027215	0.0091627
Efnb2	727.092	0.390615	3.6404	0.000272217	0.0091627
Rgs16	973.244	-0.329229	-3.63551	0.000277427	0.00924536
Siah1b	183.977	-0.348919	-3.63206	0.000281169	0.00930451
AI854703	164.712	0.487227	3.62927	0.000284223	0.00932353
Gcnt2	587.978	0.4541	3.6289	0.000284628	0.00932353
D030047H15Rik	94.3379	0.535257	3.62144	0.000292972	0.00957355
D11Wsu47e	343.456	-0.336306	-3.61908	0.000295652	0.00959088
Narf	920.108	-0.372446	-3.61828	0.000296573	0.00959088
Thrb	3788.75	-0.530119	-3.61743	0.00029754	0.00959088
Col24a1	430.685	-0.484615	-3.61669	0.000298389	0.00959088
Gyltl1b	840.766	-0.338459	-3.61285	0.000302847	0.00971323
Zfp94	268.441	-0.342058	-3.61042	0.000305703	0.0097438
Cnot8	515.294	-0.392273	-3.60491	0.000312257	0.00989031
Sorcs1	240.708	0.462448	3.60359	0.000313847	0.00990068
Nrgn	69.4147	0.552777	3.60197	0.000315817	0.00994241
Mettl7a1	5011.35	0.331453	3.59707	0.000321823	0.0100828
Tmem202	34.2106	0.544378	3.59146	0.000328825	0.0102469
Jun	738.778	-0.536935	-3.58815	0.000333035	0.0103207
Trabd	2576.27	-0.420781	-3.58537	0.000336605	0.0103632
C1qa	813.982	0.386006	3.57597	0.000348932	0.0107213
2810454H06Rik	114.832	-0.413226	-3.57481	0.000350486	0.0107475
Noxred1	40.127	0.552244	3.57389	0.000351723	0.010764
Ifrd2	541.507	-0.428887	-3.56818	0.000359468	0.0109357
Tat	48.5546	0.545103	3.56415	0.000365032	0.0110033
A430033K04Rik	596.916	-0.337348	-3.56347	0.00036599	0.0110033
Ttll13	104.686	0.483987	3.55148	0.000383078	0.0113842
Gdpgp1	170.587	-0.400854	-3.54871	0.000387128	0.0114594
AK216726	80.7181	-0.540339	-3.54293	0.000395703	0.0116907
Gm7694	470.625	0.38178	3.53431	0.000408847	0.0119869
Zfp658	441.469	-0.345709	-3.5338	0.000409632	0.011987
Fpgs	681.933	-0.37965	-3.53264	0.000411436	0.0120169
Jmy	1202.66	0.352326	3.52812	0.000418527	0.0122008
Bambi	319.905	0.35403	3.52734	0.000419762	0.0122136
Adam23	621.812	0.355789	3.52232	0.000427786	0.0123535
Pus7l	78.8963	-0.492414	-3.52143	0.000429231	0.012372
Cbx4	1413.35	0.521329	3.52092	0.000430056	0.0123726
Pde7b	1110.47	-0.515897	-3.51632	0.000437577	0.012542
Sulf1	2087.31	0.364649	3.51393	0.000441522	0.0126169
4931440P22Rik	47.1271	0.538801	3.51361	0.000442061	0.0126169
Cck	190.431	0.493793	3.51325	0.000442656	0.0126169
Polm	821.242	-0.475992	-3.511	0.000446431	0.012664
Ap1s2	1427.31	0.388372	3.51079	0.000446779	0.012664
Hmgcr	1826.16	0.324837	3.50859	0.000450493	0.0127457
Gorasp1	1723.99	-0.377655	-3.50514	0.000456376	0.0128884
Ngfr	177.291	0.482248	3.5034	0.000459355	0.0129487
Tldc1	413.055	-0.32871	-3.49712	0.000470317	0.0131098
Itprip	301.048	0.498181	3.49671	0.000471041	0.0131098
Rasl10b	1737.9	0.368878	3.48305	0.000495734	0.0136998
Chil1	91.4017	0.528728	3.48269	0.000496411	0.0136998
Shpk	378.969	-0.351666	-3.48253	0.000496699	0.0136998
Asphd2	1260.66	0.479524	3.47575	0.00050943	0.0140007
Zfp300	116.963	-0.433769	-3.47172	0.000517129	0.0141616
Plk2	882.638	0.358529	3.46429	0.000531629	0.014507
Palld	270.277	0.338127	3.45996	0.000540246	0.0146579
Vps37b	934.164	0.506674	3.4596	0.000540975	0.0146579
Pde4a	1172.14	0.339591	3.45606	0.000548138	0.0148158
Gne	1387.68	-0.324643	-3.45577	0.000548732	0.0148158
Stbd1	533.005	-0.440922	-3.4531	0.000554184	0.0149367
AK086087	117.183	0.437245	3.44218	0.000577046	0.0153856
Cbr2	574.837	0.410805	3.43535	0.000591786	0.0157023
Etv4	73.0035	0.515179	3.42989	0.000603823	0.0159391
Slc3a2	3345.89	0.324014	3.42803	0.00060797	0.016021
P3h1	1410.92	-0.436866	-3.42659	0.00061122	0.0160723
AK006963	61.4626	0.483377	3.42122	0.000623418	0.0162882
Rnf26	445.466	-0.329425	-3.41985	0.000626554	0.0162973
Prdm1	106.9	0.514924	3.41858	0.000629499	0.0163361
Fgd5	128.093	0.397829	3.41684	0.000633532	0.0164002
C77370	2661.04	-0.48498	-3.40877	0.000652568	0.0167787
Fcgr3	145.999	0.429046	3.40863	0.000652906	0.0167787
Gm5069	161.143	0.442296	3.40277	0.000667068	0.0169953
Sac3d1	369.675	-0.348104	-3.39882	0.000676774	0.0172016
2310039H08Rik	888.67	-0.372888	-3.39536	0.000685389	0.0172617
Col23a1	666.179	0.488291	3.39373	0.000689472	0.0173361
Mgat4c	103.879	0.431213	3.38864	0.000702391	0.0175461
Rap2b	345.795	0.378768	3.3819	0.000719872	0.0178666
Rarb	579.817	0.340529	3.37533	0.000737264	0.0181807
Espn	353.696	0.501762	3.36623	0.000762044	0.0185535
Rxfp1	1047.6	-0.497568	-3.36215	0.000773379	0.0187404
Gm4477	54.6469	0.499562	3.35979	0.000780011	0.0188121
Tmem177	429.29	-0.328628	-3.35914	0.000781844	0.0188268
Arpp21	258.968	0.511603	3.35612	0.000790448	0.0189745
Sh3gl3	70.3171	0.46967	3.35352	0.0007979	0.0190416
Ankrd9	100.779	0.445763	3.34894	0.000811205	0.01914
Chst14	295.823	-0.421845	-3.34164	0.000832861	0.0195049
Stat5a	3061.54	-0.447965	-3.33912	0.000840432	0.0196523
Ky	725.416	-0.378604	-3.33755	0.000845217	0.0197342
Fam132b	175.649	-0.518449	-3.33285	0.000859617	0.019919
Gpr52	281.37	-0.50851	-3.33029	0.000867565	0.0200147
Rpp38	278.212	-0.370366	-3.32576	0.000881777	0.0201889
Myc	625.172	-0.538717	-3.31873	0.000904274	0.0205205
Trpc3	192.905	0.482667	3.31699	0.000909945	0.0205719
Slc16a3	128.172	0.476489	3.3168	0.000910557	0.0205719
AK040719	106.819	0.383006	3.31429	0.000918773	0.020727
Polr1b	689.779	-0.366554	-3.31371	0.000920658	0.0207391
Avpi1	331.736	0.364706	3.31166	0.000927447	0.020831
Rpf2	280.292	-0.332059	-3.31041	0.000931584	0.020831
AK082338	51.5034	-0.470915	-3.30874	0.000937167	0.0208662
Grik1	490.075	0.487015	3.30265	0.000957742	0.0211441
Cacna1f	138.412	-0.509079	-3.2995	0.00096856	0.0212669
Dock5	421.88	0.340269	3.29937	0.000969004	0.0212669
Filip1l	102.223	0.457462	3.29738	0.000975903	0.0213573
BC031727	83.4245	-0.447793	-3.2959	0.000981075	0.0214095
AK005187	492.744	0.344204	3.29508	0.000983949	0.0214417
Cgref1	508.587	-0.512323	-3.29375	0.000988602	0.0215126
Smad6	164.479	0.456569	3.29255	0.000992835	0.0215741
Cdkn1c	464.222	0.413613	3.28447	0.00102174	0.0219231
AK039132	77.1374	0.481196	3.28243	0.00102917	0.0220004
Cep72	117.313	0.463512	3.2823	0.00102964	0.0220004
Degs2	294.167	0.356378	3.2804	0.0010366	0.0220879
Pdp1	568.612	0.360289	3.27762	0.00104686	0.0222756
Fam185a	772.839	-0.372621	-3.26802	0.00108303	0.0228551
N4bp2l1	677.485	0.380778	3.26653	0.00108875	0.0229445
Fzd5	776.272	0.339319	3.25556	0.00113167	0.0234945
Cst6	200.426	0.493359	3.25476	0.00113489	0.0235091
Arrdc2	206.675	-0.363518	-3.25271	0.00114309	0.0235406
Gmpr2	982.853	0.347101	3.25128	0.00114886	0.0236209
Rad51c	260.684	0.322749	3.25092	0.00115031	0.0236209
Plaur	33.2424	-0.452575	-3.2506	0.0011516	0.0236209
Nrip3	740.617	0.482101	3.24753	0.00116413	0.023789
Shq1	203.576	-0.325994	-3.24338	0.0011812	0.023972
Spp1	2012.18	0.496397	3.24247	0.00118497	0.0239765
Kcnd2	605.717	0.343016	3.2422	0.0011861	0.0239765
Trim3	2050.37	-0.400358	-3.24023	0.00119434	0.0240956
Unc5b	152.279	0.492904	3.23858	0.00120128	0.0241561
Nefm	359.49	0.427379	3.23656	0.00120982	0.0242326
Amacr	500.421	-0.357463	-3.23298	0.00122505	0.0244372
Rab26	235.864	0.357549	3.23267	0.00122639	0.0244372
D030028A08Rik	336.856	0.456198	3.23034	0.00123641	0.0245929
Nrros	216.584	0.445126	3.23011	0.00123741	0.0245929
Slc7a3	68.5637	0.463723	3.22832	0.0012452	0.024684
Lima1	1214.41	0.341082	3.22601	0.00125527	0.0247892
Scn7a	1340.42	0.454394	3.22382	0.00126491	0.0248813
Pold2	1185.93	-0.410926	-3.22345	0.00126655	0.0248813
Gpr137c	93.4786	0.407159	3.221	0.00127742	0.024932
Vstm4	203.184	0.447134	3.21791	0.00129128	0.0250479
Apod	3944.86	0.459613	3.21189	0.00131863	0.025418
Rps6kl1	427.456	-0.422905	-3.2103	0.00132599	0.0254958
Arl4a	733.449	-0.37473	-3.20893	0.00133228	0.0255847
Msx1os	137.194	0.419991	3.20546	0.00134845	0.0258522
Ssr2	5521.44	-0.433472	-3.1967	0.00139011	0.0263599
Slitrk6	2697.96	0.459091	3.1964	0.00139152	0.0263599
C2cd4c	180.783	-0.493582	-3.19423	0.00140206	0.026527
Slc8a3	247.311	-0.470878	-3.19382	0.00140405	0.026532
Mrps18b	307.359	-0.360304	-3.19263	0.00140985	0.0265648
Peg10	1733.52	0.444586	3.19128	0.00141645	0.0265868
Gm15408	195.92	-0.408031	-3.19126	0.00141652	0.0265868
Thbs1	272.921	0.435445	3.19104	0.00141761	0.0265868
Rasal1	218.614	0.446107	3.18916	0.00142687	0.026672
Nr1d1	692.689	-0.3841	-3.18912	0.00142709	0.026672
Golph3l	2223.51	-0.415191	-3.18128	0.00146627	0.0272384
BC031451	127.609	0.42545	3.18093	0.00146803	0.0272384
Epas1	1732.32	0.365443	3.18039	0.00147076	0.0272561
Fam222a	1289.22	0.372048	3.17967	0.00147444	0.0272914
Map3k9	356.181	0.359005	3.17876	0.00147906	0.027344
Zfp81	144.955	-0.361334	-3.17607	0.00149286	0.027442
Gm9949_	56.2239	0.457253	3.17423	0.00150233	0.0275421
Fzd1	482.282	0.326521	3.17346	0.00150634	0.0275827
Rrp9	475.81	-0.322806	-3.16931	0.00152803	0.0278472
Klf11	166.954	-0.399483	-3.16481	0.00155182	0.02812
Fndc3c1	678.432	0.448845	3.16475	0.00155216	0.02812
Hist1h4k	168.747	0.383813	3.16289	0.00156212	0.0282671
Scel	202.784	0.469132	3.16051	0.00157492	0.0283457
G530011O06Rik	153.322	0.483633	3.15679	0.00159517	0.0285957
Adprhl1	115.66	-0.482171	-3.15563	0.00160151	0.028676
Kdelr3	743.463	-0.47581	-3.15262	0.00161815	0.0288686
Ypel1	249.253	0.470647	3.15208	0.00162114	0.0288686
Pak7	185.495	-0.495756	-3.15103	0.00162694	0.0288686
Dph5	184.304	-0.376758	-3.15097	0.0016273	0.0288686
AK008482	47.7985	0.489381	3.14393	0.00166698	0.0294337
Lrp2	171.61	0.450471	3.14038	0.00168731	0.0296592
Ccdc116	71.6013	-0.438632	-3.13999	0.00168956	0.0296648
AK030561	733.904	-0.485393	-3.13954	0.00169215	0.0296764
DQ548390	85.3943	0.433089	3.1356	0.001715	0.0299745
Arfgap3	2972.48	-0.375832	-3.13428	0.00172275	0.0300415
Tbx6	91.8003	0.474363	3.13051	0.00174504	0.030327
Rasgrp1	699.281	0.48113	3.12807	0.0017596	0.0305109
Nfatc2	269.302	0.378812	3.12263	0.00179244	0.0308825
Dpagt1	951.049	-0.329431	-3.11759	0.00182338	0.0312132
Pdzrn3	125.146	0.397578	3.11655	0.00182981	0.0312348
Msantd1	87.5207	0.422764	3.11622	0.00183184	0.0312348
Itgbl1	104.161	0.425558	3.1157	0.00183507	0.0312552
Dtwd1	186.201	-0.325771	-3.11488	0.00184017	0.0312727
AK081796	115.108	0.377721	3.11041	0.00186829	0.0317118
Prex2	466.643	0.334234	3.11012	0.00187014	0.0317118
AK134717	90.9044	0.366646	3.10699	0.00189003	0.0319659
Cyr61	297.296	0.468157	3.09399	0.00197482	0.0329419
Abcb1b	372.299	0.463741	3.09281	0.00198274	0.0330377
St8sia4	66.1704	0.450548	3.0922	0.00198679	0.0330693
2210404O09Rik	117.796	-0.349171	-3.09013	0.00200067	0.0332444
Tm6sf2	53.434	0.451985	3.08868	0.00201051	0.0333558
Snai2	165.211	-0.42887	-3.08829	0.00201311	0.0333628
Slc24a3	733.056	0.400886	3.0855	0.00203209	0.0335327
Dusp10	255.738	0.402341	3.08509	0.00203488	0.0335428
Ctsk	82.9249	0.407804	3.08416	0.0020413	0.0335766
Tefm	238.715	-0.343751	-3.07857	0.00207994	0.0340373
AK028782	303.446	0.385137	3.0754	0.0021022	0.034212
Epha5	258.912	0.402975	3.06828	0.00215298	0.0348708
Pdgfd	320.925	0.389357	3.06813	0.00215403	0.0348708
Pop1	213.762	-0.337385	-3.0658	0.00217087	0.0349959
Reln	4822.46	-0.424997	-3.06512	0.00217581	0.0350388
Sh3d19	1222.2	-0.440771	-3.06355	0.00218724	0.0350849
Ttc9	290.878	0.3381	3.06348	0.00218781	0.0350849
Sft2d2	2971.5	0.365546	3.06026	0.00221145	0.03539
Nmu	66.4356	0.459574	3.05667	0.0022381	0.0356184
Nxph1	90.9668	0.428619	3.05605	0.00224272	0.0356184
Ano7	670.341	-0.370394	-3.05108	0.00228023	0.0360774
Zbtb3	81.0254	-0.388705	-3.0494	0.00229297	0.0362332
Gabre	237.324	0.346492	3.04816	0.00230248	0.0362332
Ngef	238.805	0.439594	3.04744	0.00230796	0.0362548
Gldc	522.265	0.458368	3.04609	0.00231836	0.0363761
Trmt61a	582.782	-0.408972	-3.04073	0.00236006	0.0366613
Hspa13	2076.19	-0.323666	-3.03312	0.00242038	0.0371263
Gucy1a2	242.34	0.348597	3.03267	0.00242402	0.0371263
Krt18	2318.92	0.324675	3.03243	0.0024259	0.0371263
Tet1	716.249	-0.365348	-3.03192	0.00243	0.0371463
Junb	2940.19	0.35918	3.02975	0.00244758	0.0373037
Copz2	2010.84	-0.417853	-3.02919	0.00245214	0.0373361
Aif1	85.5921	0.425043	3.0288	0.00245525	0.0373466
Prrx1	719.84	0.378717	3.02702	0.00246979	0.0374565
A330009N23Rik	47.9793	0.449423	3.02018	0.00252626	0.0379782
2810021J22Rik	437.906	-0.336472	-3.01946	0.00253226	0.0380285
Tex30	185.285	0.331691	3.01685	0.0025542	0.0383136
Sntb2	261.556	0.400405	3.01251	0.00259094	0.0386077
Gm13304	63.254	0.446078	3.00902	0.00262095	0.038856
Rasl11b	297.124	0.443122	3.00665	0.00264148	0.038908
Rnf32	398.854	0.329179	3.00395	0.00266501	0.0390301
Esm1	3310.75	0.451028	3.00158	0.00268585	0.0391997
Shisa2	253.223	0.451629	2.99772	0.00272005	0.0394973
Aoc2	111.249	0.388672	2.99685	0.00272789	0.0394991
Zfp442	161.455	-0.33183	-2.99621	0.00273356	0.0395439
Gnat2	389.475	-0.421336	-2.99517	0.00274295	0.0396052
Cacna2d3	108.446	0.439068	2.99224	0.0027694	0.0398
Sec24d	3507.49	-0.356168	-2.98959	0.0027935	0.040109
Lrrc3b	212.241	-0.362693	-2.98843	0.00280417	0.0401122
Kazn	757.456	0.375139	2.98548	0.00283133	0.0403098
Dach2	262.369	-0.353962	-2.98489	0.00283682	0.0403164
Zfp78	210.934	-0.364551	-2.983	0.00285434	0.040528
Cpne7	628.607	0.445394	2.97856	0.00289605	0.0408934
Cdh8	135.486	0.39824	2.97589	0.00292138	0.0411083
E030030I06Rik	67.5564	0.401799	2.97583	0.00292197	0.0411083
Tssk6	40.6153	-0.437467	-2.97518	0.00292816	0.0411223
Fhdc1	152.92	0.410422	2.97516	0.00292832	0.0411223
Pla2g4a	77.5382	0.443027	2.9694	0.00298379	0.0417866
Hspa1a	668.72	0.447112	2.96571	0.00301985	0.0422531
A330023F24Rik	5256.85	0.331284	2.96327	0.00304389	0.0423964
Sh3rf3	131.603	0.404187	2.95883	0.00308804	0.0427995
Chil6	142.778	-0.451784	-2.95879	0.00308852	0.0427995
Klf13	1383.73	0.34289	2.95428	0.00313401	0.0431819
Pitx1	3294.57	0.34174	2.95066	0.00317098	0.0436131
Lhx2	96.009	0.452631	2.94981	0.00317966	0.0436494
Cebpb	229.409	0.427727	2.94845	0.00319372	0.043769
Fam46c	504.91	0.34493	2.94654	0.00321349	0.043923
Msc	90.1589	0.446509	2.94382	0.00324185	0.0441025
Csrnp3	1264.59	-0.386464	-2.94059	0.00327591	0.0443808
Nfe2l3	43.5808	0.441804	2.93486	0.003337	0.0450709
Specc1	567.914	0.358832	2.9348	0.00333758	0.0450709
Fbxw7	1103.08	-0.372601	-2.93103	0.00337838	0.0453689
Sepn1	1626.14	0.328048	2.92785	0.00341311	0.045686
Jag1	157.999	0.35326	2.91674	0.00353705	0.0470474
Otud1	355.701	0.358973	2.91559	0.0035502	0.0470613
Ihh	31.7288	-0.444785	-2.91557	0.00355035	0.0470613
Ubox5	202.827	-0.322849	-2.91247	0.00358581	0.0473272
Islr	1538.86	0.377047	2.90734	0.00364521	0.0478236
Pcdh18	196.422	-0.434747	-2.90297	0.00369638	0.0482402
Dnm1	1437.72	0.405351	2.90039	0.00372702	0.0484449
Spry1	609.321	0.362831	2.90037	0.00372726	0.0484449
Adamts1	393.575	0.418199	2.89945	0.00373812	0.0485451
Sec61b	2896.64	-0.32889	-2.89769	0.00375921	0.0485971
Pianp	1874.75	-0.361844	-2.89653	0.00377318	0.0485971
Ipo4	3836.43	-0.327863	-2.89623	0.00377677	0.0485971
Pex11g	316.025	-0.347891	-2.88597	0.00390215	0.0498741
