# Supplementary material for: Sleep Deprivation Alters the Pituitary Stress Transcriptome in Male and Female Mice
Source: Front Endocrinol (Lausanne). 2019 Oct 9;10:676. doi: 10.3389/fendo.2019.00676 (PMC6794367; doi:10.3389/fendo.2019.00676)
Supplement: Supplementary Dataset 2 — Excel workbook contains results from performed differential expression analysis considering all mice (i.e., both males and females from all treatment groups) in a single model to identify consistent transcriptional changes resulting from restraint stress, PSD, and the combination of the two challenges. Adjusted p-values were ≤0.05 and if the absolute value of their log2 fold-changes following shrinkage (i.e., using the lfcShrink function in DESeq2) were ≥0.322. [file Data_Sheet_2.xlsx]

## Sheet: NoRestraint_PSD_vs_NoRest_NoPSD
Gene	baseMean	log2FoldChange	stat	pvalue	padj
Serpinb11	259.643	0.789504	7.09574	1.28665e-12	2.27931e-08
Nmb	373.963	0.819111	6.86225	6.77824e-12	6.00382e-08
Mthfd1l	261.371	0.552234	6.63137	3.32578e-11	1.96387e-07
Cdh13	1038.5	0.784058	6.52152	6.9597e-11	3.08228e-07
Serpina3n	136.099	0.604133	6.38208	1.74693e-10	6.18937e-07
Lcn2	1479.61	0.670074	6.30484	2.88487e-10	8.51759e-07
Clu	23430.1	0.582938	6.25346	4.01467e-10	1.016e-06
Gadd45b	969.767	0.671157	6.13528	8.50111e-10	1.88246e-06
Rab26	245.297	0.510141	6.08839	1.14054e-09	2.24496e-06
Ryr3	306.454	0.701897	6.05122	1.43751e-09	2.54655e-06
Vgf	720.94	0.687438	5.88965	3.87005e-09	6.23254e-06
Slc2a6	127.407	0.547818	5.81557	6.04264e-09	8.92045e-06
BC096411	3803.07	-0.33626	-5.60719	2.05638e-08	2.60205e-05
Arg1	215.894	0.667886	5.54166	2.99611e-08	3.5384e-05
Chga	56047.1	0.584825	5.52225	3.34692e-08	3.70567e-05
Lama4	366.352	0.381593	5.44705	5.12131e-08	5.33671e-05
Tspan4	374.61	0.413376	5.43494	5.48154e-08	5.39475e-05
Slc37a2	258.075	0.567517	5.35287	8.65715e-08	7.85355e-05
Gsn	3074.82	0.37673	5.34854	8.86655e-08	7.85355e-05
AK154635	168.294	0.581064	5.17542	2.27393e-07	0.000191822
Aplnr	262.226	-0.597171	-5.12714	2.94175e-07	0.000236878
Mt3	1049.75	0.459254	5.07594	3.85592e-07	0.00029699
Gm15663	111.376	0.465542	4.94598	7.57612e-07	0.000536844
Hist1h1c	766.725	0.469742	4.92081	8.6188e-07	0.000587238
Fut1	117.735	0.576985	4.89783	9.68986e-07	0.000635763
Galnt13	702.52	0.520575	4.85022	1.23328e-06	0.000753362
Slc6a9	201.016	0.573937	4.77594	1.7887e-06	0.00102495
Pla1a	45.314	0.498467	4.77539	1.79358e-06	0.00102495
Nkain1	609.512	0.343966	4.75539	1.98066e-06	0.00109648
Apod	4141	0.500799	4.72565	2.29384e-06	0.00116101
Gm9949_	56.3533	0.543039	4.70583	2.52832e-06	0.00124414
Aldh1l2	475.452	0.531244	4.6667	3.06076e-06	0.00144888
Slc35f3	194.805	0.34837	4.66355	3.10796e-06	0.00144888
Trpc7	125.165	0.554949	4.64615	3.38185e-06	0.00153614
P2ry1	93.4977	0.45021	4.63453	3.57745e-06	0.00158436
Vstm4	232.415	0.494362	4.6253	3.74063e-06	0.00161622
Klk1b26	451.818	0.52404	4.60849	4.05611e-06	0.00171081
Nell1	1172.55	0.548996	4.58925	4.44838e-06	0.00175292
Klk1b16	253.617	0.544546	4.58865	4.46113e-06	0.00175292
Nrip2	162.429	0.475991	4.58845	4.46552e-06	0.00175292
Slc7a3	120.44	0.518914	4.57195	4.8321e-06	0.00182129
Plk5	460.732	0.46227	4.54898	5.39063e-06	0.00194888
Dusp4	63.4293	0.538813	4.54131	5.59049e-06	0.00198071
Psat1	784.9	0.47311	4.48778	7.19704e-06	0.00247281
Arpp21	254.24	0.54027	4.48369	7.33648e-06	0.00247281
Cga	109187	-0.397889	-4.4819	7.39819e-06	0.00247281
Neu2	50.5174	0.538083	4.4761	7.60196e-06	0.00249387
AK046721	103.267	-0.49975	-4.4701	7.81833e-06	0.00251821
Slc9a9	543.039	0.395652	4.46535	7.99393e-06	0.00252879
Rnd1	193.359	0.458753	4.43427	9.23831e-06	0.00282167
Cntn4	102.17	0.490044	4.41054	1.03111e-05	0.00309596
Hs6st2	327.707	0.49328	4.38409	1.1647e-05	0.00334166
Ssr2	5743.11	-0.42227	-4.38319	1.16953e-05	0.00334166
Jam2	4006.61	0.472576	4.37862	1.19435e-05	0.00334305
Itm2b	41078.2	-0.340743	-4.37618	1.20776e-05	0.00334305
Tagln	357.065	0.423417	4.35771	1.3143e-05	0.00358196
Fam212b	1198.71	0.409854	4.30705	1.65447e-05	0.00439042
Ecel1	6155.14	-0.509578	-4.30296	1.68529e-05	0.00439042
Lbh	1404.36	0.361267	4.27306	1.92809e-05	0.00474391
Il20ra	58.2629	0.50791	4.2298	2.33895e-05	0.00550173
Etv4	77.4804	0.487135	4.22515	2.38779e-05	0.00550173
Trpv2	126.464	0.408257	4.22481	2.39138e-05	0.00550173
Sesn2	432.65	0.345455	4.20687	2.58928e-05	0.00588065
Cep72	111.559	0.441643	4.19876	2.68383e-05	0.00601823
Hbegf	99.2444	0.450223	4.18096	2.90283e-05	0.0063486
Rrm2	44.3001	0.500838	4.17432	2.98883e-05	0.00645697
Megf11	4108.5	0.489886	4.16535	3.10879e-05	0.00663521
Klhl36	315.97	0.337008	4.16252	3.14757e-05	0.00663799
Nelfcd	5700.02	0.445188	4.15607	3.23771e-05	0.00664088
Cav2	500.046	0.372624	4.14452	3.40531e-05	0.00664088
Cst6	235.312	0.489699	4.14404	3.41244e-05	0.00664088
Gm13889	191.16	0.481963	4.14337	3.42237e-05	0.00664088
Vstm2a	299.793	0.323245	4.13851	3.49564e-05	0.00664088
Gpr137c	94.0189	0.382637	4.13136	3.60621e-05	0.00664088
Pcdha12	213.333	0.390634	4.1252	3.70412e-05	0.00664088
Crisp1	207.532	0.477302	4.12293	3.74077e-05	0.00664088
Golga7b	365.867	0.41356	4.12267	3.74506e-05	0.00664088
Egr3	191.385	0.423876	4.12236	3.75019e-05	0.00664088
Il34	109.576	0.459087	4.12192	3.75726e-05	0.00664088
Uts2	21.7786	0.492079	4.1213	3.76745e-05	0.00664088
Col17a1	228.685	0.455344	4.11788	3.82371e-05	0.00664088
Cartpt	46.1741	0.471255	4.10796	3.99177e-05	0.00673481
Cys1	66.2886	0.394198	4.10795	3.99184e-05	0.00673481
Slc4a10	1173.85	0.480101	4.09632	4.19766e-05	0.00694968
Cspg5	344.789	0.483136	4.0518	5.08254e-05	0.00782932
Acta2	190.411	0.442921	4.04404	5.25385e-05	0.00799994
Ass1	496.64	-0.327337	-4.03315	5.50344e-05	0.00819273
Trpc3	175.63	0.441488	4.00782	6.12829e-05	0.00889858
Gch1	244.64	0.443606	3.99492	6.47156e-05	0.0092337
Kirrel3	372.547	0.433799	3.99276	6.53096e-05	0.0092337
Stc2	259.527	0.487119	3.99143	6.56758e-05	0.0092337
Grik1	436.362	0.468515	3.98395	6.77802e-05	0.00945453
Agbl2	130.539	0.342247	3.97507	7.0358e-05	0.00966195
Tgif1	304.072	-0.322935	-3.96735	7.26762e-05	0.00990353
Klhl23	526.345	0.323587	3.96453	7.35409e-05	0.00994487
Rpl27	1425.01	-0.346522	-3.96088	7.46729e-05	0.00994517
Cd93	238.573	-0.347091	-3.95974	7.50298e-05	0.00994517
Col9a3	150.794	0.441232	3.95578	7.62866e-05	0.00994517
Cd38	167.564	-0.354592	-3.95248	7.73465e-05	0.00994517
Ostc	4662.85	-0.357269	-3.94534	7.96853e-05	0.010083
Pcsk2	37178.1	0.475168	3.93841	8.20242e-05	0.0103054
Mab21l1	77.1737	0.476369	3.93573	8.29455e-05	0.0103477
Pomc	2.32931e+06	0.469702	3.91062	9.20588e-05	0.0107291
AK030561	674.027	-0.456892	-3.87899	0.000104893	0.0119114
Itprip	326.149	0.440752	3.87642	0.000106006	0.0119611
Col19a1	160.267	0.464239	3.87376	0.00010717	0.0120159
Cpne7	689.104	0.443926	3.87007	0.000108805	0.0121225
AK137436	348.387	-0.343963	-3.85276	0.000116792	0.0128801
Emp3	218.308	0.356248	3.84193	0.000122069	0.0132666
Islr	1533.11	0.366	3.81873	0.000134143	0.0141449
Rps26	3280.95	-0.322475	-3.80366	0.000142576	0.0147704
Slc1a1	137.062	0.46198	3.79891	0.000145331	0.0148818
Spry4	187.182	0.42185	3.77197	0.000161963	0.0163953
Scel	207.849	0.444838	3.76753	0.00016487	0.0165451
Phgdh	535.138	0.345127	3.76546	0.000166245	0.0165451
Tekt5	117.425	0.413485	3.75579	0.000172792	0.0168977
AK077353	1209.01	0.454781	3.75462	0.000173603	0.0168977
Metrn	499.159	0.421289	3.74753	0.000178587	0.0172878
Nrip3	971.475	0.41403	3.7443	0.000180897	0.0174162
Dgkb	352.695	0.392903	3.7304	0.000191175	0.0181476
Sh3d19	996.232	-0.388446	-3.72989	0.000191567	0.0181476
Tat	50.7912	0.439335	3.72229	0.00019742	0.0182342
C2cd4c	143.584	-0.44312	-3.68823	0.000225815	0.0203062
Chil1	104.033	0.437421	3.67594	0.000236971	0.0212017
AK035979	58.4735	0.432687	3.67308	0.000239647	0.0213029
Stra6	147.447	0.454774	3.66843	0.000244041	0.0213694
Golph3l	2305.44	-0.330834	-3.66357	0.000248724	0.0213694
Mmp23	165.776	0.368274	3.66257	0.000249701	0.0213694
Kcnj4	72.106	0.392795	3.64838	0.000263901	0.0217442
Nfkbia	1774.44	-0.360715	-3.645	0.000267389	0.0217605
Gucy1b3	753.798	0.337103	3.62091	0.000293572	0.0227101
Matn2	277.543	0.336211	3.61977	0.000294869	0.0227113
Ccdc162	285.342	0.404598	3.60943	0.000306876	0.0232321
Rhbg	33.4118	0.413002	3.59116	0.000329209	0.0246988
Slc24a3	721.523	0.371177	3.59019	0.000330433	0.0246988
Nkain4	38.4821	0.438044	3.58713	0.000334335	0.0247859
Samd4	150.622	0.381745	3.58067	0.000342714	0.0252847
Trib3	241.418	0.436268	3.57268	0.000353344	0.0256536
Rasgrp1	754.514	0.427749	3.55602	0.000376522	0.0265878
Eif4ebp1	262.668	0.40086	3.55375	0.000379786	0.026698
Chil6	129.381	-0.415213	-3.54284	0.000395842	0.0267647
Bdnf	504.204	0.40451	3.52766	0.000419252	0.0275076
2610016A17Rik	9.27197	0.391466	3.52452	0.000424254	0.0275299
Col24a1	623.966	-0.344745	-3.51966	0.000432106	0.0277113
Rnaset2b	6054.21	-0.394294	-3.51646	0.000437341	0.0278637
Il23a	54.1303	0.416259	3.51532	0.000439229	0.0278637
AK036329	50.9257	0.42161	3.51461	0.000440408	0.0278637
Lrrc46	87.5992	0.352085	3.51082	0.000446725	0.0278652
Tyro3	209.552	0.365176	3.49792	0.0004689	0.0289428
Neto1	101.157	0.359284	3.49575	0.00047273	0.0289772
Tmem200a	314.628	0.418796	3.48572	0.000490823	0.0294743
C77370	2595.12	-0.384675	-3.47945	0.000502448	0.0299692
Wdr72	297.028	0.37706	3.47791	0.000505339	0.0300406
AK028782	282.786	0.339549	3.46995	0.00052055	0.0305699
Slc39a5	61.4566	0.37994	3.46409	0.000532027	0.0309011
Igfbp2	423.827	0.392037	3.44698	0.000566888	0.0318971
Mfap4	274.349	-0.347622	-3.44684	0.00056718	0.0318971
Hdac9	558.738	0.352655	3.44058	0.000580473	0.0324134
Lgals1	1125.77	0.378603	3.43826	0.000585467	0.0324134
Nrep	2016.36	-0.324793	-3.43824	0.000585509	0.0324134
B3gnt9	1490.9	-0.354624	-3.43296	0.000597025	0.0327922
Dmrta1	195.855	-0.446029	-3.43235	0.000598365	0.0327922
Serpinb1a	93.3704	0.381097	3.41769	0.000631539	0.0339182
Il1rapl2	122.447	0.409453	3.41674	0.000633753	0.0339182
Ccdc155	207.39	0.406514	3.41199	0.000644898	0.0342599
Impg1	374.217	-0.359065	-3.41155	0.000645939	0.0342599
Kcnip2	404.961	0.374936	3.40832	0.000653638	0.0344619
Rbfox3	770.446	0.409163	3.39954	0.000674992	0.0353554
Cstad	52.2592	0.38859	3.3914	0.000695363	0.0357054
Gm10653	334.407	-0.35038	-3.38161	0.000720625	0.0364393
Slc13a4	96.9087	0.396565	3.38109	0.000721998	0.0364393
Chst11	2241.39	-0.403589	-3.37755	0.000731337	0.0366299
Unc5b	170.293	0.40649	3.37546	0.000736913	0.036773
Ano4	219.263	-0.38382	-3.36152	0.000775136	0.0381585
AY358078	47.8	-0.391186	-3.35495	0.000793793	0.0385607
Etv1	2283.35	0.375773	3.3547	0.000794505	0.0385607
Prkce	3070.26	-0.322101	-3.33416	0.000855577	0.040203
Gm4013	53.7795	0.340411	3.32515	0.000883695	0.0406615
Ccdc78	34.3087	0.374279	3.32246	0.000892274	0.0408502
Slitrk6	2724.98	0.375321	3.32203	0.000893661	0.0408502
Ptgds	3941.04	0.389438	3.3113	0.000928639	0.0420738
Csdc2	966.32	0.373273	3.29824	0.000972934	0.0436343
Pi16	151.657	0.325845	3.2855	0.001018	0.0445746
Cited4	175.615	-0.344401	-3.28458	0.00102134	0.0445746
Myadml2	115.785	0.348974	3.28451	0.00102158	0.0445746
Tmem163	329.232	0.371246	3.28129	0.00103333	0.0445977
Vcam1	142.137	0.349866	3.27581	0.00105358	0.044784
Mdh1b	58.7946	0.343316	3.25793	0.00112228	0.0460211
Fam178b	42.4623	0.392436	3.25155	0.00114779	0.0464488
Sema3e	757.023	0.372257	3.24686	0.00116685	0.0468724
Igsf10	284.485	-0.329229	-3.24358	0.00118038	0.0471202
Scn11a	171.152	-0.38944	-3.2368	0.00120878	0.0475857
Pcsk6	7728.3	-0.394799	-3.23529	0.00121519	0.0476534
Mir1943	16.7632	0.395076	3.23361	0.00122238	0.0478023
Clcf1	128.352	0.356887	3.23169	0.00123061	0.0480181
Vim	1384.55	0.322499	3.22761	0.00124828	0.0483693
Smco2	147.318	-0.401136	-3.2271	0.00125053	0.0483693
Nptx2	281.845	0.394734	3.22453	0.00126181	0.0484537
Myc	471.812	-0.414044	-3.21928	0.00128513	0.0488367
Cth	44.9685	0.373331	3.21355	0.00131106	0.0492062
Ngef	219.954	0.384471	3.20898	0.00133207	0.0498703

## Sheet: Restraint_NoPSD_vs_NoRest_NoPSD
Gene	baseMean	log2FoldChange	stat	pvalue	padj
Egr3	191.385	1.54674	13.0746	4.59867e-39	8.59169e-35
Il1b	69.0577	1.38097	11.4338	2.83468e-30	2.64801e-26
Gadd45b	969.767	1.17722	10.4176	2.06129e-25	1.2837e-21
Fosb	950.563	0.873319	10.3097	6.36993e-25	2.97523e-21
Fam212b	1198.71	0.984019	10.1767	2.52052e-24	9.41817e-21
B3galt2	445.613	1.08684	9.98235	1.82111e-23	5.67062e-20
Nr4a2	5422.77	0.822711	9.34447	9.23538e-21	2.46492e-17
Dusp14	2408.61	1.00829	9.20921	3.28532e-20	7.67246e-17
Nr4a1	13448.5	0.632028	8.77747	1.67196e-18	3.4708e-15
Slc25a25	2728.86	0.895665	8.75022	2.12933e-18	3.97823e-15
Gem	1019.8	0.849965	8.64097	5.5739e-18	9.46701e-15
Gm29766	283.591	0.622373	8.62661	6.31995e-18	9.83963e-15
Ptp4a1	2965.29	0.83609	8.39945	4.48567e-17	6.44659e-14
Egr4	70.3752	0.919544	8.04494	8.62875e-16	1.15151e-12
Mir335	55.6343	0.971179	8.02545	1.01154e-15	1.25991e-12
Dnajb1	1761.12	0.777938	8.00429	1.20157e-15	1.40306e-12
Mcl1	3097.18	0.383152	7.79152	6.62098e-15	7.27645e-12
Nr4a3	718.447	0.464412	7.71326	1.22646e-14	1.27299e-11
Atf3	281.809	0.680053	7.5331	4.9549e-14	4.87223e-11
Mest	20221.2	0.766921	7.52595	5.23388e-14	4.88923e-11
Dusp5	112.927	0.85068	7.46288	8.46492e-14	7.53096e-11
AK017280	1075.75	0.539932	7.31254	2.62137e-13	2.22614e-10
TRNA_Ser	17.5765	0.88114	7.18232	6.85403e-13	5.56755e-10
Grasp	140.692	0.721523	7.10946	1.16494e-12	9.0686e-10
C230071H18Rik	194.697	0.730759	7.03296	2.02203e-12	1.5111e-09
AK216824	691.124	0.778247	6.99939	2.57077e-12	1.8473e-09
Clk1	5037.98	0.415992	6.84292	7.7596e-12	5.14882e-09
AK205396	260.016	0.764036	6.83383	8.26765e-12	5.14882e-09
Nap1l5	7454.38	0.504189	6.69688	2.12916e-11	1.24309e-08
Midn	3539.68	0.751436	6.69128	2.21234e-11	1.25252e-08
B230216N24Rik	179.646	0.789353	6.68209	2.35566e-11	1.29443e-08
Zc3h12c	782.477	0.540565	6.60568	3.95704e-11	2.11227e-08
AK021342	70.9569	0.79081	6.55695	5.49179e-11	2.85009e-08
Trib1	714.805	0.63993	6.51441	7.29736e-11	3.68477e-08
Errfi1	1304.31	0.786866	6.48179	9.0639e-11	4.45634e-08
Nfkbiz	436.644	0.613566	6.46899	9.86631e-11	4.61515e-08
AK006051	292.246	0.496988	6.46876	9.88097e-11	4.61515e-08
Emd	2862.8	0.597529	6.41659	1.39361e-10	6.35042e-08
Mknk2	3134.99	0.409257	6.35826	2.04056e-10	9.07707e-08
Jrk	362.31	-0.348229	-6.31883	2.6355e-10	1.1451e-07
Dos	11182.1	0.640733	6.21354	5.18038e-10	2.19966e-07
Per1	4665.16	0.730474	6.18146	6.35096e-10	2.57933e-07
AK045867	85.5667	0.753567	6.17838	6.47627e-10	2.57933e-07
BC057675	548.514	0.718458	6.17475	6.62677e-10	2.57933e-07
Gpr3	46.5903	0.693345	6.12948	8.81695e-10	3.29454e-07
Rgs2	3025.3	0.656389	6.05223	1.42855e-09	5.23325e-07
Siah2	430.982	0.553715	6.03505	1.5891e-09	5.70944e-07
Fem1c	859.314	0.397771	6.02881	1.65172e-09	5.82248e-07
Sik1	1626.51	0.647284	5.99888	1.98677e-09	6.87387e-07
Mat2a	4714.4	0.492117	5.98711	2.13605e-09	7.25597e-07
Crem	2380	0.676547	5.89333	3.78485e-09	1.24057e-06
Fam46a	7085	0.644785	5.84997	4.91671e-09	1.55693e-06
Inpp5f	2572.39	0.474237	5.83045	5.52781e-09	1.72127e-06
Ddit4	1652.7	0.391869	5.80204	6.55126e-09	2.00651e-06
Tiparp	815.395	0.674757	5.778	7.55954e-09	2.27798e-06
Calca	30.4887	0.687834	5.76385	8.22162e-09	2.43817e-06
Fosl2	6336.9	0.523601	5.67806	1.36228e-08	3.9156e-06
Erf	1302.22	0.464137	5.64676	1.63503e-08	4.62836e-06
Pard6a	828.43	0.549342	5.64025	1.69801e-08	4.73492e-06
Fam13c	964.404	0.638975	5.6186	1.92507e-08	5.28166e-06
Arc	506.757	0.671046	5.61632	1.95062e-08	5.28166e-06
Gprc5a	117.674	0.657205	5.57167	2.52316e-08	6.73431e-06
Bcl2l11	795.083	0.431226	5.54405	2.95549e-08	7.7771e-06
AK039878	321.698	0.444789	5.52609	3.27447e-08	8.49679e-06
Parp16	312.31	-0.370568	-5.51975	3.39481e-08	8.68839e-06
Ccdc117	879.901	0.37383	5.48794	4.06652e-08	1.02669e-05
Tmem198	1147.54	0.532184	5.42287	5.86509e-08	1.46103e-05
AK082338	57.1098	-0.548536	-5.38736	7.15001e-08	1.75768e-05
AK040485	490.282	0.343708	5.3755	7.63692e-08	1.85299e-05
Cpeb4	2636.42	0.423238	5.36035	8.30594e-08	1.96281e-05
Coq10b	1790.77	0.640078	5.35675	8.47344e-08	1.96281e-05
Vps37b	881.899	0.590338	5.35401	8.60283e-08	1.96281e-05
Tob2	1104.08	0.408398	5.34169	9.20858e-08	2.07282e-05
Zdbf2	3145.46	0.609389	5.33271	9.67595e-08	2.15209e-05
Ccdc166	269.762	-0.368024	-5.27139	1.35392e-07	2.94132e-05
Tm6sf2	57.8966	0.573046	5.25082	1.51422e-07	3.25175e-05
Cwc25	1285.3	0.614741	5.23169	1.6797e-07	3.56611e-05
Prdm1	116.563	0.569621	5.16384	2.41933e-07	5.07868e-05
TRNA_Thr	22.5759	0.623428	5.14952	2.61156e-07	5.42131e-05
Maff	89.8175	0.610722	5.11005	3.22074e-07	6.54056e-05
Trmt61b	354.075	0.577799	5.09188	3.54529e-07	7.04645e-05
Syt4	10238.9	0.453985	5.08354	3.70468e-07	7.28573e-05
Josd1	1287.4	0.367795	5.08003	3.77368e-07	7.34413e-05
Dnd1	87.2113	0.469077	5.05684	4.26252e-07	8.05976e-05
Trp53inp2	3708.84	0.36867	5.05647	4.27081e-07	8.05976e-05
Zfp870	222.927	-0.409312	-5.04277	4.58833e-07	8.57237e-05
Fam110a	653.604	0.451467	5.0328	4.83375e-07	8.94147e-05
Nfil3	614.882	0.569044	5.00156	5.68697e-07	0.000102163
Dedd2	697.336	0.323353	4.99112	6.0029e-07	0.000106812
Irs2	1287.16	0.554075	4.95957	7.06499e-07	0.00012163
Nap1l3	766.256	0.408209	4.95871	7.09612e-07	0.00012163
Kif18a	288.19	0.593366	4.94002	7.81162e-07	0.000132677
Junb	3231.06	0.461847	4.93293	8.10069e-07	0.000136347
AK013890	46.5026	0.556309	4.91098	9.06215e-07	0.000150781
Tnfrsf25	98.5399	0.549586	4.90974	9.11963e-07	0.000150781
Amer3	271.11	-0.368662	-4.85782	1.18686e-06	0.000191156
Gper1	1112.3	0.387103	4.84659	1.25604e-06	0.000200569
Cpa4	179.966	0.557872	4.81671	1.45946e-06	0.000227225
Ifrd1	1915.53	0.49479	4.80184	1.57218e-06	0.000242752
Npas4	654.243	0.552615	4.79846	1.59893e-06	0.000244859
Csrnp1	684.733	0.566482	4.79182	1.65275e-06	0.000251043
AK138383	87.3548	-0.430126	-4.7843	1.71584e-06	0.000258525
Banp	920.84	-0.32749	-4.74464	2.08874e-06	0.000309714
Apold1	307.43	-0.379495	-4.73874	2.15049e-06	0.000316359
Egr1	3410.17	0.337993	4.69478	2.66894e-06	0.000380639
Klf4	147.837	0.571207	4.69124	2.71548e-06	0.000384343
Hspa1a	737.168	0.557059	4.68681	2.77496e-06	0.000387637
Gmpr2	1078.35	0.341125	4.67809	2.89553e-06	0.000400719
Pvr	828.124	0.545293	4.66384	3.10369e-06	0.000426369
Bag3	1257.97	0.516953	4.65658	3.21498e-06	0.000438434
5730405O15Rik	170.577	-0.324311	-4.6344	3.57982e-06	0.000481164
Pmvk	1080.72	0.380789	4.62173	3.80557e-06	0.000504251
AK154258	167.704	-0.507541	-4.59378	4.35282e-06	0.000568698
Zfp39	492.032	-0.368817	-4.59007	4.43091e-06	0.00057488
Arrdc3	1985.6	-0.34805	-4.55248	5.30176e-06	0.000674448
Amer2	586.011	0.43411	4.55229	5.30664e-06	0.000674448
Hspa1b	683.372	0.534506	4.54826	5.40923e-06	0.000682842
Cebpd	961.232	0.491198	4.50191	6.7345e-06	0.000833249
Nab2	1314.06	0.441743	4.46781	7.90239e-06	0.000961438
Phlda1	316.578	0.471083	4.44121	8.94559e-06	0.00107826
Spry4	187.182	0.510437	4.42645	9.57982e-06	0.00114
Taf13	249.151	0.354544	4.3786	1.19445e-05	0.00138608
Klf14	567.423	0.48624	4.37725	1.20187e-05	0.00138608
Pim3	1599.81	0.47766	4.3734	1.22325e-05	0.00139354
Cyp51	1178.68	0.386585	4.36572	1.26703e-05	0.00143466
Rpusd3	134.629	-0.34352	-4.31191	1.61848e-05	0.00179989
Gm6225	156.86	0.475414	4.30603	1.66208e-05	0.00183713
Thbs1	305.151	0.439694	4.28921	1.79312e-05	0.00195911
Efcab7	187.877	-0.331542	-4.26502	1.99884e-05	0.00215863
Dnase1l2	146.349	0.389372	4.2575	2.06726e-05	0.00221969
A830010M20Rik	1838.25	0.383961	4.23897	2.24549e-05	0.00238367
Fancf	133.739	-0.379153	-4.22461	2.3936e-05	0.00252653
Mir132	22.8695	0.371635	4.19876	2.68377e-05	0.0028169
Asphd2	1220.79	0.484452	4.17105	3.03206e-05	0.00314711
Usp27x	359.37	0.344812	4.16834	3.06828e-05	0.00316711
Zbtb21	877.703	0.372547	4.13193	3.5973e-05	0.00361335
Cidea	1039.79	0.462016	4.12074	3.77662e-05	0.00375312
Hes1	296.972	-0.364857	-4.11558	3.862e-05	0.00381766
Mthfr	2602.09	0.342381	4.10863	3.98017e-05	0.00389327
Pde4b	665.783	0.370187	4.10188	4.09814e-05	0.00398779
Odc1	8217.13	0.431528	4.0997	4.13687e-05	0.00400462
N4bp2l1	765.172	0.367308	4.07142	4.67284e-05	0.00438707
Cited2	1246.21	-0.481897	-4.04887	5.14654e-05	0.0047366
Esm1	2966.12	0.501855	4.04368	5.26188e-05	0.00479549
Rcor2	254.059	-0.350442	-4.01889	5.84731e-05	0.00527755
Skil	2466.25	0.364678	4.00765	6.13264e-05	0.00550847
A330009N23Rik	48.7832	0.432568	3.99999	6.3344e-05	0.00566247
Fndc4	909.389	0.405524	3.98466	6.75759e-05	0.00595688
Nedd9	271.502	0.357891	3.98416	6.77191e-05	0.00595688
Dpf1	400.543	-0.334903	-3.97962	6.90246e-05	0.00601688
Ccdc184	424.346	0.358166	3.97888	6.9241e-05	0.00601688
Srrd	383.795	0.43329	3.953	7.71761e-05	0.00652435
Serpine1	250.977	0.478312	3.93899	8.18262e-05	0.0068863
4931440P22Rik	51.8076	0.476636	3.91038	9.21493e-05	0.00759231
Nfe2l3	47.4412	0.424358	3.88684	0.00010156	0.00817862
Pdk4	227.995	0.441115	3.8438	0.000121142	0.00954974
Stac3	119.271	0.336478	3.82552	0.000130495	0.0100331
Mycn	320.66	-0.459267	-3.8084	0.00013987	0.0106227
TRNA_Leu	7.13771	0.449842	3.79851	0.000145571	0.0109225
Egr2	128.842	0.415937	3.79712	0.000146385	0.0109396
AK168779	29.8679	0.453868	3.7862	0.000152971	0.0112495
Sox4	1287.24	-0.385637	-3.78378	0.000154465	0.0112495
Btg2	5980.48	0.464576	3.78246	0.000155284	0.0112495
Snai1	45.0612	-0.429378	-3.78236	0.000155348	0.0112495
Arl5c	55.5082	0.433541	3.76498	0.000166565	0.0118758
Aoc2	118.851	0.356577	3.76311	0.00016781	0.0118758
Gm7008	41.853	0.457008	3.75496	0.000173371	0.0121314
Gpr34	56.4126	-0.397942	-3.74145	0.000182964	0.0126436
Amigo2	1209.73	0.35287	3.73575	0.000187155	0.0128552
Rnd1	193.359	0.399145	3.70969	0.00020751	0.0138957
AK045688	35.1608	-0.475384	-3.70619	0.000210398	0.0139449
Bhlha15	1846.8	0.377173	3.7011	0.000214665	0.0141717
Frat1	255.325	-0.374109	-3.6765	0.000236454	0.0154464
Gls2	375.124	0.402959	3.67069	0.000241896	0.0157041
AK170928	98.9164	0.411787	3.6705	0.00024208	0.0157041
Procr	37.368	0.442308	3.66949	0.000243035	0.0157115
Fam131a	2497.03	0.322215	3.66393	0.00024837	0.016001
Nespas	272.893	0.418169	3.66201	0.000250243	0.0160663
Sox18	97.518	-0.405719	-3.65902	0.000253186	0.0161443
Frs3os	34.6617	-0.413122	-3.65344	0.000258755	0.0164433
Cry2	2372.53	0.337771	3.64723	0.00026508	0.0167314
Trim16	426.889	-0.40542	-3.63405	0.000279004	0.0171468
AK079377	80.8608	0.340104	3.6314	0.000281888	0.0171985
1700102P08Rik	39.2498	0.429698	3.61995	0.000294662	0.0178161
AK085136	3088.18	0.374118	3.61507	0.000300269	0.0180966
Cbx4	1390.59	0.424895	3.60588	0.000311097	0.0186888
Nrep	2016.36	-0.350144	-3.60301	0.00031455	0.0187755
D030028A08Rik	356.766	0.412396	3.58934	0.000331518	0.0193554
Tinf2	985.944	0.390577	3.57073	0.000355985	0.0205909
Trim67	225.526	0.364516	3.54833	0.000387681	0.0217843
Plk3	219.954	0.423724	3.54716	0.000389415	0.0217843
Epor	65.356	-0.390566	-3.54153	0.000397819	0.0220775
C3ar1	102.437	-0.348811	-3.52936	0.000416563	0.022823
Cebpa	82.5845	0.428888	3.50119	0.000463185	0.0247146
Fam46c	674.976	0.34465	3.50054	0.000464317	0.0247146
4930563E22Rik	71.9485	0.332917	3.48913	0.000484598	0.025648
Gdnf	125.578	0.330371	3.48159	0.00049845	0.0263066
H2-Eb1	1266.82	0.383526	3.46875	0.000522881	0.0271163
Gpr61	198.782	-0.343154	-3.45973	0.000540719	0.0276018
Dnajb13	51.3173	0.4115	3.45269	0.000555031	0.0277978
Camk2n2	1010.97	0.34914	3.44269	0.000575954	0.0285426
Ackr3	251.099	0.343949	3.43922	0.000583403	0.0288352
Fgfbp3	275.16	0.384677	3.38941	0.000700443	0.0333846
Egfl8	64.8504	0.389637	3.38395	0.000714507	0.0337953
Cyr61	329.064	0.413648	3.38074	0.000722915	0.0341066
Chrna6	1320.56	-0.371517	-3.34765	0.000815008	0.0377293
Dusp4	63.4293	0.412441	3.33848	0.000842385	0.0386332
Mirlet7bhg	139.726	-0.339126	-3.32986	0.000868898	0.0395942
Col17a1	228.685	0.38095	3.32178	0.000894456	0.0402678
3110001I22Rik	66.6508	0.343911	3.30331	0.000955496	0.0424027
Tmlhe	190.574	0.328577	3.30061	0.000964759	0.0427123
Plbd1	68.3753	0.397271	3.25337	0.00114043	0.048382
Angptl4	76.7564	0.39045	3.25298	0.00114202	0.048382

## Sheet: Restraint_PSD_vs_NoRest_NoPSD
Gene	baseMean	log2FoldChange	stat	pvalue	padj
Fam212b	1198.71	1.37155	14.6887	7.61519e-49	1.42275e-44
Gadd45b	969.767	1.49504	13.5555	7.35007e-42	6.86606e-38
B3galt2	445.613	1.42138	13.3679	9.31702e-41	5.80233e-37
Egr3	191.385	1.50884	13.0959	3.47663e-39	1.62385e-35
Dusp14	2408.61	1.29746	12.1268	7.61851e-34	2.84673e-30
Fosb	950.563	1.02667	11.5525	7.16807e-31	2.23202e-27
Mest	20221.2	1.08664	11.0146	3.24805e-28	8.66904e-25
Gem	1019.8	1.1717	10.9652	5.61928e-28	1.31231e-24
Nr4a2	5422.77	1.03261	10.921	9.14961e-28	1.89936e-24
Il1b	69.0577	1.25784	10.5678	4.20291e-26	7.85229e-23
Slc25a25	2728.86	1.04778	10.5423	5.51253e-26	9.36278e-23
Nfkbiz	436.644	0.923571	10.0817	6.65691e-24	1.03643e-20
Zc3h12c	782.477	0.785756	9.97512	1.95855e-23	2.81474e-20
Nr4a1	13448.5	0.759583	9.85612	6.44914e-23	8.60638e-20
Gm29766	283.591	0.692892	9.75138	1.8198e-22	2.26662e-19
Fam13c	964.404	1.07832	9.64605	5.10848e-22	5.9651e-19
Nr4a3	718.447	0.712549	9.43219	4.01607e-21	4.16845e-18
Ptp4a1	2965.29	0.910138	9.41821	4.58838e-21	4.51183e-18
Atf3	281.809	0.916398	9.28719	1.58419e-20	1.47987e-17
Mir335	55.6343	1.09471	9.09783	9.21577e-20	8.19896e-17
Errfi1	1304.31	1.10393	9.07595	1.1269e-19	9.56992e-17
Erf	1302.22	0.709559	9.00564	2.14418e-19	1.74173e-16
Dusp5	112.927	1.00442	8.98554	2.57463e-19	2.00425e-16
Nap1l5	7454.38	0.647362	8.96291	3.16228e-19	2.36324e-16
AK017280	1075.75	0.635739	8.91846	4.72821e-19	3.39758e-16
Gprc5a	117.674	0.998537	8.69171	3.57029e-18	2.47051e-15
Dos	11182.1	0.862759	8.65412	4.96727e-18	3.31441e-15
Lcn2	1479.61	0.930543	8.62504	6.40687e-18	4.12757e-15
Midn	3539.68	0.936969	8.56831	1.05018e-17	6.54017e-15
Egr4	70.3752	0.968069	8.53542	1.39653e-17	8.41656e-15
Nfil3	614.882	0.939965	8.43421	3.3346e-17	1.88789e-14
Trib1	714.805	0.79974	8.41366	3.97422e-17	2.18383e-14
Zfp39	492.032	-0.656251	-8.38372	5.12812e-17	2.73739e-14
C230071H18Rik	194.697	0.847359	8.33957	7.4558e-17	3.86935e-14
Cpeb4	2636.42	0.626938	8.2824	1.20718e-16	6.09558e-14
Vgf	720.94	0.964788	8.1963	2.47899e-16	1.21882e-13
Crem	2380	0.91694	8.11871	4.71182e-16	2.25721e-13
Fam46a	7085	0.862312	8.1129	4.94241e-16	2.30848e-13
Inpp5f	2572.39	0.633764	8.09383	5.78165e-16	2.6346e-13
Sec14l1	2897.14	0.50179	8.08751	6.08984e-16	2.70896e-13
Lonrf1	665.811	0.695115	7.98068	1.45529e-15	6.32308e-13
Mcl1	3097.18	0.376804	7.94709	1.90945e-15	8.10779e-13
Parp16	312.31	-0.531528	-7.89984	2.7926e-15	1.13422e-12
Jrk	362.31	-0.439482	-7.84697	4.26217e-15	1.69426e-12
BC057675	548.514	0.893954	7.80154	6.11577e-15	2.33541e-12
TRNA_Ser	17.5765	0.961968	7.80134	6.1251e-15	2.33541e-12
Per1	4665.16	0.929056	7.7732	7.6529e-15	2.85958e-12
Grasp	140.692	0.773083	7.74618	9.46967e-15	3.46906e-12
AK021342	70.9569	0.928523	7.70404	1.31828e-14	4.73644e-12
Zdbf2	3145.46	0.862378	7.65836	1.88325e-14	6.58014e-12
AK216824	691.124	0.831813	7.64176	2.1427e-14	7.27856e-12
Bcor	1348.37	0.524468	7.63417	2.27287e-14	7.5212e-12
Emd	2862.8	0.688032	7.63294	2.29464e-14	7.5212e-12
Amigo2	1209.73	0.684152	7.60038	2.95254e-14	9.51075e-12
Oxsm	484.23	-0.409934	-7.59162	3.15941e-14	1.00046e-11
Npas4	654.243	0.904656	7.57906	3.48079e-14	1.0794e-11
AK006051	292.246	0.642738	7.57745	3.52424e-14	1.0794e-11
AK039878	321.698	0.723672	7.51079	5.87694e-14	1.7313e-11
Lysmd4	545.371	-0.352444	-7.5096	5.93068e-14	1.7313e-11
Kif18a	288.19	0.875566	7.50664	6.06622e-14	1.74362e-11
Pde4b	665.783	0.646636	7.4784	7.52304e-14	2.12959e-11
Ypel4	1183.36	0.478983	7.47294	7.84204e-14	2.18676e-11
Tmem198	1147.54	0.704856	7.44289	9.85081e-14	2.68048e-11
Pim2	1024.17	0.370055	7.44224	9.89956e-14	2.68048e-11
Pard6a	828.43	0.698668	7.40562	1.30539e-13	3.48407e-11
Syt4	10238.9	0.635467	7.38809	1.48953e-13	3.91955e-11
Fem1c	859.314	0.472356	7.38388	1.5374e-13	3.98933e-11
AK205396	260.016	0.806797	7.35093	1.96827e-13	5.03741e-11
Serpinb11	259.643	0.817499	7.28543	3.20647e-13	8.09547e-11
Tagln	357.065	0.702539	7.26717	3.67084e-13	9.14432e-11
Calca	30.4887	0.877617	7.22664	4.95079e-13	1.20124e-10
Rnd1	193.359	0.73779	7.15661	8.26948e-13	1.98075e-10
Engase	255.556	-0.507549	-7.14596	8.93658e-13	2.11345e-10
B230216N24Rik	179.646	0.832168	7.13485	9.68895e-13	2.26273e-10
Arc	506.757	0.850919	7.12594	1.03374e-12	2.38436e-10
Dnajb1	1761.12	0.664453	7.04743	1.82254e-12	4.15251e-10
Ccdc115	764.665	-0.352032	-7.03893	1.93728e-12	4.36074e-10
Bcl2l11	795.083	0.529336	7.03186	2.03803e-12	4.53293e-10
Gpr3	46.5903	0.804642	7.02194	2.18816e-12	4.80957e-10
Siah2	430.982	0.625158	7.01226	2.34505e-12	5.09448e-10
Fndc4	909.389	0.686099	6.99591	2.63551e-12	5.65968e-10
Mat2a	4714.4	0.553459	6.98315	2.88633e-12	6.12788e-10
Mknk2	3134.99	0.431168	6.9598	3.40766e-12	7.1534e-10
Fam110a	653.604	0.602499	6.9567	3.48336e-12	7.23107e-10
Trp53inp2	3708.84	0.484742	6.92971	4.21709e-12	8.65801e-10
Odc1	8217.13	0.69911	6.92015	4.51164e-12	9.16206e-10
Ttc30b	703.186	-0.393882	-6.8863	5.72609e-12	1.15033e-09
Rorc	2348.79	0.471644	6.84835	7.47071e-12	1.47501e-09
Klf4	147.837	0.825707	6.84779	7.50016e-12	1.47501e-09
Nab2	1314.06	0.650776	6.84143	7.84073e-12	1.51555e-09
Bag3	1257.97	0.735984	6.84092	7.86856e-12	1.51555e-09
Pars2	230.142	-0.483849	-6.83826	8.01628e-12	1.52825e-09
Sik1	1626.51	0.746453	6.83362	8.27967e-12	1.56252e-09
Cdh13	1038.5	0.821259	6.81336	9.53432e-12	1.7813e-09
Gper1	1112.3	0.523105	6.78823	1.1352e-11	2.09989e-09
Clk1	5037.98	0.395203	6.76438	1.33879e-11	2.45222e-09
Oxnad1	1023.29	0.400426	6.74738	1.50533e-11	2.7305e-09
Spry4	187.182	0.750655	6.73828	1.60273e-11	2.87561e-09
Gdnf	125.578	0.729212	6.73707	1.61612e-11	2.87561e-09
Clu	23430.1	0.626383	6.7218	1.79492e-11	3.16364e-09
Pvr	828.124	0.810412	6.70932	1.95539e-11	3.41425e-09
Cys1	66.2886	0.641159	6.69476	2.16026e-11	3.70276e-09
Irs2	1287.16	0.727271	6.68597	2.29397e-11	3.86861e-09
Hlf	1716.29	0.462112	6.68569	2.29843e-11	3.86861e-09
Ier3	140.937	0.774211	6.65916	2.75389e-11	4.59383e-09
Prdm1	116.563	0.720315	6.65685	2.79763e-11	4.6255e-09
Zrsr1	1774.22	0.370088	6.60827	3.88839e-11	6.37252e-09
AK045867	85.5667	0.797977	6.59939	4.12857e-11	6.70731e-09
TRNA_Thr	22.5759	0.807157	6.58688	4.4917e-11	7.23435e-09
Col17a1	228.685	0.732779	6.57782	4.77393e-11	7.62319e-09
Ttc30a1	561.999	-0.417177	-6.57151	4.98068e-11	7.88594e-09
Trim67	225.526	0.654076	6.56311	5.26957e-11	8.27322e-09
Fosl2	6336.9	0.629212	6.50579	7.72864e-11	1.18356e-08
Homer1	494.641	0.812253	6.50438	7.80142e-11	1.18499e-08
Nedd9	271.502	0.560931	6.44442	1.16045e-10	1.74844e-08
Fam65a	1451.05	0.440294	6.43175	1.2614e-10	1.86528e-08
Mir132	22.8695	0.65152	6.43105	1.26727e-10	1.86528e-08
Tat	50.7912	0.779705	6.43097	1.26795e-10	1.86528e-08
AK040485	490.282	0.401838	6.41805	1.38032e-10	2.01473e-08
Nmb	373.963	0.767586	6.41236	1.43287e-10	2.07522e-08
Tiparp	815.395	0.735362	6.39413	1.61467e-10	2.32053e-08
Srf	1265.44	0.410851	6.35691	2.05859e-10	2.93592e-08
Coq10b	1790.77	0.762242	6.32138	2.59236e-10	3.66917e-08
Ifrd1	1915.53	0.632914	6.31793	2.65095e-10	3.72389e-08
Serpine1	250.977	0.744375	6.29932	2.98959e-10	4.16825e-08
Klf14	567.423	0.680539	6.28884	3.19837e-10	4.42631e-08
Acta2	190.411	0.685568	6.2654	3.71876e-10	5.10864e-08
Amer2	586.011	0.576647	6.26238	3.79135e-10	5.17035e-08
Zfp612	3125.01	0.399157	6.2199	4.97464e-10	6.73487e-08
Traf4	472.71	0.478692	6.21876	5.01103e-10	6.73532e-08
Copg2	3404.54	0.331281	6.21038	5.2858e-10	7.0539e-08
Cwc25	1285.3	0.720379	6.20701	5.40014e-10	7.11096e-08
Tinf2	985.944	0.659924	6.20688	5.40468e-10	7.11096e-08
Dusp4	63.4293	0.738046	6.16193	7.18652e-10	9.38921e-08
Bdnf	504.204	0.70481	6.14128	8.18616e-10	1.04877e-07
Usp2	1955.65	0.501947	6.14109	8.19574e-10	1.04877e-07
Per2	1308.93	0.497183	6.13835	8.3383e-10	1.05976e-07
Csrnp1	684.733	0.7246	6.10393	1.03492e-09	1.30645e-07
AK013890	46.5026	0.723348	6.08541	1.16195e-09	1.45696e-07
Rgag4	5420.08	0.33427	6.0792	1.20783e-09	1.50439e-07
Noxred1	42.652	0.689795	6.07194	1.26374e-09	1.5636e-07
Phlda1	316.578	0.622038	6.04691	1.47649e-09	1.81482e-07
Sertad1	368.071	0.599694	6.04204	1.5218e-09	1.85751e-07
Cpa4	179.966	0.685011	6.04105	1.53111e-09	1.85751e-07
Il33	452.402	0.512677	6.00179	1.95152e-09	2.3372e-07
Tob2	1104.08	0.442887	5.99609	2.02128e-09	2.40532e-07
Gmpr2	1078.35	0.422296	5.98927	2.10786e-09	2.48622e-07
Ryr3	306.454	0.695004	5.98342	2.18504e-09	2.55145e-07
Pcsk1	5759.51	0.490086	5.96996	2.37307e-09	2.73679e-07
Rpa2	515.078	-0.328618	-5.96417	2.45879e-09	2.81825e-07
Maff	89.8175	0.726009	5.96164	2.49722e-09	2.84485e-07
Mthfd1l	261.371	0.500526	5.94862	2.70409e-09	3.06185e-07
Nespas	272.893	0.654198	5.92024	3.21469e-09	3.59641e-07
Cebpd	961.232	0.627152	5.90286	3.57256e-09	3.94948e-07
Rgs2	3025.3	0.621765	5.88611	3.95391e-09	4.31993e-07
Rap2a	1045.31	0.426193	5.87263	4.28929e-09	4.65911e-07
Vps37b	881.899	0.630016	5.86934	4.37544e-09	4.72522e-07
Gm12750	1419.19	-0.360296	-5.85866	4.66607e-09	5.01012e-07
Srrd	383.795	0.626298	5.83419	5.40521e-09	5.7706e-07
Chga	56047.1	0.618171	5.81997	5.88588e-09	6.24806e-07
Arhgap23	1000.23	0.430799	5.80134	6.57853e-09	6.94388e-07
Hey1	787.778	0.422329	5.76035	8.39419e-09	8.76138e-07
Syt13	3289.92	0.460718	5.75777	8.52328e-09	8.84669e-07
Pmepa1	979.961	0.471835	5.74685	9.0921e-09	9.38496e-07
Commd5	594.697	-0.372567	-5.74543	9.16893e-09	9.41226e-07
Gls2	375.124	0.620104	5.73811	9.57413e-09	9.72138e-07
Zbtb21	877.703	0.499716	5.73229	9.90826e-09	1.00063e-06
Entpd6	901.616	0.324994	5.72997	1.0045e-08	1.00898e-06
Cry2	2372.53	0.509684	5.71107	1.12267e-08	1.12165e-06
Hbegf	99.2444	0.61487	5.70697	1.15003e-08	1.14288e-06
Lox	709.49	0.647219	5.69757	1.21526e-08	1.20131e-06
Fam107b	344.34	0.653259	5.69622	1.22491e-08	1.20448e-06
Ipmk	563.175	0.364085	5.69408	1.2404e-08	1.21332e-06
4931440P22Rik	51.8076	0.691917	5.67947	1.35114e-08	1.30794e-06
Nrep	2016.36	-0.528895	-5.65965	1.51686e-08	1.44589e-06
Skil	2466.25	0.497633	5.65467	1.56149e-08	1.48088e-06
Tceanc	257.79	-0.373649	-5.64639	1.63847e-08	1.54026e-06
Cln8	648.337	0.323423	5.64439	1.65773e-08	1.54856e-06
Nupl2	297.488	-0.343671	-5.62457	1.85974e-08	1.7277e-06
Kctd7	400.089	-0.370592	-5.62208	1.88674e-08	1.73645e-06
Mthfr	2602.09	0.451297	5.61706	1.9423e-08	1.77882e-06
Tspan4	374.61	0.430401	5.61036	2.0191e-08	1.8312e-06
Ehhadh	344.213	-0.424648	-5.60853	2.04051e-08	1.84168e-06
Junb	3231.06	0.531527	5.55799	2.72893e-08	2.43945e-06
Mycn	320.66	-0.640331	-5.55034	2.85114e-08	2.53656e-06
Rbms2	1030.29	0.35155	5.54896	2.87376e-08	2.54458e-06
Prox1	689.951	0.50595	5.51054	3.57727e-08	3.09418e-06
Slc7a3	120.44	0.64312	5.4945	3.91814e-08	3.35792e-06
Josd1	1287.4	0.383896	5.49002	4.01883e-08	3.41934e-06
Slc16a3	131.723	0.593688	5.48969	4.02641e-08	3.41934e-06
AK008482	54.3346	0.628392	5.48762	4.07386e-08	3.44398e-06
Ccdc184	424.346	0.477978	5.48364	4.16667e-08	3.50658e-06
Zfp65	398.435	-0.345281	-5.44756	5.10665e-08	4.24034e-06
AK085136	3088.18	0.542307	5.44141	5.28618e-08	4.36999e-06
N4bp2l1	765.172	0.475003	5.43914	5.35385e-08	4.40643e-06
Prrt3	746.427	-0.324737	-5.43666	5.42898e-08	4.44867e-06
Rbm12b1	1035.81	0.322909	5.42394	5.82982e-08	4.74438e-06
Itprip	326.149	0.617153	5.42361	5.84065e-08	4.74438e-06
A430033K04Rik	658.791	-0.343725	-5.41347	6.18156e-08	4.99957e-06
Slc3a2	3526.4	0.403236	5.40748	6.39177e-08	5.1473e-06
Thbs1	305.151	0.541706	5.39513	6.84753e-08	5.49066e-06
Gm6225	156.86	0.581868	5.38438	7.2693e-08	5.80394e-06
Asphd2	1220.79	0.604916	5.37275	7.75431e-08	6.16484e-06
Aldh1l2	475.452	0.613608	5.36924	7.90684e-08	6.25947e-06
Cyp51	1178.68	0.459554	5.36426	8.12802e-08	6.39718e-06
Gm13889	191.16	0.629434	5.36379	8.14928e-08	6.39718e-06
Mgp	3001.43	0.419233	5.36004	8.32015e-08	6.47729e-06
Sft2d2	3320.78	0.477375	5.36003	8.32067e-08	6.47729e-06
Trim16	426.889	-0.580275	-5.33267	9.67815e-08	7.44102e-06
AK170928	98.9164	0.584493	5.32988	9.82756e-08	7.52493e-06
Gla	532.462	0.355762	5.31956	1.04017e-07	7.89978e-06
Galnt13	702.52	0.569376	5.29896	1.16465e-07	8.77386e-06
Axin2	850.123	-0.431417	-5.2953	1.18823e-07	8.91551e-06
Zfp759	234.657	-0.379442	-5.29227	1.20807e-07	9.01927e-06
Gstt1	970.783	0.367574	5.29172	1.21171e-07	9.01927e-06
Aplnr	262.226	-0.616166	-5.28364	1.26642e-07	9.3891e-06
Atl2	1746.56	0.324974	5.28233	1.27552e-07	9.41915e-06
Avpi1	363.148	0.473361	5.28063	1.28738e-07	9.46934e-06
Arg1	215.894	0.63249	5.27782	1.30733e-07	9.57836e-06
Rab6a	2910.68	0.366518	5.26883	1.37293e-07	1.00197e-05
Fam131a	2497.03	0.442534	5.24736	1.5429e-07	1.11729e-05
Kctd11	919.003	-0.33601	-5.23876	1.61658e-07	1.15865e-05
Etv4	77.4804	0.608026	5.23869	1.61724e-07	1.15865e-05
Elmsan1	768.584	0.35278	5.23853	1.61862e-07	1.15865e-05
Shisa2	266.43	0.582144	5.23506	1.64929e-07	1.17609e-05
Cbr2	543.595	0.492672	5.2229	1.76141e-07	1.24653e-05
Nap1l3	766.256	0.417081	5.22098	1.77974e-07	1.25475e-05
Frat1	255.325	-0.516791	-5.21576	1.83062e-07	1.28577e-05
Camk2n2	1010.97	0.508429	5.2138	1.85011e-07	1.29459e-05
Rcc2	2886.54	0.392813	5.21156	1.8726e-07	1.30544e-05
Zfp937	444.518	-0.389813	-5.20006	1.99228e-07	1.3735e-05
Ankrd9	107.836	0.509609	5.1954	2.04281e-07	1.40315e-05
Pstk	294.022	-0.360753	-5.18078	2.20965e-07	1.51219e-05
Arrdc3	1985.6	-0.381631	-5.17973	2.22206e-07	1.51514e-05
Fbxo33	1092.31	0.385309	5.17609	2.26589e-07	1.53941e-05
BC049150	231.801	-0.368544	-5.17422	2.2887e-07	1.54926e-05
Nlrx1	240.407	-0.381971	-5.15072	2.5949e-07	1.7476e-05
AK154635	168.294	0.578852	5.1398	2.75024e-07	1.82857e-05
Narf	960.195	-0.381189	-5.12881	2.91578e-07	1.92493e-05
Ung	515.296	-0.390313	-5.11146	3.19674e-07	2.10298e-05
Atp5d	4231.87	0.324204	5.10999	3.22168e-07	2.11195e-05
Nrip2	162.429	0.530181	5.09513	3.48504e-07	2.2608e-05
Serpina3n	136.099	0.438525	5.09172	3.54822e-07	2.29382e-05
Tnfrsf25	98.5399	0.564749	5.08423	3.69126e-07	2.36989e-05
Amer3	271.11	-0.383823	-5.08302	3.71488e-07	2.37689e-05
Procr	37.368	0.600845	5.0523	4.36521e-07	2.74968e-05
Itgav	947.97	0.33103	5.04946	4.43054e-07	2.76842e-05
Nfe2l3	47.4412	0.545635	5.03383	4.80769e-07	2.98412e-05
Taf13	249.151	0.397799	5.00196	5.67506e-07	3.49924e-05
Nrde2	508.626	-0.34849	-5.00067	5.71303e-07	3.49956e-05
Map3k14	286.589	0.389311	4.98597	6.16525e-07	3.72768e-05
Nkain1	609.512	0.361617	4.97261	6.6056e-07	3.96824e-05
AK154258	167.704	-0.541544	-4.97198	6.62726e-07	3.9685e-05
Lrrc7	194.084	0.465546	4.96545	6.85433e-07	4.07832e-05
Tpm4	3343.62	0.438472	4.94724	7.52734e-07	4.43638e-05
Dok3	176.54	0.376088	4.94279	7.70123e-07	4.5246e-05
2210404O09Rik	130.164	-0.398863	-4.93819	7.88514e-07	4.61812e-05
Zdhhc12	470.924	-0.352137	-4.93158	8.15687e-07	4.76234e-05
Uck2	826.734	0.538557	4.9256	8.41002e-07	4.89484e-05
Trmt61b	354.075	0.552603	4.92333	8.50854e-07	4.92152e-05
AK082338	57.1098	-0.50679	-4.90772	9.21394e-07	5.30745e-05
Cpe	30108.8	0.324612	4.90733	9.23257e-07	5.30745e-05
Uts2	21.7786	0.584418	4.90565	9.31172e-07	5.33653e-05
Adamts1	414.053	0.537629	4.90201	9.48612e-07	5.40333e-05
Ttll13	116.275	0.467467	4.89618	9.77169e-07	5.54695e-05
Prrx1	706.272	0.473041	4.89566	9.79764e-07	5.54695e-05
Ubc	48327.3	-0.367044	-4.89234	9.9642e-07	5.6242e-05
Tmc7	118.807	0.496415	4.88807	1.01832e-06	5.72052e-05
Nell1	1172.55	0.586354	4.88782	1.01961e-06	5.72052e-05
Hs6st2	327.707	0.549799	4.88178	1.05132e-06	5.86533e-05
Mir212	29.0971	0.449362	4.88171	1.0517e-06	5.86533e-05
Fam222a	1201.37	0.439715	4.87885	1.06708e-06	5.93342e-05
Hdac5	4149.62	0.394207	4.8664	1.13649e-06	6.28199e-05
Tm6sf2	57.8966	0.52922	4.85839	1.18346e-06	6.48403e-05
AK086087	126.453	0.41947	4.8467	1.25532e-06	6.81778e-05
Klk1b26	451.818	0.558218	4.84437	1.27015e-06	6.87833e-05
Arid4a	1193.54	-0.338882	-4.83324	1.3433e-06	7.25343e-05
AI854703	156.474	0.459732	4.82177	1.42292e-06	7.62999e-05
Pmvk	1080.72	0.386955	4.82153	1.42464e-06	7.62999e-05
Klk1b16	253.617	0.575396	4.81219	1.49283e-06	7.92346e-05
Tbc1d7	387.042	-0.347409	-4.792	1.65127e-06	8.66593e-05
Usp27x	359.37	0.38728	4.79044	1.66412e-06	8.68457e-05
Txnl4b	336.269	-0.326081	-4.78862	1.67929e-06	8.73933e-05
Acd	1449.99	0.370494	4.78414	1.71722e-06	8.89577e-05
Tgif1	304.072	0.390675	4.78339	1.72364e-06	8.89577e-05
Zfp128	193.017	-0.408841	-4.78149	1.74001e-06	8.95553e-05
Jade1	1581.92	0.428541	4.77452	1.80133e-06	9.24566e-05
Zfp354c	1230.96	-0.363996	-4.76593	1.87983e-06	9.5697e-05
Map3k19	219.097	0.56685	4.76245	1.9126e-06	9.68375e-05
Golph3l	2305.44	-0.42848	-4.75996	1.93628e-06	9.75083e-05
Egr2	128.842	0.535729	4.75468	1.98757e-06	9.95543e-05
Ccrn4l	984.996	0.483809	4.74595	2.07531e-06	0.000102846
Ell2	1618.19	0.454948	4.74441	2.09118e-06	0.000103003
Lrrc26	56.595	0.509613	4.74409	2.09445e-06	0.000103003
Jam2	4006.61	0.511191	4.74338	2.10181e-06	0.000103066
Cyb5r1	1013.51	0.325444	4.74095	2.12714e-06	0.000103763
Plk3	219.954	0.57086	4.73069	2.23756e-06	0.000108583
Egr1	3410.17	0.342017	4.72311	2.3226e-06	0.000112417
Plk5	460.732	0.479842	4.71137	2.46058e-06	0.000118305
Peo1	762.671	-0.456539	-4.71068	2.46895e-06	0.000118305
Pde4a	1226.51	0.345656	4.7101	2.47589e-06	0.000118305
Crisp1	207.532	0.548143	4.69324	2.68912e-06	0.000127023
Apold1	307.43	-0.371834	-4.69166	2.71001e-06	0.000127534
Slc9a9	543.039	0.41479	4.66476	3.08972e-06	0.000144313
Zfp85	141.678	-0.374494	-4.65536	3.23413e-06	0.000150307
Jmy	1183.69	0.322715	4.64399	3.41742e-06	0.000157648
Dnase1l2	146.349	0.419781	4.64175	3.45476e-06	0.00015872
Cnnm4	286.274	0.336071	4.63441	3.57952e-06	0.000163113
Krt18	2593.13	0.334847	4.62503	3.7455e-06	0.000168214
Gsn	3074.82	0.326377	4.62008	3.83593e-06	0.000171451
D030028A08Rik	356.766	0.524389	4.61717	3.89002e-06	0.000173454
Gsta3	175.948	0.41347	4.59861	4.2531e-06	0.000188296
Ky	635.779	-0.380948	-4.59568	4.31343e-06	0.000189424
Arl5c	55.5082	0.519408	4.5954	4.31914e-06	0.000189424
Efcab7	187.877	-0.356508	-4.58945	4.4442e-06	0.000194293
Nr1d1	710.814	-0.397546	-4.58772	4.48104e-06	0.00019515
Arid5b	1134.93	0.398524	4.57982	4.65369e-06	0.000201348
Tmem86b	176.96	0.369321	4.57277	4.81327e-06	0.000207203
AI839979	32.0668	0.540646	4.57158	4.84071e-06	0.000207906
Lama4	366.352	0.324836	4.5685	4.91226e-06	0.000210495
Zfp786	143.341	-0.391859	-4.56589	4.97371e-06	0.00021264
Mum1l1	979.092	-0.36117	-4.56493	4.99653e-06	0.000213128
Sepn1	1637.71	0.390744	4.5592	5.13487e-06	0.000218335
Trpc7	125.165	0.539987	4.52283	6.10186e-06	0.000254466
B3gnt9	1490.9	-0.462729	-4.5097	6.49179e-06	0.000268927
AK045688	35.1608	-0.557088	-4.49197	7.05667e-06	0.000291037
2810021J22Rik	473.399	-0.343649	-4.48945	7.14058e-06	0.000293203
Gpr52	189.321	-0.50503	-4.48637	7.24472e-06	0.000296643
Neu2	50.5174	0.539787	4.48427	7.31624e-06	0.000297151
Cd68	231.359	0.351375	4.48159	7.40888e-06	0.000299611
Phf13	543.018	0.366999	4.46957	7.83781e-06	0.000313563
Zfp143	371.923	-0.351537	-4.45705	8.30949e-06	0.00032961
Cartpt	46.1741	0.515201	4.45436	8.41432e-06	0.000333061
Zfp81	146.599	-0.384087	-4.44667	8.72116e-06	0.000342305
Spry1	625.495	0.420377	4.44324	8.86135e-06	0.000347079
Cst6	235.312	0.528218	4.43915	9.03166e-06	0.000352272
Rgs16	1147.62	-0.339773	-4.42432	9.67461e-06	0.000375105
Arl5b	336.819	0.393088	4.42175	9.79068e-06	0.000378118
Zfp960	342.871	-0.381953	-4.40004	1.08233e-05	0.000408508
Gm7694	471.404	0.37194	4.38935	1.13689e-05	0.00042566
Map3k9	398.436	0.360958	4.38557	1.1568e-05	0.000430529
Rcor2	254.059	-0.376014	-4.37512	1.21364e-05	0.00044811
Jag1	164.435	0.34841	4.37371	1.22153e-05	0.000449288
Pop1	223.285	-0.33491	-4.37369	1.22164e-05	0.000449288
Scg2	94552.1	0.401391	4.37044	1.23994e-05	0.000453342
Pcdh1	363.634	0.323329	4.36064	1.29682e-05	0.000470455
Cerk	1024.58	0.375982	4.35849	1.30962e-05	0.000473263
Tet1	756.914	-0.378907	-4.35642	1.32204e-05	0.000476828
Scn9a	120.165	0.451836	4.34967	1.36341e-05	0.00048798
Ankrd37	261.346	-0.438372	-4.33107	1.48386e-05	0.000522091
Gpr137c	94.0189	0.407134	4.32857	1.50082e-05	0.000527065
Gm5069	165.908	0.427556	4.32027	1.55841e-05	0.000543206
Gm15408	179.936	-0.408427	-4.31957	1.56334e-05	0.000543909
P2ry1	93.4977	0.427349	4.31047	1.62908e-05	0.000564678
AK172696	67.8922	-0.458233	-4.29653	1.73494e-05	0.000598043
Col24a1	623.966	-0.421633	-4.288	1.80293e-05	0.000618057
Slitrk6	2724.98	0.483115	4.28232	1.84955e-05	0.000629826
Efemp2	843.702	0.330916	4.28218	1.85074e-05	0.000629826
Gm5860	22.2996	0.522024	4.28166	1.85507e-05	0.00063015
Il1rapl2	122.447	0.511377	4.27502	1.9112e-05	0.000645696
Cebpb	261.903	0.506052	4.271	1.94597e-05	0.000653896
Mirlet7bhg	139.726	-0.427829	-4.2686	1.96707e-05	0.000657437
Peg10	1901.99	0.440754	4.26388	2.00904e-05	0.000667881
Enho	638.373	0.427944	4.26264	2.02023e-05	0.000670408
AK140702	80.5614	-0.385823	-4.2609	2.03602e-05	0.00067445
Rasgrp1	754.514	0.516516	4.25619	2.07943e-05	0.000686395
Gpr61	198.782	-0.414677	-4.25265	2.11251e-05	0.000694861
Unc5b	170.293	0.514806	4.24955	2.14199e-05	0.000702084
AK040719	114.906	0.342143	4.24153	2.22002e-05	0.000726384
Ccl7	16.537	0.487212	4.2377	2.25817e-05	0.000735008
A330009N23Rik	48.7832	0.457351	4.23545	2.28091e-05	0.000738549
Grik1	436.362	0.498063	4.23286	2.30743e-05	0.000744799
Pold2	1160.19	-0.378253	-4.23278	2.30819e-05	0.000744799
Gale	1362.03	-0.42021	-4.23155	2.32089e-05	0.000747605
Zfp300	129.384	-0.378794	-4.23022	2.33464e-05	0.000750675
Ctgf	628.361	0.476767	4.22215	2.41984e-05	0.00077414
Cited2	1246.21	-0.492855	-4.2155	2.49226e-05	0.0007892
Tex30	204.417	0.346354	4.20836	2.57231e-05	0.000812012
Fzd1	548.928	0.347089	4.2083	2.57299e-05	0.000812012
Zfp97	354.903	-0.352851	-4.20457	2.61582e-05	0.000821367
A830010M20Rik	1838.25	0.369389	4.19864	2.68522e-05	0.000837528
Fancf	133.739	-0.378049	-4.19191	2.76614e-05	0.000855117
C77370	2595.12	-0.457911	-4.18454	2.85748e-05	0.000878737
AK044689	91.3354	0.398465	4.17942	2.9225e-05	0.000893635
AK156477	258.38	0.325534	4.17726	2.95046e-05	0.00089924
Galr3	95.1083	-0.514061	-4.17591	2.968e-05	0.000902418
Tfap4	185.773	-0.477564	-4.16546	3.1072e-05	0.000930317
1700102P08Rik	39.2498	0.491711	4.16357	3.13316e-05	0.000932608
Gpam	1083.26	-0.351469	-4.16348	3.1344e-05	0.000932608
Pbld2	106.02	0.380545	4.16224	3.15139e-05	0.000936047
Clcf1	128.352	0.460067	4.15937	3.19127e-05	0.000944889
Gm7008	41.853	0.502547	4.15645	3.23238e-05	0.00095294
2810454H06Rik	132.798	-0.355085	-4.14763	3.35934e-05	0.000985284
Cd302	207.055	0.335097	4.14255	3.43473e-05	0.00100267
Gch1	244.64	0.459665	4.14016	3.47069e-05	0.00101001
Igfbp4	1492.88	0.463384	4.13943	3.48177e-05	0.00101166
Cbx4	1390.59	0.474284	4.1322	3.59312e-05	0.00104078
AK168779	29.8679	0.492076	4.12685	3.67772e-05	0.00106112
Zfp273	160.7	-0.352636	-4.1248	3.71053e-05	0.00106652
Lbh	1404.36	0.348108	4.10824	3.98691e-05	0.00113548
Kpna1	1088.56	0.356603	4.10078	4.11765e-05	0.00116738
Megf11	4108.5	0.479258	4.09999	4.13168e-05	0.00116958
Clic3	117.315	0.346604	4.09746	4.17701e-05	0.00117715
Cyr61	329.064	0.495715	4.09745	4.17733e-05	0.00117715
DQ548390	93.3499	0.415822	4.09467	4.22776e-05	0.00118957
Klf13	1484.9	0.346733	4.09133	4.28907e-05	0.001205
Col19a1	160.267	0.490949	4.08968	4.31971e-05	0.00120997
Pex11g	356.149	-0.345993	-4.08408	4.42525e-05	0.0012343
Gm15663	111.376	0.390904	4.08277	4.45028e-05	0.00123727
Fbxw7	1030.43	-0.347446	-4.0595	4.91786e-05	0.00134181
Scel	207.849	0.480204	4.0555	5.00262e-05	0.00136047
Aoc2	118.851	0.381028	4.05482	5.01738e-05	0.0013625
Zfp551	187.121	-0.333477	-4.03715	5.41035e-05	0.00145024
Esm1	2966.12	0.486346	4.03627	5.43076e-05	0.00145362
1700052K11Rik	198.756	-0.379161	-4.03525	5.4545e-05	0.00145789
AB353040	92.2659	0.490319	4.03468	5.4676e-05	0.0014593
Mt3	1049.75	0.366479	4.0342	5.47891e-05	0.00146024
Pcsk2	37178.1	0.483946	4.01192	6.02259e-05	0.00158034
Itga2b	268.791	0.349271	3.99931	6.35262e-05	0.00165507
Rab26	245.297	0.340953	3.98598	6.72011e-05	0.00172776
Fam178b	42.4623	0.483017	3.98588	6.72313e-05	0.00172776
Eif4ebp1	262.668	0.449056	3.98522	6.74177e-05	0.00173017
Notch3	619.359	0.34356	3.98407	6.77447e-05	0.0017338
Dmrta1	195.855	-0.504245	-3.98058	6.8746e-05	0.00175223
Cd14	96.7166	0.378454	3.97726	6.97148e-05	0.00177208
AK079811	82.2133	0.441597	3.9763	6.99971e-05	0.00177684
Lrrc3b	217.415	-0.322369	-3.97332	7.08767e-05	0.00179673
Tgfbi	661.998	0.410597	3.97249	7.11257e-05	0.00179869
Vav3	319.114	0.328859	3.97242	7.11464e-05	0.00179869
Gpr85	1136.81	-0.351068	-3.97127	7.149e-05	0.00180493
Slc5a3	733.342	0.351296	3.97036	7.1765e-05	0.00180943
AK079377	80.8608	0.371788	3.96788	7.25137e-05	0.00182338
Perm1	415.377	0.347478	3.96484	7.34449e-05	0.00184431
Ppp1r15a	1723.98	0.386298	3.96003	7.49403e-05	0.00186433
Polm	821.972	-0.377286	-3.95791	7.56098e-05	0.00187848
Aloxe3	558.414	0.475509	3.93709	8.2474e-05	0.00202479
Ttn	994.456	0.47302	3.9356	8.29906e-05	0.00203299
Rrm2	44.3001	0.474198	3.93549	8.30259e-05	0.00203299
Enc1	5575.01	0.47713	3.93255	8.40498e-05	0.00204733
AK216726	69.0874	-0.460668	-3.92013	8.85003e-05	0.00212526
Pi16	151.657	0.390375	3.91663	8.97963e-05	0.00215085
Espn	321.94	0.464661	3.91272	9.12637e-05	0.00217485
Palld	270.303	0.366034	3.89608	9.77632e-05	0.00230329
Gdpgp1	187.374	-0.328022	-3.88399	0.000102756	0.00240274
AK083547	629.547	0.35182	3.8815	0.000103814	0.00242446
Sntb2	253.179	0.387949	3.87565	0.000106342	0.00247992
S100a6	312.143	0.429167	3.87342	0.000107318	0.0024938
4930417O13Rik	73.4254	0.461001	3.86269	0.000112144	0.00258665
Chrna6	1320.56	-0.421863	-3.86019	0.000113299	0.00260045
Dusp6	496.298	0.322308	3.85553	0.000115479	0.00263753
Tacstd2	112.079	0.414038	3.849	0.000118599	0.00269233
Elovl4	291.859	0.376918	3.83474	0.000125698	0.00282601
Anxa1	162.125	0.404605	3.83406	0.000126046	0.00283043
Slc2a6	127.407	0.367284	3.81329	0.000137127	0.00304269
Stac3	119.271	0.333366	3.80069	0.000144293	0.00317905
Slc6a9	201.016	0.453638	3.79905	0.00014525	0.00319183
Cdh8	153.256	0.363446	3.79857	0.000145535	0.00319183
Islr	1533.11	0.3644	3.79853	0.000145557	0.00319183
Ccdc162	285.342	0.426839	3.79296	0.000148863	0.00324907
Nelfcd	5700.02	0.406731	3.79173	0.000149603	0.00326106
Neil1	605.661	0.326577	3.78653	0.000152765	0.00330529
Pomc	2.32931e+06	0.45112	3.77039	0.000162992	0.00347624
Kif21b	898.721	0.419241	3.75692	0.000172018	0.00361635
Slc37a2	258.075	0.401064	3.75683	0.000172078	0.00361635
D030047H15Rik	122.395	0.451434	3.75612	0.000172566	0.00362252
AI504432	478.469	-0.371388	-3.74807	0.000178202	0.00371165
Fhl4	73.0793	-0.391047	-3.74704	0.000178931	0.00371855
Stk40	1692.04	0.350655	3.73693	0.000186283	0.00381198
Osmr	119.097	0.367683	3.73256	0.00018954	0.00387015
4930515G01Rik	44.8463	-0.432313	-3.72525	0.000195125	0.00395821
AK081796	130.514	0.335512	3.71985	0.000199343	0.00401761
BC031451	130.672	0.372231	3.71912	0.000199921	0.00402492
AK030561	674.027	-0.435498	-3.7037	0.000212474	0.00423656
Sprn	484.714	-0.32724	-3.70171	0.00021415	0.00425182
Ago2	1646.58	0.326617	3.70028	0.000215361	0.00427133
Cstad	52.2592	0.425484	3.69734	0.000217869	0.00430735
Sec16b	1479.28	-0.380257	-3.69528	0.000219643	0.00432868
Zbtb3	88.2326	-0.336644	-3.69052	0.000223792	0.00440116
Spp1	2871.83	0.40254	3.68851	0.000225574	0.00442223
Slc8a3	201.274	-0.400349	-3.68629	0.000227549	0.00445094
Pde7b	918.791	-0.421085	-3.68579	0.00022799	0.00445094
Siah3	80.1603	0.418897	3.68452	0.000229131	0.00446853
Pde1a	647.938	0.341099	3.68283	0.000230658	0.00449363
Exph5	478.243	-0.355323	-3.67777	0.00023528	0.00454576
Zfp647	139.861	-0.323564	-3.67578	0.000237127	0.00457198
Cep72	111.559	0.391456	3.67285	0.000239856	0.00461402
Arpp21	254.24	0.441534	3.67001	0.000242538	0.00465229
AK045483	79.4371	-0.404178	-3.6694	0.000243124	0.00465398
Ccng2	829.297	-0.348878	-3.66596	0.000246414	0.00470251
Ubxn10	846.017	-0.339821	-3.66256	0.000249704	0.00473147
Sult2b1	179.168	0.380601	3.65878	0.000253419	0.00477763
Cdkn1a	364.338	0.358953	3.65624	0.000255943	0.00480467
AK138383	87.3548	-0.332455	-3.6558	0.000256381	0.00480467
Ctsk	90.0669	0.322473	3.65407	0.000258115	0.00482303
Mfhas1	1013.79	0.359994	3.65404	0.000258151	0.00482303
Mme	812.426	0.408698	3.65241	0.000259791	0.00484882
Klf2	178.948	0.394547	3.64822	0.000264066	0.00490899
Fhdc1	151.335	0.370954	3.6461	0.000266255	0.0049252
Bub1b	172.39	0.416313	3.6414	0.000271159	0.00499119
Dgkb	352.695	0.384333	3.63939	0.000273284	0.00500108
Lgals1	1125.77	0.400315	3.63748	0.000275314	0.00502804
Gemin4	81.2578	-0.361615	-3.63684	0.000276006	0.00503575
Rps6kl1	411.32	-0.341957	-3.63478	0.000278216	0.00506619
Apod	4141	0.385599	3.63261	0.000280567	0.00508956
Psat1	784.9	0.385222	3.63259	0.000280589	0.00508956
Cyp2t4	348.369	0.431841	3.62862	0.000284941	0.00515848
Pde6g	18.0335	0.427327	3.62804	0.000285584	0.00516013
Thrb	3424.83	-0.403541	-3.62374	0.000290368	0.00522635
2010016I18Rik	42.9717	-0.423003	-3.62337	0.000290785	0.0052288
Ap1s2	1527.59	0.339874	3.62084	0.000293652	0.00526517
Trpv2	126.464	0.353435	3.60555	0.000311497	0.00554785
Wnt9a	446.852	-0.33235	-3.60314	0.00031439	0.00557282
Fitm1	43.0639	-0.426125	-3.60207	0.00031569	0.00559055
Nkrf	263.337	0.395516	3.59879	0.000319704	0.00565093
Vstm4	232.415	0.387615	3.59768	0.000321068	0.00566967
Ccl11	44.9253	0.434752	3.59306	0.000326813	0.0057548
Palmd	812.251	0.358891	3.5909	0.000329538	0.00579187
Krt17	85.4461	0.435846	3.58805	0.000333163	0.00583911
Muc1	55.3796	0.394034	3.58552	0.000336406	0.00587507
Etv1	2283.35	0.400745	3.57991	0.00034371	0.00595137
Pla1a	45.314	0.383607	3.5756	0.000349426	0.00601759
Ptchd2	515.193	0.354142	3.57267	0.000353363	0.00606791
Kif26a	195.055	0.429337	3.57155	0.000354879	0.00608276
Bbc3	372.737	-0.378008	-3.56848	0.000359063	0.00614319
Fam198a	70.5307	0.422473	3.56267	0.000367104	0.00624076
Ssr2	5743.11	-0.344737	-3.56177	0.000368366	0.00625653
Ccdc109b	1434.31	0.367038	3.55823	0.000373358	0.00632407
Gm9949_	56.3533	0.415902	3.55494	0.00037806	0.00639791
Spag4	61.7114	0.408357	3.55286	0.000381067	0.00643714
Mdh1b	58.7946	0.377903	3.54522	0.000392291	0.00657914
AF357376	8.14489	0.407814	3.53657	0.000405355	0.00674376
Gm7120	571.742	0.406956	3.5349	0.000407922	0.00678044
Sox18	97.518	-0.390244	-3.53423	0.000408972	0.00678742
Tekt5	117.425	0.391623	3.53005	0.000415476	0.0068496
Oacyl	24115.5	0.428026	3.52676	0.000420675	0.00690581
AK077353	1209.01	0.42168	3.52452	0.000424251	0.00693644
Fat4	294.557	0.368576	3.5208	0.000430245	0.00701698
Ngef	219.954	0.421145	3.51826	0.000434383	0.00705703
Zfp773	88.672	-0.381067	-3.51557	0.000438803	0.00711645
5330429B09Rik_	822.755	0.350745	3.51078	0.000446802	0.00721825
Hic1	188.633	0.359313	3.51011	0.000447922	0.00721825
Slc35d3	105.661	0.406365	3.50248	0.000460954	0.00739863
Ninj2	18.4165	0.423061	3.50222	0.000461394	0.00739934
Smad6	172.064	0.377276	3.49724	0.000470096	0.0074932
Tmem100	124.028	0.377101	3.49681	0.000470857	0.0074932
S100a9	85.9911	0.348682	3.49216	0.000479135	0.00760551
Crybb3	36.0593	0.400448	3.48828	0.000486134	0.00769047
AK051222	56.036	0.400174	3.48466	0.000492767	0.00776909
P3h1	1457.9	-0.337255	-3.48305	0.00049573	0.00780263
Klhl29	458.685	0.328913	3.47913	0.000503037	0.00790432
Slc24a3	721.523	0.36013	3.47755	0.000506011	0.0079377
Nupr1	226.411	0.351332	3.47689	0.000507259	0.00794394
Fmo2	144.557	0.362679	3.46645	0.000527387	0.00820414
Rel	68.5021	0.41647	3.45927	0.000541644	0.00834258
Fam20a	110.41	0.389015	3.45237	0.000555689	0.00853778
Rrad	184.989	0.377709	3.44759	0.000565619	0.00867608
S100a8	49.4341	0.326294	3.44643	0.000568048	0.00868659
Fbxo5	102.295	-0.32688	-3.44494	0.000571182	0.00872558
Mir6935	9.60935	0.374734	3.43733	0.000587473	0.00892338
Il23a	54.1303	0.405932	3.43389	0.000594986	0.00901057
Ano4	219.263	-0.391307	-3.42988	0.000603853	0.00911205
Ildr2	890.46	0.373493	3.42968	0.000604283	0.00911205
Cd7	64.6248	0.407854	3.42543	0.000613834	0.0092062
Vax1	150.305	0.415337	3.41558	0.000636475	0.00948266
Gpx8	244.652	0.331187	3.41365	0.000640983	0.00954221
Perp	1354.41	-0.400288	-3.40914	0.000651684	0.00963244
Zfp184	212.716	0.405513	3.40773	0.000655064	0.00966711
Xkr6	111.869	0.411442	3.4048	0.000662122	0.00973283
Dusp8	1022.04	0.409699	3.40437	0.000663165	0.00974049
Extl1	196.24	0.405516	3.40084	0.000671783	0.00984643
Ccdc155	207.39	0.406551	3.39939	0.000675372	0.00988094
Fgfbp3	275.16	0.374956	3.39473	0.000686956	0.010019
Pim3	1599.81	0.363691	3.39192	0.000694039	0.0100719
Plxnc1	464.174	0.351608	3.38913	0.000701139	0.0101467
AK158189	95.022	-0.32262	-3.38652	0.000707856	0.0102278
Rbfox3	770.446	0.40598	3.38639	0.000708191	0.0102278
Rspo4	325.955	0.394159	3.38478	0.000712344	0.0102691
2810047C21Rik1	97.4083	-0.418731	-3.38337	0.000716032	0.0102984
AK009335	61.1464	0.389108	3.38164	0.00072054	0.0103172
4930529M08Rik	817.346	-0.357825	-3.37667	0.000733685	0.0104797
Gm16062	126.391	0.387941	3.37287	0.000743888	0.0106011
Il34	109.576	0.378515	3.37053	0.00075023	0.0106406
Gm16793	94.727	0.391308	3.3696	0.000752768	0.0106545
Trpc3	175.63	0.375051	3.36847	0.000755876	0.0106823
Pla2g4a	82.6514	0.365682	3.36703	0.000759833	0.0107059
Abca8a	1104.39	0.396461	3.36521	0.000764849	0.0107441
Scara3	956.094	0.385809	3.35826	0.000784345	0.0109711
Parvg	57.2492	0.358538	3.3383	0.00084293	0.0116569
Pus7l	80.5839	-0.347708	-3.33495	0.000853155	0.0117635
AK148422	74.3688	0.382131	3.33432	0.000855073	0.0117639
Fbln2	388.013	0.400818	3.32126	0.000896118	0.0122028
Filip1l	109.257	0.354953	3.31635	0.000912017	0.0123748
AK048598	110.718	-0.324317	-3.31634	0.000912061	0.0123748
1810012K16Rik	73.9723	-0.355166	-3.31187	0.00092675	0.0125286
Csdc2	966.32	0.374956	3.31165	0.000927488	0.0125295
AK076668	27.9042	0.400346	3.30981	0.000933604	0.0125939
Il20ra	58.2629	0.399346	3.30109	0.000963097	0.0128497
Camp	21.7875	0.344038	3.30035	0.000965656	0.01285
Rasal1	241.331	0.323848	3.29651	0.000978945	0.0129743
Mfap4	274.349	-0.33534	-3.29637	0.000979424	0.0129743
Myzap	57.7509	0.379716	3.29625	0.000979859	0.0129743
Tmem202	36.9616	0.369882	3.28433	0.00102225	0.013412
Tmem163	329.232	0.373369	3.28376	0.00102431	0.0134297
Gdf15	44.4914	0.356223	3.26238	0.00110481	0.0141864
Lrrc73	783.632	0.322607	3.25426	0.00113687	0.0144589
Ngp	69.5421	0.32549	3.25341	0.00114029	0.0144729
Nptx2	281.845	0.395766	3.25225	0.00114495	0.0144973
Mmd2	1101.22	-0.333043	-3.24636	0.00116893	0.0147263
Ccdc122	85.6848	0.331124	3.23722	0.00120699	0.0150636
DQ722402	5.61659	-0.342524	-3.23564	0.00121371	0.0151273
Btg2	5980.48	0.387703	3.23016	0.00123722	0.0153485
Stc2	259.527	0.393459	3.22955	0.00123984	0.0153628
Ypel1	257.615	0.347258	3.22918	0.00124146	0.0153705
TRNA_Leu	7.13771	0.366313	3.22378	0.00126513	0.0156222
Pdgfa	154.287	0.32723	3.22044	0.00127994	0.0157738
BC002288	38.2551	0.39024	3.21619	0.00129903	0.0159251
AK039091	195.582	0.363359	3.214	0.00130898	0.016026
Spata2l	403.754	0.386367	3.21316	0.00131283	0.0160577
AK036329	50.9257	0.388902	3.21306	0.00131329	0.0160577
Gsto1	341.468	0.322255	3.20737	0.00133953	0.0163039
Pkib	415.018	0.374941	3.20271	0.00136142	0.0164863
Reep6	159.707	0.369384	3.19649	0.00139112	0.0167571
Zfp947	81.7463	-0.334259	-3.18365	0.00145429	0.017295
Twist1	35.9441	0.370974	3.18101	0.00146762	0.0174008
Smco2	147.318	-0.386924	-3.18034	0.00147103	0.0174165
Fat3	475.215	0.354039	3.17878	0.00147896	0.0174882
Kif23	60.1435	0.357247	3.17745	0.00148577	0.0175244
AK018092	292.121	-0.359969	-3.17558	0.00149538	0.0176266
Klhl35	66.207	-0.35278	-3.17445	0.0015012	0.0176729
Kcnh1	566.935	0.371668	3.17355	0.00150585	0.0176942
Ppp1r14a	294.56	-0.359632	-3.17218	0.00151297	0.0177556
DQ546336	26.0712	0.382832	3.16982	0.00152533	0.0178616
Adprhl1	103.298	-0.37235	-3.16707	0.00153986	0.0179583
Mmp23	165.776	0.322159	3.16496	0.00155105	0.018055
AK030777	43.1792	-0.364592	-3.15521	0.00160381	0.0184963
AK046721	103.267	-0.359516	-3.1499	0.00163328	0.0187667
AK020849	52.0941	0.334638	3.14779	0.00164508	0.0188558
2610016A17Rik	9.27197	0.34357	3.14701	0.00164947	0.0188811
Kirrel3	372.547	0.344286	3.14686	0.00165032	0.0188811
Ngfr	147.566	0.385332	3.13934	0.00169328	0.0191955
Kdelr3	735.659	-0.366934	-3.13562	0.00171489	0.019392
Snai2	125.797	-0.383687	-3.13152	0.00173905	0.0195491
Hes7	23.2857	0.375871	3.12938	0.00175175	0.0196801
Gldc	541.195	0.379611	3.12819	0.00175889	0.0197429
AK021191	23.4163	-0.366041	-3.12738	0.00176373	0.0197569
Tmem45a	539.122	-0.363496	-3.12103	0.00180218	0.0201497
Mir7027	5.47139	0.331764	3.11867	0.00181671	0.0202515
Trib3	241.418	0.371406	3.11662	0.00182938	0.0203442
Tyro3	209.552	0.327661	3.11565	0.00183538	0.0203867
Wdr72	297.028	0.338839	3.11457	0.00184213	0.0204495
Pglyrp1	15.4876	0.324143	3.11317	0.00185088	0.0204898
Akr1c14	2363.62	-0.356342	-3.10508	0.00190227	0.0208202
Hopx	576.127	0.347339	3.1026	0.00191831	0.0209467
Adamtsl4	186.949	0.324125	3.10211	0.00192145	0.0209658
Kcnk5	115.848	0.36625	3.10014	0.00193427	0.0210594
AK042126	24.5181	0.376647	3.09922	0.00194031	0.0211006
Ano1	516.033	0.354736	3.097	0.00195493	0.021161
Slc1a1	137.062	0.376102	3.09502	0.00196802	0.0212657
AK079730	53.8535	-0.340059	-3.08889	0.00200908	0.021597
Slit1	1557.39	0.357047	3.07951	0.00207341	0.0221484
Scnn1g	192.563	-0.368628	-3.07354	0.00211532	0.022506
AK035979	58.4735	0.366119	3.07048	0.00213712	0.0226703
Rnf183	202.619	-0.35855	-3.06168	0.00220101	0.023141
Epx	60.6538	0.355869	3.05983	0.0022146	0.0232577
Tex11	66.2957	0.364016	3.05735	0.00223304	0.0234249
Tnc	103.622	0.324563	3.05573	0.00224516	0.0235279
Ppargc1b	73.6117	0.338333	3.05465	0.00225322	0.0235705
Fibin	283.927	0.322674	3.05425	0.00225627	0.0235819
2900057B20Rik	34.9204	0.342374	3.0505	0.00228461	0.0238322
AK053029	148.415	-0.323443	-3.04758	0.00230691	0.0239711
Gpr135	319.839	0.363201	3.04528	0.00232463	0.0240505
Chil1	104.033	0.361639	3.04383	0.0023359	0.0240811
Ctrl	24.1466	0.365702	3.03447	0.00240962	0.0246829
Grin3b	66.1089	0.330433	3.03309	0.0024206	0.0247417
Slc17a9	1123	-0.340339	-3.02841	0.00245847	0.0250172
Sema3e	757.023	0.3458	3.02178	0.00251294	0.0254192
Lrp2	160.822	0.367321	3.01969	0.0025303	0.0255809
Nrip3	971.475	0.333411	3.00997	0.00261273	0.026258
Samd4	150.622	0.324155	3.00783	0.00263116	0.026429
Slc4a10	1173.85	0.351799	3.00624	0.00264504	0.0265542
AF357426	15.4282	0.360662	3.00556	0.00265096	0.0265573
1190002F15Rik	85.162	0.323538	3.0032	0.0026716	0.026706
Fut1	117.735	0.352348	3.00296	0.00267371	0.0267128
AK145129	624.017	0.352577	2.99824	0.00271544	0.0270285
Tmem210	28.3112	0.365455	2.99097	0.00278094	0.0274698
Mir24-2	34.3577	0.362836	2.98877	0.00280105	0.027645
Slc4a11	64.1348	0.357372	2.98607	0.00282591	0.0278169
Ccbe1	140.676	0.324246	2.97135	0.0029649	0.0288056
C2cd4b	201.04	0.362398	2.9667	0.00301018	0.0290252
Rtp1	81.4134	-0.358005	-2.96575	0.00301945	0.0290786
Rbp7	36.7678	0.358195	2.96538	0.00302308	0.0290985
Gria3	284.831	0.324255	2.96018	0.00307457	0.0294878
Cidea	1039.79	0.337945	2.95028	0.0031749	0.0302327
DQ546337	38.5505	0.339758	2.94447	0.00323511	0.0306336
Mmrn1	153.516	-0.324259	-2.94231	0.00325777	0.0307709
Ccdc33	65.2801	-0.343926	-2.93377	0.00334867	0.0313757
Catsperd	60.4749	0.322558	2.93132	0.00337525	0.0315435
Ier5l	45.5611	0.356622	2.92258	0.00347148	0.0320918
Slc2a2	45.8737	-0.327682	-2.91809	0.00352188	0.0324027
Bco2	79.2635	0.327352	2.91672	0.00353733	0.0324916
Rerg	371.395	-0.335533	-2.91188	0.00359262	0.0329024
Scn2a1	759.452	0.326932	2.88323	0.00393616	0.0350137
Tmem200a	314.628	0.345898	2.87387	0.00405477	0.035852
Col23a1	667.475	0.348146	2.86226	0.00420632	0.0366474
Lhx2	93.7293	0.351397	2.85924	0.00424658	0.0368892
Adamtsl1	115.502	0.330434	2.85269	0.00433507	0.0375659
Gm13446	96.3363	-0.342536	-2.85123	0.00435502	0.0376863
AK015183	32.1678	0.342324	2.84995	0.00437266	0.0377865
C1rl	69.5109	0.32881	2.83573	0.00457214	0.0390229
Irf7	253.379	0.327333	2.83229	0.00462165	0.0393557
Srxn1	5412.55	0.342767	2.83183	0.00462831	0.0393944
Ecel1	6155.14	-0.340106	-2.82157	0.00477889	0.0402724
B230209E15Rik	55.4365	0.341875	2.81445	0.004886	0.0408399
Tbx6	107.283	0.326789	2.81332	0.00490333	0.0409217
Dio1	151.656	0.341871	2.81206	0.00492253	0.0409655
Serpinb3c	57.8086	0.353678	2.80932	0.00496463	0.0411527
Cyp4f15	91.9543	0.33838	2.80621	0.00501284	0.0414458
Msc	63.0865	0.358276	2.79918	0.00512331	0.0420927
Ciart	284.257	0.327615	2.79707	0.00515676	0.0422746
Clec2l	117.838	-0.338856	-2.79543	0.00518301	0.0423782
Gm17660	29.3565	0.332195	2.79097	0.00525495	0.0428352
B230206H07Rik	101.131	0.327754	2.77962	0.00544221	0.0439011
1600002D24Rik	37.6731	-0.334108	-2.77583	0.00550603	0.0442129
AK039595	17.164	0.339937	2.76843	0.00563274	0.0450499
Pcsk6	7728.3	-0.339972	-2.75084	0.00594424	0.0466623
Cgref1	450.248	-0.333677	-2.74706	0.00601328	0.0469478
Hcrtr1	93.4818	-0.324737	-2.74166	0.00611293	0.0475266
Abcb1b	302.659	0.323613	2.73857	0.00617065	0.0477772

## Sheet: Sex_Female_vs_Male
Gene	baseMean	log2FoldChange	stat	pvalue	padj
Xist	17228.4	4.76297	36.8858	7.80836e-298	1.68692e-293
Ddx3y	1238.9	-8.28614	-29.4617	8.90606e-191	9.62032e-187
Eif2s3y	896.379	-8.03526	-25.7708	1.88646e-146	1.3585e-142
Kdm5d	535.001	-7.53462	-25.1668	9.24661e-140	4.99409e-136
Uty	404.579	-7.53369	-23.1868	6.18742e-119	2.67346e-115
1700024P16Rik	292.049	-1.94004	-22.2781	6.02288e-110	2.16864e-106
Gpr101	80.3145	-4.18731	-21.877	4.29819e-106	1.32655e-102
Kdm6a	1662.56	0.788443	21.6586	5.04416e-104	1.36217e-100
Gpr52	189.321	2.47139	20.1005	7.30046e-90	1.75244e-86
Grem1	163.88	-3.21381	-19.8105	2.41693e-87	5.22153e-84
Gucy2f	339.089	2.16942	19.1005	2.50316e-81	4.91621e-78
Dmrta1	195.855	2.66875	19.0726	4.26401e-81	7.67663e-78
Serpina3c	47.0052	-3.59829	-18.8483	3.03313e-79	5.04059e-76
Cd109	145.463	-1.63145	-18.07	5.49575e-73	8.48073e-70
Ramp1	354.226	-1.81649	-18.0179	1.40913e-72	2.02952e-69
Pcdh11x	221.535	1.41634	17.8631	2.28429e-71	3.08436e-68
Cdkl4	559.227	1.73132	17.6989	4.27685e-70	5.43512e-67
Maob	565.953	-1.27983	-17.6925	4.79356e-70	5.75333e-67
Rxfp1	641.366	2.89572	17.6811	5.86301e-70	6.66655e-67
Wfdc2	534.956	-1.32588	-17.6058	2.22169e-69	2.39987e-66
Phldb2	1314.69	1.45656	17.4929	1.623e-68	1.66968e-65
Cldn8	615.834	1.51475	17.3905	9.74444e-68	9.56904e-65
Eif2s3x	3040.89	0.584731	17.3176	3.46367e-67	3.25344e-64
Kctd4	888.706	1.51916	16.9907	9.62934e-65	8.66801e-62
Kdm5c	3671.59	0.549165	16.5375	1.96923e-61	1.70173e-58
Drd4	33.0826	-3.44303	-16.4883	4.45488e-61	3.70166e-58
Nnat	107349	-1.17685	-16.1278	1.62669e-58	1.30159e-55
Crhbp	2845.99	1.52719	16.1136	2.04735e-58	1.57968e-55
Ano9	270.74	-1.69678	-16.0864	3.17535e-58	2.36553e-55
Gm10493_	36.2446	2.51228	16.0695	4.17367e-58	3.0056e-55
Chml	525.317	1.98853	15.9454	3.06473e-57	2.13582e-54
Cd44	264.043	1.32824	15.8246	2.10512e-56	1.42122e-53
C1ql2	597.466	1.26598	15.7483	7.0527e-56	4.61717e-53
Vwde	217.262	2.01175	15.6165	5.62495e-55	3.57416e-52
Agtr1a	939.898	-1.62402	-15.5064	3.14196e-54	1.9394e-51
Msc	63.0865	1.95377	14.6904	7.42772e-49	4.45746e-46
Ggt7	2513.58	-0.540585	-14.6037	2.66115e-48	1.55383e-45
Impg1	374.217	2.39546	14.4707	1.85443e-47	1.05429e-44
Ccdc80	1035.2	0.629183	14.3411	1.212e-46	6.71385e-44
AK084954	177.844	-1.16703	-14.2392	5.22982e-46	2.82463e-43
Homer2	1541.74	-0.920663	-14.0195	1.18524e-44	6.24537e-42
Aldh3a1	360.143	-0.995835	-13.988	1.84506e-44	9.26993e-42
BC021767	174.135	-1.16855	-13.9212	4.71064e-44	2.31293e-41
5530601H04Rik	878.029	0.523747	13.868	9.90254e-44	4.7541e-41
Reln	2971.51	2.11194	13.7606	4.40082e-43	2.06685e-40
Opn3	120.932	2.22151	13.7532	4.87377e-43	2.24027e-40
Spock3	313.192	1.28012	13.6786	1.36359e-42	6.13727e-40
Mtmr7	1632.7	-0.532686	-13.6553	1.87612e-42	8.27179e-40
Akr1c14	2363.62	2.12512	13.6293	2.67981e-42	1.15789e-39
Frmpd1	310.956	-0.934955	-13.6103	3.47837e-42	1.47347e-39
Myo5c	734.158	1.10728	13.576	5.55422e-42	2.30757e-39
Id1	549.654	1.62897	13.5636	6.58441e-42	2.68395e-39
Kndc1	674.014	-0.706255	-13.5547	7.43036e-42	2.97269e-39
Uchl1	3605.51	-0.519654	-13.5504	7.87912e-42	3.09492e-39
Sytl3	299.837	-1.21739	-13.4915	1.75443e-41	6.76833e-39
Igsf1	10963.7	-0.959048	-13.4835	1.95682e-41	7.41669e-39
Miat	3147.14	-0.890039	-13.4439	3.34509e-41	1.24599e-38
Kcnma1	1119.02	-0.576169	-13.4033	5.78696e-41	2.11901e-38
Ar	341.549	0.856961	13.3181	1.81747e-40	6.54409e-38
Nhlh2	274.185	2.30975	13.312	1.97252e-40	6.98596e-38
Gpr149	608.922	1.18877	13.3051	2.1619e-40	7.53316e-38
Nmnat2	1299.25	-0.845317	-13.279	3.06267e-40	1.05025e-37
Lcn2	1479.61	-1.35818	-13.2701	3.44927e-40	1.16434e-37
AK037070	775.217	0.668252	13.2291	5.95973e-40	1.98083e-37
Clmn	2089.42	-0.641971	-13.218	6.90865e-40	2.26143e-37
Igsf10	284.485	1.24818	13.1905	9.94688e-40	3.20735e-37
Cntnap1	1417.92	0.657514	13.1388	1.97435e-39	6.27261e-37
Col4a4	217.607	-1.18581	-13.1199	2.53334e-39	7.93192e-37
Mboat1	249.931	-0.752659	-13.0286	8.41808e-39	2.59806e-36
Fam102a	2842.93	0.665394	12.9973	1.2668e-38	3.85465e-36
Cadps2	2703.01	0.610647	12.9219	3.38888e-38	1.01685e-35
Epb4.1l4a	1089.78	-0.636025	-12.873	6.38567e-38	1.88981e-35
Ehf	393.983	1.42855	12.835	1.04373e-37	3.04712e-35
Dapl1	497.837	-1.57542	-12.7748	2.26682e-37	6.52965e-35
Fam43a	789.801	0.918688	12.6997	5.93717e-37	1.68772e-34
Grp	22.374	-2.01982	-12.6976	6.09875e-37	1.71113e-34
Serpinb1a	93.3704	-1.63059	-12.5497	3.99046e-36	1.10525e-33
Stard5	1067.83	-0.745681	-12.493	8.14923e-36	2.2007e-33
Kcnip4	159.394	1.57016	12.4607	1.22305e-35	3.26207e-33
Ffar4	209.103	-1.03857	-12.391	2.92362e-35	7.70267e-33
5031439G07Rik	1545.85	1.0309	12.3786	3.4121e-35	8.88133e-33
Cd274	533.794	-0.516187	-12.3274	6.45024e-35	1.65894e-32
Pgr	618.198	1.37411	12.2788	1.17778e-34	2.9935e-32
Thy1	3626.32	-1.06633	-12.2597	1.49141e-34	3.74657e-32
Chrna9	105.515	1.60813	12.2408	1.88079e-34	4.67041e-32
Kcna5	849.046	-0.852904	-12.2384	1.93777e-34	4.75723e-32
Fkbp5	1984.48	-0.896424	-12.2139	2.6191e-34	6.35765e-32
Alox15	494.989	-1.14774	-12.203	2.99607e-34	7.19189e-32
Gm13446	96.3363	1.96715	12.1959	3.26996e-34	7.7631e-32
Msrb3	437.796	0.639839	12.1013	1.0394e-33	2.44079e-31
A2m	884.793	-1.3188	-12.0835	1.29091e-33	2.9988e-31
Grm5	147.214	1.93767	12.0399	2.19306e-33	5.0403e-31
Nxpe3	407.531	-0.632293	-12.0325	2.39778e-33	5.4528e-31
Lgi3	311.675	-0.752003	-11.985	4.25678e-33	9.57954e-31
Gm1604b	654.934	1.95672	11.9679	5.23092e-33	1.16504e-30
Ptx4	29.1725	-1.60363	-11.9429	7.07385e-33	1.55942e-30
Osbpl10	469.838	-0.675218	-11.9375	7.54692e-33	1.6469e-30
Ssfa2	1473.72	0.780488	11.9205	9.26055e-33	2.00065e-30
Id3	856.598	1.33568	11.8969	1.22785e-32	2.62638e-30
Dcbld1	212.363	0.827577	11.826	2.86332e-32	6.06462e-30
Pknox2	780.261	0.644345	11.8101	3.46175e-32	7.26094e-30
Dapp1	848.669	-0.713022	-11.7609	6.20832e-32	1.28966e-29
Glt8d2	115.451	-1.49527	-11.751	6.98259e-32	1.43668e-29
Col4a3	332.643	-1.07381	-11.7344	8.49076e-32	1.73051e-29
Nckap1l	613.585	-0.861775	-11.6414	2.53669e-31	5.12174e-29
Rasgrf1	1637.45	0.952461	11.5782	5.31471e-31	1.06314e-28
Dennd2c	82.2328	-1.11527	-11.5516	7.24983e-31	1.43693e-28
Kcnk2	2033.51	-0.538222	-11.5296	9.36043e-31	1.83839e-28
Endou	62.1748	1.74258	11.5093	1.18416e-30	2.30475e-28
Adcy7	457.939	-0.686021	-11.4497	2.36091e-30	4.51373e-28
Dusp15	60.6722	1.30587	11.3922	4.57283e-30	8.66591e-28
Slc35f1	338.902	1.12173	11.3876	4.81869e-30	9.05243e-28
Kcnip1	86.7577	1.57575	11.3702	5.88333e-30	1.09572e-27
Zfp804a	177.569	1.89083	11.3582	6.75544e-30	1.24739e-27
Mum1l1	979.092	-0.726034	-11.2962	1.37072e-29	2.50958e-27
Sgcz	86.929	1.5397	11.2927	1.42564e-29	2.58819e-27
Grik4	196.093	-1.04425	-11.2903	1.46502e-29	2.63753e-27
Medag	629.154	0.845233	11.2505	2.30405e-29	4.11377e-27
Camk1d	598.449	-0.712352	-11.244	2.47819e-29	4.38842e-27
Olfm4	671.185	0.669934	11.171	5.65644e-29	9.9351e-27
Tub	1591.12	-0.636016	-11.0898	1.406e-28	2.43003e-26
Pcdh9	775.375	0.763965	11.0885	1.42703e-28	2.44679e-26
Hacd2	546.952	-0.450338	-10.9954	4.02277e-28	6.84314e-26
Slit2	1108.7	0.59423	10.9689	5.39319e-28	9.10269e-26
Ano4	219.263	1.2584	10.9623	5.80239e-28	9.71743e-26
Tmem106b	4275.82	0.324916	10.9465	6.91018e-28	1.14836e-25
1500012F01Rik	1547.26	0.638188	10.9418	7.27076e-28	1.19906e-25
Ecel1	6155.14	1.41561	10.9238	8.86762e-28	1.45133e-25
Pvt1	162.624	0.955085	10.923	8.94597e-28	1.45315e-25
Scg2	94552.1	-0.872041	-10.9134	9.94868e-28	1.60397e-25
Man2a1	3157.81	-0.556617	-10.9116	1.0149e-27	1.62415e-25
Sh3d19	996.232	1.04203	10.9058	1.08154e-27	1.71806e-25
Gfod1	505.694	0.839827	10.8844	1.36771e-27	2.15678e-25
Pianp	1597.79	0.85566	10.8827	1.39334e-27	2.18128e-25
Bdkrb2	318.025	-1.71143	-10.8585	1.81718e-27	2.82435e-25
Lmo2	501.877	-0.779892	-10.8567	1.85336e-27	2.86e-25
Lrpap1	6873.62	-0.32715	-10.849	2.01596e-27	3.08886e-25
Ky	635.779	0.743641	10.8477	2.04536e-27	3.11182e-25
Gnb3	4015.69	-0.758743	-10.8112	3.04684e-27	4.5711e-25
Cckar	65.5201	1.47654	10.8077	3.16387e-27	4.71395e-25
Asic1	2602.94	-0.569384	-10.8068	3.19642e-27	4.72983e-25
Ptprs	8480.36	0.429185	10.8021	3.36436e-27	4.94447e-25
Hmcn1	1698.7	0.79132	10.7856	4.02681e-27	5.87805e-25
Myo1b	2952.06	-0.850427	-10.7718	4.67701e-27	6.78135e-25
Usp3	1476.03	-0.40426	-10.7385	6.71185e-27	9.64643e-25
Slitrk5	333.808	1.17266	10.7381	6.74232e-27	9.64643e-25
Irf6	1464.13	-0.339995	-10.7297	7.38744e-27	1.04999e-24
Jak1	4300.51	-0.327914	-10.7153	8.62997e-27	1.21066e-24
AK155692	4026.01	0.947854	10.7131	8.83297e-27	1.23114e-24
AI593442	2276.93	0.746309	10.704	9.74647e-27	1.34976e-24
Sema3a	433.274	1.04476	10.6968	1.05377e-26	1.45004e-24
Arhgap36	1332.2	-1.11027	-10.6918	1.11212e-26	1.52065e-24
Slc7a7	250.953	1.10997	10.6829	1.2243e-26	1.66351e-24
Six6	3736.29	0.46774	10.6812	1.24636e-26	1.6829e-24
Frmpd4	335.208	1.44875	10.606	2.79338e-26	3.70234e-24
Erc2	565.938	-0.56285	-10.588	3.38703e-26	4.46179e-24
Pfkp	1906.66	-0.450669	-10.5459	5.30512e-26	6.94617e-24
Il18bp	897.661	-0.453965	-10.5239	6.7016e-26	8.72177e-24
Kcnd3	1384.54	0.491834	10.5033	8.34095e-26	1.07903e-23
Masp1	315.575	-0.606357	-10.502	8.45638e-26	1.08745e-23
Fam129a	738.549	-0.629455	-10.4934	9.25963e-26	1.1837e-23
Evc2	659.82	-0.514869	-10.4775	1.09644e-25	1.39339e-23
Bcan	2508.81	0.967894	10.4754	1.12044e-25	1.41555e-23
Myoc	2042.95	-0.852239	-10.4173	2.06638e-25	2.59547e-23
Adcy2	889.689	-0.737418	-10.3793	3.08125e-25	3.84782e-23
Nrp2	533.399	-0.507009	-10.3709	3.36411e-25	4.17691e-23
Bace2	474.098	0.650694	10.3684	3.45122e-25	4.26058e-23
Tspan17	779.675	-0.512033	-10.3674	3.48891e-25	4.28263e-23
Stxbp1	4399.16	0.364169	10.3369	4.79809e-25	5.85638e-23
Myo3b	194.876	-0.878654	-10.3303	5.14077e-25	6.23939e-23
Upk3a	304.033	-0.96468	-10.3172	5.89439e-25	7.1141e-23
Thsd7a	1402.22	0.607977	10.2995	7.08084e-25	8.49858e-23
Tspan7	4359.38	0.954873	10.2845	8.27337e-25	9.87503e-23
Cgn	1152.34	-0.576131	-10.2749	9.13972e-25	1.08463e-22
Pak7	124.481	1.83481	10.2669	9.93233e-25	1.16619e-22
Rhbdl3	274.584	1.02886	10.2062	1.85936e-24	2.16974e-22
St3gal4	425.09	0.538658	10.2058	1.86804e-24	2.16974e-22
Zfp704	1425.97	0.36608	10.1739	2.59193e-24	2.99444e-22
Kcnmb4	764.502	-0.696755	-10.1641	2.86732e-24	3.29498e-22
Greb1l	266.848	-0.579109	-10.1528	3.21982e-24	3.68048e-22
Pcsk1	5759.51	-0.687659	-10.133	3.94188e-24	4.48213e-22
Rabgap1l	716.041	0.555869	10.1228	4.37687e-24	4.95067e-22
Lrrtm2	475.17	1.05597	10.1072	5.13288e-24	5.77556e-22
Rap1gap	2309.86	-0.806536	-10.0607	8.2445e-24	9.18114e-22
Slc8a3	201.274	1.04342	10.0573	8.53179e-24	9.45234e-22
Bag2	1332.97	-0.75912	-10.0535	8.87014e-24	9.77707e-22
Gpr22	135.285	1.21765	10.0488	9.29497e-24	1.01933e-21
Serpinb8	227.443	1.11532	10.0366	1.0519e-23	1.14774e-21
Shc2	331.324	1.16523	9.98223	1.82317e-23	1.97929e-21
Pls3	2443.62	-0.487454	-9.97243	2.01251e-23	2.17391e-21
C330013F16Rik	438.046	-1.19991	-9.96438	2.18227e-23	2.34556e-21
Fam174b	641.831	-0.532556	-9.95469	2.40577e-23	2.57298e-21
Rn45s	61445.9	1.04415	9.9518	2.4766e-23	2.63569e-21
D8Ertd82e	258.812	1.33281	9.94991	2.52413e-23	2.6731e-21
Col24a1	623.966	-0.850791	-9.93822	2.83864e-23	2.97699e-21
4930447C04Rik	3162.43	0.44161	9.93691	2.87599e-23	3.00159e-21
Adamts9	382.879	-0.490506	-9.92242	3.32591e-23	3.43794e-21
Cyth3	731.81	-0.476094	-9.92181	3.3464e-23	3.44265e-21
Mmp8	180.958	-0.954302	-9.91843	3.46154e-23	3.54422e-21
Susd3	30.542	-1.24347	-9.90213	4.07482e-23	4.15247e-21
Smco2	147.318	1.43158	9.89528	4.36376e-23	4.42604e-21
Rps6ka2	2673.11	0.915161	9.88308	4.92949e-23	4.97648e-21
Rtn2	1274.37	0.576412	9.87845	5.16267e-23	5.16363e-21
Prrg1	72.8265	1.08402	9.8149	9.71381e-23	9.67084e-21
A830018L16Rik	250.997	0.939034	9.80599	1.061e-22	1.05146e-20
Tec	400.194	-0.609327	-9.80151	1.10917e-22	1.09417e-20
Mir6236	2092.2	0.943963	9.79518	1.18092e-22	1.15966e-20
Rnaset2a	113.462	1.01954	9.76405	1.60611e-22	1.57007e-20
Htra4	48.0176	-1.14179	-9.72554	2.34652e-22	2.28352e-20
Atp10a	516.306	-0.521945	-9.71888	2.50534e-22	2.42715e-20
Ina	909.927	0.588183	9.71493	2.6043e-22	2.51175e-20
Frmd6	480.377	-0.656782	-9.71266	2.66299e-22	2.55695e-20
Cpxm2	1934.26	0.509244	9.70946	2.74789e-22	2.62679e-20
Olfml2b	95.6124	-1.39605	-9.67255	3.94429e-22	3.75385e-20
Sorcs1	373.891	-1.00104	-9.6561	4.63175e-22	4.38879e-20
Galnt16	942.838	-0.881462	-9.63582	5.64419e-22	5.29815e-20
Cited2	1246.21	1.12857	9.63544	5.66503e-22	5.29815e-20
AK043847	269.12	-0.610612	-9.62745	6.12322e-22	5.70198e-20
Greb1	2439.36	1.27072	9.60342	7.73338e-22	7.17047e-20
Pitx2	4246.74	0.398347	9.60031	7.9705e-22	7.35874e-20
Dscam	1533.73	0.55177	9.57077	1.06116e-21	9.71576e-20
Rai1	2586.26	0.591349	9.55465	1.23997e-21	1.13031e-19
Ostf1	942.486	-0.624623	-9.5462	1.34536e-21	1.22122e-19
Csrp2	466.739	-0.5918	-9.54277	1.39062e-21	1.25703e-19
Marveld1	878.792	0.440118	9.51536	1.81093e-21	1.63014e-19
Lhb	18090.9	-0.683006	-9.45476	3.23765e-21	2.90233e-19
Stk26	264.81	-0.651016	-9.44696	3.48828e-21	3.11408e-19
Blcap	4339.34	-0.491168	-9.43957	3.74318e-21	3.32789e-19
Sestd1	1728.23	-0.463099	-9.43838	3.78595e-21	3.35212e-19
AK051008	56.6182	1.43489	9.4161	4.68161e-21	4.12822e-19
Casq2	90.6845	-1.07303	-9.41099	4.91498e-21	4.31639e-19
Stk32c	1150.82	-0.630407	-9.40672	5.1186e-21	4.47702e-19
Robo1	849.094	0.504162	9.39876	5.52113e-21	4.80961e-19
Ush1c	719.996	-0.706976	-9.36349	7.71453e-21	6.61368e-19
Chst10	931.542	-0.500165	-9.36067	7.9234e-21	6.76589e-19
Gm2a	2171.68	-0.475836	-9.35136	8.65311e-21	7.35992e-19
Gsk3b	2604.84	0.353049	9.31576	1.21083e-20	1.01811e-18
Pcdh10	457.772	1.12531	9.31573	1.21114e-20	1.01811e-18
Cbln1	472.166	-0.878701	-9.31372	1.23433e-20	1.03358e-18
4631405J19Rik	100.339	-0.837134	-9.30032	1.40021e-20	1.16796e-18
Cntnap2	1014.47	0.586654	9.27344	1.80242e-20	1.49767e-18
D430019H16Rik	1638.72	-0.700153	-9.26215	2.00364e-20	1.65849e-18
Lama1	495.98	-0.960774	-9.24998	2.24531e-20	1.85143e-18
Cdhr3	204.597	-1.06379	-9.24705	2.30764e-20	1.8956e-18
Acot12	78.7567	-1.07425	-9.23259	2.64168e-20	2.1474e-18
Ptchd2	515.193	0.805643	9.2325	2.64399e-20	2.1474e-18
Spata13	1767.64	-0.404862	-9.20716	3.34877e-20	2.69951e-18
Nes	1405.75	0.484445	9.20592	3.3875e-20	2.72058e-18
C1qtnf6	118.303	1.32168	9.18137	4.25639e-20	3.40574e-18
Plcg2	405.589	-0.614623	-9.17973	4.32182e-20	3.44533e-18
Rhoc	1332.21	-0.352684	-9.16199	5.09481e-20	4.04663e-18
Rftn1	187.828	-0.767427	-9.139	6.30314e-20	4.96982e-18
Prkcq	298.927	-0.74071	-9.13207	6.72044e-20	5.26045e-18
1500009L16Rik	153.154	-0.988371	-9.12831	6.95787e-20	5.42664e-18
Iqgap2	1402.61	-0.60442	-9.03458	1.64627e-19	1.27477e-17
Gabre	315.996	-0.657709	-9.02612	1.77874e-19	1.37242e-17
Elk3	1073.49	0.547479	9.02503	1.79643e-19	1.38114e-17
Ppp2r2c	2216.3	0.546329	9.0189	1.8998e-19	1.45029e-17
Synpo2	344.713	0.906846	9.01772	1.92046e-19	1.4609e-17
Nek7	2456.8	-0.421713	-8.99929	2.27176e-19	1.71605e-17
Tesc	543.84	-0.66878	-8.99808	2.29698e-19	1.72906e-17
Ptch2	770.548	-0.689672	-8.99331	2.39897e-19	1.79956e-17
B3galnt1	1748.46	-0.364117	-8.99202	2.42724e-19	1.81447e-17
Nxph3	203.331	0.949642	8.9768	2.78757e-19	2.07665e-17
Psen1	2787.32	-0.34318	-8.95879	3.28269e-19	2.43708e-17
Reck	1076.66	-0.560495	-8.95643	3.35358e-19	2.48119e-17
AK144265	1025	1.07237	8.9462	3.67923e-19	2.71283e-17
Ube2r2	2704	0.348197	8.93958	3.90665e-19	2.87072e-17
Gpr85	1136.81	0.666733	8.89938	5.61601e-19	4.09893e-17
Ccdc68	156.509	-0.776433	-8.89649	5.76409e-19	4.17877e-17
2610001J05Rik	1740.42	0.389739	8.88188	6.57398e-19	4.73414e-17
5730403I07Rik	445.122	-0.834389	-8.86839	7.42134e-19	5.30896e-17
Chst11	2241.39	1.15641	8.86257	7.81932e-19	5.5752e-17
Dusp7	629.545	0.389589	8.86179	7.8738e-19	5.59558e-17
Wasf1	494.031	0.588205	8.85656	8.25226e-19	5.8453e-17
Rnaset2b	6054.21	0.977249	8.81656	1.18025e-18	8.33275e-17
Cxxc5	3081.05	0.379868	8.81611	1.18501e-18	8.33904e-17
AK135767	89.9196	0.70156	8.80755	1.27907e-18	8.97175e-17
Susd4	483.056	-0.544871	-8.80353	1.32578e-18	9.26933e-17
Oaf	582.532	-0.37911	-8.77796	1.66462e-18	1.16008e-16
Col1a2	6423.36	0.832195	8.77163	1.76099e-18	1.2233e-16
Mocos	147.587	-0.5918	-8.76066	1.94115e-18	1.33983e-16
Gli1	214.565	-1.4917	-8.74784	2.17478e-18	1.49155e-16
Lpin2	2022.78	-0.409751	-8.74373	2.25529e-18	1.54187e-16
Mafb	214.391	0.667625	8.7237	2.69265e-18	1.82931e-16
Calb1	4035.98	0.868857	8.71225	2.97901e-18	2.01751e-16
Cga	109187	-0.65388	-8.70961	3.04925e-18	2.05221e-16
Abcb1b	302.659	0.997112	8.7061	3.14507e-18	2.11013e-16
Sytl4	5666.08	-0.447421	-8.69468	3.47801e-18	2.32629e-16
Chst8	2440.2	0.959154	8.66944	4.34247e-18	2.89552e-16
Slc40a1	192.362	-0.787896	-8.66465	4.52915e-18	3.0107e-16
Vangl1	825.4	-0.600927	-8.65227	5.04833e-18	3.3353e-16
Asb4	3824.09	0.529919	8.64804	5.2393e-18	3.45091e-16
Aldh1b1	262.511	-0.707285	-8.64582	5.3422e-18	3.50799e-16
Ihh	81.1029	-1.50397	-8.64392	5.43173e-18	3.5536e-16
Gbp11	72.8985	-1.04853	-8.64365	5.44456e-18	3.5536e-16
Slc45a3	218.098	-1.16388	-8.64046	5.59861e-18	3.64314e-16
Serpinb6a	2447.69	-0.347967	-8.62567	6.37157e-18	4.13368e-16
Pvrl4	247.621	-0.480296	-8.62432	6.44719e-18	4.17021e-16
Galnt3	266.334	1.08627	8.60516	7.62122e-18	4.90026e-16
Jam3	1754.34	-0.688363	-8.59725	8.16506e-18	5.23436e-16
Smurf1	1266.32	-0.532614	-8.58155	9.36067e-18	5.98307e-16
Megf10	250.194	-1.38255	-8.58118	9.39079e-18	5.98462e-16
Soga1	1482.66	0.640511	8.57223	1.01504e-17	6.44967e-16
Fras1	541.906	0.644552	8.56893	1.04449e-17	6.61376e-16
Gm15816	62.5466	1.07748	8.56866	1.04698e-17	6.61376e-16
Loxhd1	681.229	-1.50065	-8.56442	1.0862e-17	6.84151e-16
Serpina7	66.4377	-1.26331	-8.56277	1.10189e-17	6.92011e-16
Ntrk3	1716.18	-0.65623	-8.55078	1.22257e-17	7.65578e-16
Tmem132b	1216.88	-0.775813	-8.5482	1.25018e-17	7.80603e-16
Hdc	404.43	-0.708722	-8.54159	1.32391e-17	8.24256e-16
Id2	1015.32	0.72368	8.54113	1.32913e-17	8.25131e-16
Ptges	1109.64	-0.541188	-8.53708	1.37651e-17	8.52092e-16
Nfic	3201.25	0.486765	8.51869	1.61364e-17	9.93195e-16
Lrp1b	463.381	0.595661	8.51634	1.64671e-17	1.01067e-15
Lars2	11761	0.987358	8.50254	1.85479e-17	1.13515e-15
Scrt1	1246.14	0.45312	8.4969	1.94727e-17	1.18838e-15
Tmem52	276.23	-0.967201	-8.49585	1.96488e-17	1.19575e-15
Fam189a1	585.046	-0.69703	-8.48802	2.10185e-17	1.27551e-15
Sfxn2	776.541	-0.427223	-8.48435	2.16919e-17	1.31269e-15
Sox11	474.872	-0.615239	-8.4735	2.3813e-17	1.43703e-15
Eef1a2	4250.79	0.660441	8.45884	2.70039e-17	1.62054e-15
2410006H16Rik	1029.63	0.414621	8.45295	2.84023e-17	1.69973e-15
Insl6	43.159	-1.09398	-8.44917	2.93384e-17	1.7509e-15
Il13ra1	931.78	-0.434942	-8.44569	3.0225e-17	1.79884e-15
Fam169b	157.642	-0.813344	-8.44463	3.05009e-17	1.81028e-15
Ceacam2	238.625	-1.14812	-8.43635	3.274e-17	1.92729e-15
Kcnk12	278.18	0.908313	8.42487	3.61141e-17	2.12014e-15
2019-03-02	1431.8	-0.364222	-8.41843	3.81549e-17	2.22784e-15
Synm	307.828	0.717811	8.41641	3.88208e-17	2.26061e-15
BC049966	59.8563	-0.874873	-8.41246	4.01496e-17	2.32545e-15
Ldb2	558.622	0.602746	8.40196	4.39097e-17	2.53643e-15
Matk	540.431	-0.577023	-8.39879	4.51111e-17	2.59888e-15
Pira6	69.817	-1.01891	-8.39594	4.62189e-17	2.65562e-15
Myo15	4580.31	-0.687319	-8.39393	4.7014e-17	2.69414e-15
Trpc4	80.3516	-0.774003	-8.37973	5.30485e-17	3.03005e-15
Arhgef19	757.505	0.723788	8.37949	5.31562e-17	3.03005e-15
Galnt4	147.879	-0.648852	-8.36587	5.96705e-17	3.39242e-15
Atp2b4	2958.84	-0.541715	-8.35555	6.51261e-17	3.68772e-15
Kank2	414.554	0.573759	8.35541	6.52059e-17	3.68772e-15
Kcna4	122.579	-1.21573	-8.35148	6.74133e-17	3.8026e-15
Ccdc82	1461.54	-0.416493	-8.34553	7.08963e-17	3.98865e-15
Galr3	95.1083	1.18869	8.34509	7.11605e-17	3.99312e-15
Kcnab1	269.12	-0.542171	-8.33419	7.80299e-17	4.36725e-15
AK030468	173.788	0.679127	8.3267	8.31285e-17	4.64059e-15
Dlc1	717.436	0.437283	8.3243	8.48293e-17	4.72333e-15
Rybp	2222.93	0.665809	8.32392	8.51005e-17	4.72625e-15
Nrep	2016.36	0.66654	8.32329	8.55547e-17	4.73929e-15
Mtmr12	727.001	-0.345654	-8.31984	8.80835e-17	4.8669e-15
Tekt2	809.663	-0.473534	-8.30076	1.03448e-16	5.70127e-15
AK045624	746.538	0.508093	8.29293	1.10494e-16	6.07405e-15
2610316D01Rik	47.4712	1.14185	8.27981	1.2337e-16	6.74684e-15
Stbd1	437.142	0.9808	8.27977	1.23411e-16	6.74684e-15
Ddx3x	9129.06	0.392383	8.27952	1.23669e-16	6.74684e-15
Slc17a6	770.232	0.94575	8.24203	1.69317e-16	9.19078e-15
Zfp862-ps	1070.71	0.327291	8.23953	1.72895e-16	9.36149e-15
Vti1a	768.523	-0.331424	-8.22692	1.92086e-16	1.0323e-14
Clip4	841.912	-0.413291	-8.22644	1.92861e-16	1.03389e-14
Ppp2r2b	988.436	0.450136	8.22591	1.93719e-16	1.03592e-14
Cacna1c	1267.94	0.652463	8.22276	1.98866e-16	1.06082e-14
Pla2g2d	80.5379	-1.13202	-8.21003	2.21136e-16	1.1767e-14
Lhfpl3	445.2	0.829781	8.20906	2.22926e-16	1.18332e-14
Nqo1	869.464	-0.76227	-8.20325	2.33982e-16	1.23896e-14
Lnx1	744.131	-0.395951	-8.19604	2.48431e-16	1.31225e-14
Gnmt	663.187	-0.709809	-8.19467	2.51279e-16	1.32406e-14
Dok7	109.895	1.2764	8.19373	2.53262e-16	1.33126e-14
Plekha1	2447.6	-0.342748	-8.16973	3.09086e-16	1.62075e-14
Tle6	170.114	-0.609954	-8.1684	3.12517e-16	1.63477e-14
Rab3b	3729.65	-0.625498	-8.16747	3.14927e-16	1.6434e-14
Lcorl	468.318	0.806226	8.16712	3.15827e-16	1.64413e-14
Cldn6	445.825	-0.420458	-8.15972	3.35798e-16	1.74389e-14
Trim16	426.889	0.827692	8.14584	3.7667e-16	1.95146e-14
Fam124a	997.247	0.440358	8.13015	4.28762e-16	2.21602e-14
C3	420.193	0.895244	8.11892	4.70353e-16	2.42518e-14
Lhfpl5	616.067	-0.58823	-8.11182	4.9869e-16	2.56517e-14
Flrt1	556.122	1.21388	8.09477	5.73718e-16	2.93711e-14
Tfcp2l1	300.679	-0.543209	-8.09163	5.88731e-16	3.00684e-14
Gsdma	146.63	-1.0816	-8.08929	6.00152e-16	3.05794e-14
Usp51	239.646	-0.602049	-8.07206	6.91191e-16	3.51353e-14
Apobec1	987.517	-0.543303	-8.07041	7.00628e-16	3.55314e-14
4833422C13Rik	104.7	-0.812399	-8.06873	7.10344e-16	3.57753e-14
Crispld2	1400.01	-0.550391	-8.06872	7.10406e-16	3.57753e-14
Pde7b	918.791	0.929678	8.05705	7.81569e-16	3.92675e-14
Cryz	637.134	0.811506	8.04175	8.85645e-16	4.42905e-14
1700019N19Rik	40.1789	1.38775	8.01371	1.113e-15	5.54038e-14
Stk33	682.363	-0.439008	-8.01084	1.13929e-15	5.65819e-14
Slc27a2	457.76	-0.523044	-7.99893	1.25505e-15	6.20461e-14
Tspan12	1052.56	-0.484674	-7.99778	1.26683e-15	6.24856e-14
Fndc9	138.288	1.53122	7.98957	1.35413e-15	6.66393e-14
AK135406	438.227	-0.4582	-7.98863	1.36446e-15	6.69949e-14
Serpine2	1970.93	-1.11631	-7.98107	1.45065e-15	7.10655e-14
Acy1	726.367	-0.402871	-7.97608	1.51048e-15	7.36625e-14
Igf1r	3128.09	0.405902	7.97566	1.51569e-15	7.37497e-14
Slc5a8	352.555	0.720802	7.9698	1.58928e-15	7.71571e-14
Nuak1	454.382	0.623115	7.96591	1.64019e-15	7.94498e-14
Lax1	58.9833	-0.853522	-7.9643	1.66161e-15	8.03076e-14
Cast	1108.89	-0.330734	-7.96073	1.71021e-15	8.24719e-14
Znrf2	487.354	0.415945	7.95627	1.773e-15	8.52057e-14
Serpine1	250.977	1.01873	7.9559	1.77833e-15	8.52057e-14
Tango2	806.108	-0.410671	-7.95542	1.78527e-15	8.53296e-14
Nrip1	565.213	0.723563	7.94858	1.8866e-15	8.9974e-14
Fam189a2	462.904	0.738555	7.94624	1.92259e-15	9.14884e-14
Plxdc2	474.394	-0.557189	-7.92826	2.22229e-15	1.04826e-13
Dennd2a	1009.96	0.60296	7.9199	2.3771e-15	1.11641e-13
Btbd19	418.112	0.460662	7.90235	2.73695e-15	1.28263e-13
9530026P05Rik	149.674	-0.758514	-7.89109	2.99556e-15	1.39775e-13
Uba7	1128.4	-0.584204	-7.88847	3.05908e-15	1.42432e-13
Tnr	688.162	-0.713348	-7.88453	3.15731e-15	1.46669e-13
BC034090_	1765.92	0.389348	7.8837	3.17829e-15	1.47031e-13
4930579G24Rik	169.862	0.665474	7.87778	3.33261e-15	1.53841e-13
Fam46c	674.976	-0.672394	-7.87702	3.35284e-15	1.54445e-13
Abcc8	432.478	-0.753728	-7.876	3.38019e-15	1.55374e-13
Steap2	610.015	-0.899846	-7.8722	3.48468e-15	1.59837e-13
Ckap4	976.709	0.59106	7.86058	3.82365e-15	1.74643e-13
Acsl6	903.723	-0.541599	-7.85505	3.99604e-15	1.82132e-13
Mmp23	165.776	0.706237	7.84883	4.19928e-15	1.90591e-13
Calml4	199.534	0.899881	7.84348	4.38217e-15	1.98475e-13
Chac2	170.09	-0.513274	-7.82444	5.09935e-15	2.30474e-13
AI118078	1244.42	0.918716	7.82365	5.13114e-15	2.31426e-13
Il1r1	635.329	-0.763953	-7.81833	5.35267e-15	2.40915e-13
Cchcr1	479.414	-0.445522	-7.81568	5.46689e-15	2.45544e-13
Tmie	755.751	-0.452438	-7.78888	6.76072e-15	3.00532e-13
Vill	245.284	-0.559732	-7.78851	6.78052e-15	3.00793e-13
Ptprg	2128.45	-0.393166	-7.78156	7.16385e-15	3.17147e-13
Hepacam2	3365.46	0.489525	7.77667	7.44581e-15	3.28955e-13
Sncaip	271.497	0.770299	7.76486	8.17356e-15	3.58906e-13
Gria4	942.64	-0.73287	-7.76217	8.34863e-15	3.65109e-13
Fshb	17205.2	-1.39644	-7.75953	8.52419e-15	3.72033e-13
Ppl	1703.82	-0.535334	-7.75447	8.87149e-15	3.86411e-13
Mrap2	449.873	-0.581931	-7.75302	8.9729e-15	3.90041e-13
1810011O10Rik	403.012	0.414609	7.73912	1.00105e-14	4.3427e-13
Pabpc1	3778.68	0.378863	7.73301	1.05033e-14	4.54735e-13
Lrrc16a	844.394	-0.435091	-7.73027	1.07317e-14	4.63694e-13
Slc41a3	401.077	-0.695264	-7.7297	1.07802e-14	4.64862e-13
Dclk1	6485.75	0.653085	7.7285	1.08824e-14	4.68333e-13
Dock4	1252.3	0.416974	7.72814	1.09125e-14	4.68696e-13
Pvrl2	912.005	-0.438396	-7.72662	1.1044e-14	4.73402e-13
St7	404.024	0.389218	7.72396	1.12771e-14	4.82435e-13
P4ha2	1702.37	-0.509521	-7.7142	1.21739e-14	5.19774e-13
Mill2	116.645	-0.747038	-7.70699	1.28823e-14	5.48932e-13
Mical1	230.928	-0.504973	-7.69671	1.39617e-14	5.93757e-13
Inhbb	787.929	-0.492351	-7.68959	1.47607e-14	6.25276e-13
Whrn	2308.42	-0.447363	-7.68244	1.5609e-14	6.59914e-13
Lemd1	101.48	-0.752611	-7.67605	1.6407e-14	6.9095e-13
Zdhhc18	532.458	0.333077	7.67521	1.65143e-14	6.94115e-13
Dcaf4	384.397	-0.331653	-7.67374	1.67054e-14	7.00782e-13
Olfm3	931.61	0.934099	7.66705	1.75994e-14	7.36855e-13
Ski	2212.07	0.337844	7.6643	1.79813e-14	7.51389e-13
Nphp3	407.218	-0.371199	-7.65353	1.95538e-14	8.13949e-13
Larp1	3144.66	0.443551	7.64569	2.07828e-14	8.61786e-13
Fry	1281.46	0.408726	7.64072	2.1601e-14	8.93998e-13
Klhl21	1239.43	0.370402	7.63985	2.17483e-14	8.98373e-13
Ptpn5	372.935	0.848437	7.63657	2.23089e-14	9.18024e-13
Mettl24	114.356	0.829485	7.63463	2.26466e-14	9.30146e-13
Pde8b	473.422	-0.672235	-7.62613	2.41913e-14	9.91706e-13
Pigz	256.853	0.7161	7.62553	2.43038e-14	9.94429e-13
Hcrtr1	93.4818	-0.938265	-7.62504	2.4395e-14	9.96276e-13
Prr15	252.21	-0.682069	-7.62342	2.4705e-14	1.00703e-12
AI506816	1204.39	0.960608	7.62203	2.49726e-14	1.01602e-12
Begain	678.014	-0.585248	-7.62087	2.51975e-14	1.02325e-12
C2cd4c	143.584	1.06209	7.61734	2.58954e-14	1.04961e-12
Msrb2	711.997	0.480563	7.60486	2.8522e-14	1.15391e-12
Slc35f4	133.266	0.929978	7.5952	3.07309e-14	1.23864e-12
Sstr5	442.238	-0.746573	-7.5883	3.24123e-14	1.29914e-12
AK029023	77.8474	-0.995111	-7.58659	3.28429e-14	1.31396e-12
Wfdc1	417.382	-0.615972	-7.5808	3.43438e-14	1.37147e-12
Ugt8a	248.308	-0.747461	-7.57916	3.47793e-14	1.38629e-12
Manea	666.295	-0.37805	-7.5772	3.53103e-14	1.40487e-12
Gm2694	154.559	-0.686963	-7.57423	3.61268e-14	1.43471e-12
Abca4	1186.65	0.607249	7.56687	3.8233e-14	1.51557e-12
Tmc3	338.811	-0.749203	-7.56468	3.88829e-14	1.53851e-12
Lsamp	339.274	0.737416	7.56191	3.97187e-14	1.56871e-12
Fetub	760.399	-0.586256	-7.56164	3.98027e-14	1.56915e-12
P3h3	2061.03	0.32775	7.55866	4.07232e-14	1.60252e-12
Jph3	532.654	0.671917	7.55775	4.10091e-14	1.61084e-12
Diras1	653.216	0.478375	7.54287	4.59734e-14	1.79929e-12
Arhgap10	331.832	-0.381855	-7.54075	4.67291e-14	1.82556e-12
Mgat4c	146.077	-0.775722	-7.53796	4.77373e-14	1.86158e-12
4833415N18Rik	23.3111	-1.0865	-7.53594	4.84819e-14	1.88721e-12
Slc18b1	413.702	0.373377	7.52948	5.0942e-14	1.979e-12
Stmn1	2080.73	-0.423795	-7.52927	5.10231e-14	1.979e-12
Lpin1	3030.94	-0.571356	-7.52648	5.21281e-14	2.01824e-12
Omg	268.496	0.921248	7.51457	5.71004e-14	2.20679e-12
Ednra	277.856	0.567743	7.51082	5.8757e-14	2.26272e-12
Timp2	4447.93	0.445925	7.51042	5.89389e-14	2.26569e-12
Syt12	146.734	-0.677797	-7.50576	6.10726e-14	2.34354e-12
Fsd1l	1371.76	-0.421572	-7.50307	6.23391e-14	2.3879e-12
F2rl1	355.114	0.40665	7.49606	6.57663e-14	2.51027e-12
Banp	920.84	0.395051	7.49379	6.69111e-14	2.54947e-12
Sat1	1151.18	-0.371503	-7.48552	7.12664e-14	2.70587e-12
Tacc2	1121.91	-0.567225	-7.48425	7.19566e-14	2.72728e-12
Chka	2196.95	-0.344861	-7.48349	7.23746e-14	2.73832e-12
Spaca1	100.721	-0.840626	-7.46815	8.13277e-14	3.06098e-12
Spp1	2871.83	-0.80144	-7.45213	9.18471e-14	3.43893e-12
Cacna1g	628.573	1.43041	7.44525	9.6759e-14	3.61033e-12
Mypop	819.504	0.349191	7.4359	1.03859e-13	3.86857e-12
Olfm2	202.953	0.783382	7.43352	1.05744e-13	3.93201e-12
Gh	3.72117e+06	-0.927404	-7.43109	1.07704e-13	3.99798e-12
Ppfia2	1283.87	-0.339409	-7.43064	1.08071e-13	4.00476e-12
Tmem139	62.231	-0.909335	-7.42874	1.09633e-13	4.05568e-12
Mroh7	887.56	0.395037	7.41828	1.18652e-13	4.36688e-12
Dbn1	1826.96	0.333097	7.41713	1.19688e-13	4.39752e-12
Anks1b	645.097	-0.76437	-7.41105	1.25303e-13	4.58045e-12
Wnt4	125.395	0.866277	7.40938	1.2689e-13	4.62283e-12
Rnase1	49.6553	1.25677	7.40865	1.27593e-13	4.64062e-12
Tmeff2	297.054	0.795271	7.40451	1.31631e-13	4.77943e-12
Bche	570.937	0.589361	7.40231	1.33835e-13	4.85131e-12
Cyb561	2996.06	-0.329462	-7.39428	1.42178e-13	5.14508e-12
Epha1	385.126	-0.847962	-7.39168	1.4498e-13	5.23769e-12
Myc	471.812	1.21467	7.3882	1.48827e-13	5.36773e-12
Rbp4	490.513	-0.871378	-7.36674	1.74845e-13	6.27467e-12
Nxpe4	274.45	-0.579987	-7.36405	1.78411e-13	6.39204e-12
Itpr1	4399.52	-0.334476	-7.34894	1.99785e-13	7.12238e-12
Dab2ip	3366.93	0.555615	7.33767	2.17343e-13	7.73097e-12
Ccdc141	1048.45	0.684049	7.33753	2.17572e-13	7.73097e-12
Pid1	808.973	-0.476786	-7.33681	2.18744e-13	7.75983e-12
Gabra4	579.852	-0.675492	-7.33014	2.29913e-13	8.12938e-12
Etnk2	318.399	1.31073	7.3269	2.35533e-13	8.31446e-12
Rxrg	1402.48	-0.570657	-7.32488	2.39115e-13	8.42714e-12
Sytl2	75.799	-1.12041	-7.31735	2.52919e-13	8.87022e-12
Rab11fip2	1013.16	0.391641	7.3153	2.56814e-13	8.99224e-12
P2ry1	93.4977	0.632538	7.31239	2.62435e-13	9.1742e-12
Efr3b	880.501	0.669575	7.29813	2.91799e-13	1.01678e-11
Tenm2	370.736	0.771878	7.27982	3.34257e-13	1.15912e-11
Ctdspl	939.007	-0.385394	-7.27495	3.46551e-13	1.1979e-11
AK052594	166.531	-0.530987	-7.25968	3.88011e-13	1.33907e-11
Ccdc67	258.125	-0.573247	-7.25783	3.9336e-13	1.35415e-11
Dpp6	1208.87	-0.489569	-7.25773	3.93633e-13	1.35415e-11
Ly6h	7096.13	-0.401479	-7.25217	4.10141e-13	1.40869e-11
Gadd45g	907.089	1.19645	7.25181	4.11227e-13	1.41018e-11
Vdr	382.772	-0.743098	-7.24976	4.17522e-13	1.42798e-11
Prr15l	328.753	-0.688383	-7.24969	4.17739e-13	1.42798e-11
Creb3l1	1216.01	1.35853	7.23659	4.60092e-13	1.56533e-11
Als2cl	951.263	-0.412829	-7.2353	4.645e-13	1.57573e-11
Sstr1	1465.27	0.802779	7.2352	4.64859e-13	1.57573e-11
Anxa4	1613.26	-0.376007	-7.22788	4.90585e-13	1.65862e-11
A930016O22Rik	58.5773	-0.79963	-7.22282	5.09197e-13	1.71886e-11
Ankrd44	747.527	-0.551981	-7.21383	5.44016e-13	1.83067e-11
Gas6	2966.33	0.55483	7.20987	5.60044e-13	1.88168e-11
Itpk1	921.906	0.592168	7.20617	5.75483e-13	1.93055e-11
Eogt	1023.82	-0.444434	-7.20591	5.76577e-13	1.93122e-11
Ptpn13	1433.76	-0.362134	-7.20547	5.78438e-13	1.93445e-11
Stard4	392.772	-0.446315	-7.20113	5.97136e-13	1.9939e-11
AK046721	103.267	0.811209	7.19987	6.02704e-13	2.00939e-11
AK007238	11.3777	1.37687	7.19236	6.36824e-13	2.11987e-11
Colec11	27.7342	-0.980379	-7.17449	7.25775e-13	2.40117e-11
Rtn1	2129.58	0.374131	7.17124	7.43208e-13	2.45134e-11
Lmna	2952.6	0.45884	7.16378	7.84811e-13	2.58068e-11
Ctsz	3584.78	-0.361769	-7.16286	7.90131e-13	2.59422e-11
Uchl1os	59.1526	-0.742304	-7.15884	8.13608e-13	2.66321e-11
Plin3	854.479	-0.39683	-7.15584	8.31633e-13	2.71476e-11
Appl2	2446.02	-0.38175	-7.15504	8.36456e-13	2.72561e-11
Gm19461	107.246	-0.643338	-7.13948	9.36844e-13	3.03897e-11
Gjd2	237.136	0.620386	7.13881	9.41397e-13	3.04917e-11
Lamb3	526.106	0.851831	7.13497	9.68108e-13	3.13046e-11
Ceacam1	483.749	-0.751028	-7.13478	9.69392e-13	3.13046e-11
Tuft1	697.768	-0.448505	-7.13364	9.77507e-13	3.15195e-11
Nrxn3	316.849	0.932342	7.13083	9.97676e-13	3.21219e-11
Tcf19	286.189	-0.471737	-7.12526	1.03885e-12	3.33977e-11
Cep170b	3346.49	0.343366	7.11102	1.15189e-12	3.69219e-11
Sntb1	564.702	-0.615079	-7.10735	1.18292e-12	3.78043e-11
C130026L21Rik	57.1785	1.42801	7.10613	1.19338e-12	3.80264e-11
Lonrf3	223.009	-0.638419	-7.10403	1.21167e-12	3.84953e-11
Prl	3.34584e+06	1.29133	7.10371	1.21448e-12	3.85282e-11
Cdca7l	101.15	-0.582614	-7.1009	1.23949e-12	3.92062e-11
Arhgef16	491.285	-0.462113	-7.09684	1.27645e-12	4.02575e-11
Aldh1l1	340.941	-0.961703	-7.08489	1.39158e-12	4.37608e-11
Gabrb1	267.87	-0.497252	-7.07867	1.45539e-12	4.56347e-11
Rims4	94.8764	0.949214	7.06254	1.63487e-12	5.11881e-11
Syn2	797.047	0.654548	7.0608	1.65543e-12	5.17569e-11
Osbpl6	1240.76	-0.430636	-7.05911	1.67577e-12	5.2317e-11
Gm5124	387.964	0.436049	7.03567	1.98312e-12	6.15565e-11
Cfap74	592.888	-0.402374	-7.01752	2.25839e-12	6.97003e-11
Slc10a4	478.076	-0.629324	-7.01731	2.26173e-12	6.97037e-11
Htatsf1	9061.25	-0.484387	-7.00864	2.40644e-12	7.3743e-11
Nipal2	1307.19	0.361505	7.00262	2.5122e-12	7.6766e-11
Morc4	1122.99	-0.48898	-6.98346	2.87997e-12	8.72634e-11
Eif4ebp1	262.668	-0.770049	-6.97889	2.97528e-12	8.9922e-11
1700021N21Rik	41.8276	-0.882638	-6.97509	3.05683e-12	9.21056e-11
Car10	1055.38	-0.592385	-6.96916	3.18831e-12	9.58445e-11
Dnaic2	145.518	-0.969937	-6.9689	3.19423e-12	9.58445e-11
Rnf149	700.966	-0.322268	-6.96629	3.25412e-12	9.73713e-11
Ctxn3	1112.45	-0.505498	-6.96441	3.29788e-12	9.85442e-11
Il17rb	44.5695	-1.02585	-6.95961	3.41205e-12	1.01534e-10
Nmral1	466.718	-0.522751	-6.95161	3.61131e-12	1.07169e-10
Rnd2	346.352	0.710189	6.9444	3.80081e-12	1.12483e-10
Rora	1264.95	-0.388904	-6.94259	3.84986e-12	1.13779e-10
Mpp2	1766.21	0.35215	6.942	3.8658e-12	1.14094e-10
Nkain2	74.7557	0.901058	6.93829	3.96878e-12	1.16973e-10
Uaca	2086.89	-0.330658	-6.937	4.0051e-12	1.17883e-10
Bnip3	1731.37	-0.422811	-6.93473	4.06992e-12	1.19628e-10
Pamr1	192.407	0.779111	6.93362	4.10193e-12	1.20405e-10
Fads1	4286.75	-0.384664	-6.93153	4.16306e-12	1.22034e-10
2310081J21Rik	76.6188	1.04405	6.9302	4.20235e-12	1.22855e-10
Smoc1	480.781	0.682331	6.9302	4.20245e-12	1.22855e-10
Ptprm	694.951	0.443815	6.92906	4.23661e-12	1.23686e-10
Hecw2	485.418	-0.438809	-6.92844	4.25505e-12	1.24057e-10
Pgbd5	735.788	0.469824	6.92584	4.33387e-12	1.26015e-10
Dpep1	322.362	-0.688237	-6.92373	4.39898e-12	1.27736e-10
Fut1	117.735	-0.892691	-6.91099	4.81272e-12	1.39189e-10
Gramd2	226.198	-0.525818	-6.90262	5.10536e-12	1.47258e-10
Cdc14a	538.721	-0.473555	-6.90214	5.12257e-12	1.47557e-10
Prodh	437.94	-0.714517	-6.89877	5.24548e-12	1.50704e-10
Fbxo31	1416.49	0.491951	6.89876	5.24577e-12	1.50704e-10
Man1a	276.422	0.712419	6.87933	6.01351e-12	1.72531e-10
B430212C06Rik	94.4418	-0.863133	-6.87421	6.23324e-12	1.78598e-10
Tac1	21.1141	-1.26898	-6.87205	6.32861e-12	1.8109e-10
Slc35f3	194.805	-0.416869	-6.8679	6.51517e-12	1.85691e-10
Clip2	1037.23	0.359855	6.86567	6.61781e-12	1.8812e-10
Slc35g1	388.376	-0.390352	-6.86368	6.71083e-12	1.90514e-10
Gnal	608.541	0.361616	6.86038	6.86758e-12	1.94708e-10
Fut2	392.924	-0.744314	-6.8558	7.09131e-12	2.00524e-10
Ank1	748.802	1.00832	6.85163	7.3015e-12	2.06198e-10
Mthfd2	1000.86	-0.517913	-6.84118	7.85439e-12	2.21523e-10
Ptpru	709.064	0.483054	6.83748	8.05969e-12	2.26426e-10
Rab30	422.265	-0.827319	-6.83451	8.22882e-12	2.30578e-10
Glt28d2	261.011	-0.400986	-6.83335	8.29543e-12	2.32143e-10
St6galnac4	555.753	0.390712	6.82715	8.6617e-12	2.42079e-10
Shc3	34.6503	0.822713	6.8109	9.69882e-12	2.6967e-10
Csrnp3	1147.34	0.561942	6.79992	1.04681e-11	2.90684e-10
Myo7a	1072.29	-0.435317	-6.7887	1.13147e-11	3.12588e-10
Dcn	3298.31	-0.375035	-6.7873	1.14249e-11	3.15229e-10
Shank2	563.788	0.410159	6.78585	1.15408e-11	3.17616e-10
Mr1	930.46	-0.437787	-6.77889	1.21106e-11	3.32871e-10
Tiam1	1821.08	0.442504	6.77183	1.27159e-11	3.49066e-10
Tnc	103.622	0.663298	6.76894	1.29729e-11	3.55668e-10
Prkca	1385.16	-0.439581	-6.76762	1.30914e-11	3.58463e-10
2019-03-03	178.937	-0.555152	-6.76607	1.32331e-11	3.61426e-10
Fdxr	268.166	-0.367014	-6.76169	1.36391e-11	3.72043e-10
AI429214	214.104	0.501192	6.76003	1.3796e-11	3.7585e-10
Skap2	294.184	-0.513754	-6.75806	1.39856e-11	3.80056e-10
Mgll	1088.14	-0.740146	-6.75169	1.46129e-11	3.96106e-10
Eno3	1751.28	-0.691683	-6.75141	1.46414e-11	3.96381e-10
Lrfn3	425.914	0.538632	6.74726	1.50664e-11	4.07377e-10
Arhgap29	1502.87	0.504118	6.74577	1.5222e-11	4.10863e-10
Alg13	411.329	0.422908	6.74566	1.52333e-11	4.10863e-10
Emilin1	616.88	0.679733	6.73673	1.61986e-11	4.36353e-10
Chrdl1	482.254	-0.796817	-6.73488	1.64068e-11	4.41411e-10
Ahdc1	1594.76	0.44873	6.73058	1.68987e-11	4.54079e-10
AK162363	181.145	-0.6502	-6.72005	1.8166e-11	4.87526e-10
Stac2	340.258	-0.977857	-6.71879	1.83246e-11	4.91171e-10
Ntm	237.943	1.00288	6.71583	1.86996e-11	4.99982e-10
2610528J11Rik	76.4012	-0.602988	-6.71509	1.87954e-11	5.01922e-10
Rap1gds1	1316.77	0.424745	6.70069	2.07431e-11	5.52569e-10
Ankrd55	122.766	0.914176	6.70003	2.08372e-11	5.54392e-10
Kcnk9	198.519	-0.845734	-6.69642	2.13591e-11	5.67579e-10
Pcolce2	186.565	-0.861388	-6.69472	2.16083e-11	5.73496e-10
Slco4a1	250.87	-0.716327	-6.694	2.17158e-11	5.75641e-10
Tmem35	877.528	-0.426748	-6.69375	2.17517e-11	5.75887e-10
Actn1	1290.86	-0.352243	-6.68914	2.24494e-11	5.9363e-10
Tnik	1292.47	-0.464296	-6.68625	2.28966e-11	6.04715e-10
Apbb1	5328.89	0.367782	6.6831	2.33945e-11	6.17113e-10
Serpinb6b	66.8961	-0.587386	-6.6797	2.39427e-11	6.30802e-10
4930447M23Rik	219.397	0.776882	6.67143	2.53327e-11	6.6661e-10
Gpr139	23.9275	-1.23766	-6.67034	2.55212e-11	6.70755e-10
Prkcdbp	824.485	0.336245	6.65817	2.77266e-11	7.26066e-10
Cd79b	198.598	-0.733822	-6.65555	2.82244e-11	7.37315e-10
Gstk1	746.895	-0.469417	-6.6538	2.8563e-11	7.45258e-10
Nmrk1	247.084	-0.486158	-6.6519	2.89324e-11	7.53987e-10
Rai2	391.318	0.361998	6.6473	2.98511e-11	7.75125e-10
Rragd	1224.22	-0.44779	-6.64705	2.99021e-11	7.75517e-10
Gata2	893.033	-0.781743	-6.64032	3.13001e-11	8.06929e-10
AK180019	33.4692	0.99789	6.6393	3.15176e-11	8.11569e-10
Tpcn2	396.315	-0.360719	-6.63469	3.25196e-11	8.36373e-10
Racgap1	1839.3	-0.629123	-6.6204	3.58227e-11	9.16743e-10
Syne3	375.188	-0.466893	-6.60912	3.86619e-11	9.85871e-10
Ramp3	113.62	-0.744441	-6.60138	4.07345e-11	1.03169e-09
Ror2	374.674	-0.550458	-6.6011	4.08114e-11	1.03242e-09
Tmem86a	1031.53	0.773726	6.59828	4.15968e-11	1.05106e-09
Phf21b	504.867	0.46335	6.5951	4.24967e-11	1.07254e-09
Ppap2c	362.42	-0.322126	-6.59003	4.39737e-11	1.10595e-09
Gabra2	405.949	0.50813	6.58163	4.65315e-11	1.1662e-09
Il6st	4772.04	0.39027	6.5802	4.69809e-11	1.1761e-09
Amotl2	480.63	0.526683	6.56124	5.33623e-11	1.32969e-09
Lrig1	1977.14	-0.325357	-6.55701	5.48963e-11	1.36476e-09
Ern1	2423.66	0.586046	6.55463	5.57785e-11	1.3851e-09
H2-T10	153.066	-0.446958	-6.5529	5.64288e-11	1.39964e-09
Them6	383.904	0.401312	6.53276	6.45695e-11	1.59606e-09
Wisp1	289.981	-0.964016	-6.52989	6.58189e-11	1.62461e-09
Unc5c	483.277	-0.526205	-6.52976	6.58747e-11	1.62461e-09
Fmnl2	1344.4	-0.438888	-6.51557	7.24163e-11	1.77379e-09
AI197445	116.673	-0.547246	-6.51388	7.32322e-11	1.78972e-09
Tes	912.867	-0.555151	-6.51269	7.38149e-11	1.80192e-09
Slc25a24	767.491	-0.322614	-6.51248	7.39201e-11	1.80245e-09
Arhgef3	870.993	-0.446876	-6.51214	7.40888e-11	1.80453e-09
Nptx1	604.979	-0.700566	-6.5107	7.48008e-11	1.81836e-09
Hpcal4	967.009	0.60124	6.51065	7.48252e-11	1.81836e-09
AK161589	117.678	-0.692782	-6.51034	7.49833e-11	1.82016e-09
1700026D08Rik	41.1281	1.21576	6.5093	7.5504e-11	1.83074e-09
Cryab	667.824	0.459338	6.49508	8.29882e-11	2.00522e-09
Rcor1	500.08	0.343901	6.49493	8.30715e-11	2.00522e-09
Fam46a	7085	0.649306	6.49279	8.4263e-11	2.03172e-09
Aldh1l2	475.452	-0.753103	-6.48612	8.80749e-11	2.12126e-09
Fbln7	137.058	-0.485836	-6.48522	8.85995e-11	2.13152e-09
Magee2	316.284	0.406472	6.47984	9.18208e-11	2.20411e-09
Neurod4	2253.25	1.01446	6.47801	9.29391e-11	2.226e-09
Fbxw7	1030.43	0.46256	6.47174	9.68836e-11	2.31791e-09
4930417O13Rik	73.4254	-0.858893	-6.46966	9.82269e-11	2.34745e-09
Pvrl1	266.958	0.636811	6.46031	1.04492e-10	2.49166e-09
Syt3	559.602	0.499945	6.45181	1.10525e-10	2.62683e-09
Ntn1	582.223	0.755119	6.45159	1.10683e-10	2.62768e-09
Crtac1	661.54	1.13532	6.4482	1.13187e-10	2.68419e-09
Ghrhr	6749.68	-0.647851	-6.44599	1.14851e-10	2.72065e-09
Atg9b	896.535	-0.536254	-6.43307	1.25049e-10	2.94929e-09
Syne2	2806.82	-0.335726	-6.42985	1.27731e-10	3.00273e-09
Otud7a	127.628	0.542356	6.42163	1.34819e-10	3.16246e-09
Plce1	755.491	-0.44678	-6.41894	1.37228e-10	3.212e-09
Stat5b	3006.44	0.438856	6.41835	1.37757e-10	3.22089e-09
Slc19a1	354.661	0.422226	6.41523	1.40612e-10	3.28054e-09
Elovl4	291.859	0.555372	6.41323	1.42468e-10	3.31668e-09
Aebp1	1642.38	1.30139	6.40865	1.46809e-10	3.41406e-09
Gm15408	179.936	0.521288	6.40473	1.50635e-10	3.49926e-09
Glipr2	126.386	-0.669525	-6.39642	1.59065e-10	3.68321e-09
Arsi	40.312	0.73199	6.39407	1.61529e-10	3.73626e-09
Spink8	16.1648	-0.973238	-6.38881	1.67186e-10	3.85885e-09
Phyhip	1612.64	0.512078	6.37671	1.80934e-10	4.16726e-09
Peli2	391.498	-0.379259	-6.37611	1.81638e-10	4.17902e-09
Mapk11	234.458	-0.383311	-6.37444	1.83637e-10	4.22052e-09
Npr2	4746.15	0.431597	6.36105	2.00378e-10	4.59551e-09
Hapln4	449.491	0.969416	6.35992	2.01853e-10	4.62147e-09
6430573F11Rik	141.239	0.823414	6.35867	2.03513e-10	4.65259e-09
Msmo1	1153.73	-0.334698	-6.35765	2.04865e-10	4.67854e-09
Trim12c	309.73	-0.390469	-6.35417	2.0955e-10	4.78049e-09
Nuak2	325.634	-0.446266	-6.35262	2.11683e-10	4.82406e-09
Adk	1069.48	0.361405	6.35179	2.12829e-10	4.84506e-09
Plekhh3	1152.5	0.357281	6.35156	2.13141e-10	4.84706e-09
Atp8a2	148.169	-0.662379	-6.35103	2.13881e-10	4.85875e-09
Egf	971.945	-0.442888	-6.34592	2.21098e-10	5.01743e-09
Col16a1	750.439	0.57031	6.34541	2.21828e-10	5.02871e-09
Necab1	120.715	-1.03987	-6.33669	2.34756e-10	5.29956e-09
Nr3c2	969.308	-0.450632	-6.33597	2.35849e-10	5.31866e-09
Gm7120	571.742	0.732192	6.32648	2.5082e-10	5.64451e-09
Mmp24	265.698	0.435068	6.32344	2.55802e-10	5.73867e-09
Phactr1	1318.4	0.4044	6.31234	2.74844e-10	6.14671e-09
Lair1	132.845	-0.481878	-6.3068	2.84863e-10	6.36421e-09
Lrfn1	289.917	0.454128	6.29472	3.0796e-10	6.85418e-09
Plscr4	581.328	-0.330893	-6.29467	3.08064e-10	6.85418e-09
Rgs17	311.452	0.402826	6.28951	3.1847e-10	7.07842e-09
Nxnl2	47.3885	-0.929218	-6.27874	3.41337e-10	7.57108e-09
Slc52a3	175.521	-0.373405	-6.2773	3.44514e-10	7.63372e-09
9430041J12Rik	97.635	-0.697101	-6.27468	3.50355e-10	7.73934e-09
AK021280	181.236	0.483493	6.27228	3.55798e-10	7.84354e-09
Alox12e	860.39	-0.700238	-6.27133	3.57982e-10	7.88363e-09
Panx1	242.323	0.340608	6.26995	3.61153e-10	7.94538e-09
Gbgt1	124.044	0.862875	6.26427	3.74565e-10	8.20701e-09
Rnf219	549.407	0.364256	6.25859	3.88479e-10	8.49464e-09
Sybu	1439.21	-0.389724	-6.25469	3.98314e-10	8.69209e-09
Cyp4b1	99.1389	-0.911357	-6.24818	4.15254e-10	9.05262e-09
Cntnap4	381.642	-1.04297	-6.24269	4.30113e-10	9.33928e-09
Sh3pxd2b	436.996	0.677773	6.24117	4.3431e-10	9.40164e-09
Alox12	102.553	-0.542303	-6.23924	4.39694e-10	9.50866e-09
Sez6l	165.976	0.874397	6.232	4.6051e-10	9.94886e-09
Arrb2	861.69	0.344248	6.22107	4.93767e-10	1.06248e-08
Nupr1	226.411	-0.562582	-6.21469	5.14251e-10	1.10217e-08
Slc39a5	61.4566	-0.676967	-6.2135	5.18175e-10	1.10948e-08
St6gal2	67.7232	0.817298	6.21302	5.1976e-10	1.11177e-08
Rab19	223.004	-0.504844	-6.21157	5.24571e-10	1.12095e-08
Pus7	647.222	0.344443	6.20714	5.39567e-10	1.15186e-08
Cyp4v3	461.713	-0.387986	-6.20479	5.47706e-10	1.16693e-08
Zmat3	1108.94	0.437924	6.20043	5.63088e-10	1.19852e-08
AK038632	578.779	-0.407137	-6.19983	5.65243e-10	1.20074e-08
AK036396	97.6875	0.683928	6.19824	5.70972e-10	1.21125e-08
Tmem123	2213.84	-0.344309	-6.19815	5.71311e-10	1.21125e-08
Col11a1	1197.28	0.435509	6.18606	6.16846e-10	1.30013e-08
Neu2	50.5174	0.823306	6.1855	6.19046e-10	1.30294e-08
Itpr3	878.006	-0.69376	-6.18122	6.36074e-10	1.33156e-08
Sult5a1	136.841	-0.89553	-6.17461	6.63274e-10	1.38716e-08
Dhx58	172.583	-0.440323	-6.17216	6.7365e-10	1.4075e-08
Hmgcs1	1819.5	-0.362148	-6.17136	6.77056e-10	1.41093e-08
Mx2	86.9179	-0.571481	-6.17125	6.77505e-10	1.41093e-08
Serpinh1	3600.36	0.402113	6.17122	6.77644e-10	1.41093e-08
Klhl31	157.169	0.587361	6.17116	6.77906e-10	1.41093e-08
Fam179a	462.96	-0.4633	-6.16415	7.08647e-10	1.46784e-08
Lamc3	286.93	-0.540527	-6.16005	7.2724e-10	1.50491e-08
Pcbp1	5451.83	0.341964	6.1572	7.40424e-10	1.53073e-08
Cd276	513.483	0.360645	6.14707	7.89256e-10	1.63012e-08
Lad1	67.1862	0.615614	6.1443	8.03171e-10	1.65728e-08
Itga6	474.057	0.35828	6.13623	8.45053e-10	1.73541e-08
Dagla	795.866	-0.371128	-6.12948	8.81678e-10	1.80377e-08
Mchr1	157.492	-0.798327	-6.1233	9.16582e-10	1.86986e-08
Sgtb	297.287	-0.37068	-6.11903	9.41475e-10	1.91702e-08
Prelp	1831.61	0.458771	6.10891	1.00313e-09	2.03873e-08
S100a9	85.9911	-1.24556	-6.1081	1.00823e-09	2.04715e-08
Dach1	854.413	0.39112	6.10772	1.01062e-09	2.05009e-08
Spock1	239.017	-0.767128	-6.1055	1.02482e-09	2.07499e-08
Slco2a1	114.376	0.791101	6.09819	1.07274e-09	2.16796e-08
Pkp2	647.193	-0.334432	-6.0939	1.10196e-09	2.22285e-08
Nfix	3058.88	0.506065	6.09069	1.12429e-09	2.26577e-08
Foxn2	362.195	0.414377	6.08043	1.19862e-09	2.40436e-08
Stab2	474.034	-0.671937	-6.07492	1.24047e-09	2.48151e-08
Hspb8	617.547	0.800349	6.07492	1.24052e-09	2.48151e-08
Kcnj11	329.748	-0.552012	-6.07269	1.25782e-09	2.50914e-08
Rrs1	597.985	0.404466	6.0718	1.26482e-09	2.52077e-08
Rps26	3280.95	0.430465	6.07128	1.26896e-09	2.52436e-08
Pcdhga11	188.713	0.409503	6.07111	1.27028e-09	2.52467e-08
Grb10	1559.5	-0.525932	-6.06877	1.28892e-09	2.55612e-08
Colec12	705.148	-0.368157	-6.06866	1.28983e-09	2.55612e-08
2810032G03Rik	54.021	-0.536989	-6.06683	1.30458e-09	2.58097e-08
Musk	63.0833	-0.866175	-6.06667	1.30586e-09	2.58114e-08
Kcnmb4os2	219.922	-0.73632	-6.06421	1.32604e-09	2.61623e-08
Ptprj	1254.03	-0.38462	-6.05937	1.36655e-09	2.68878e-08
Galc	538.734	0.333991	6.05563	1.39869e-09	2.74952e-08
Alpk1	400.462	-0.402565	-6.05082	1.4411e-09	2.82775e-08
AK030357	180.89	-0.39469	-6.04731	1.47281e-09	2.88473e-08
Vegfc	356.902	-0.499339	-6.04594	1.4854e-09	2.90675e-08
Tmem211	191.992	-0.394251	-6.04534	1.49098e-09	2.9132e-08
AF529169	172.535	0.646433	6.04529	1.49139e-09	2.9132e-08
AK086355	71.0602	0.711175	6.04126	1.52914e-09	2.98154e-08
Esrp2	135.678	-0.493691	-6.03802	1.56016e-09	3.03929e-08
Lhpp	300.688	-0.364635	-6.03157	1.62375e-09	3.16032e-08
Hunk	575.771	0.416519	6.02691	1.67119e-09	3.24389e-08
Cpxm1	311.29	-0.428318	-6.02532	1.68778e-09	3.27313e-08
Liph	80.3332	-1.04347	-6.02185	1.72433e-09	3.34102e-08
Rtl1	632.566	-0.569111	-6.01768	1.76934e-09	3.4221e-08
Pcolce	955.278	-0.494585	-6.00202	1.94876e-09	3.75231e-08
Taf4b	104.993	0.458133	6.0009	1.9623e-09	3.77503e-08
Evl	560.205	0.399857	5.99582	2.02456e-09	3.88787e-08
AK136601	23.3367	-0.977377	-5.99144	2.07994e-09	3.9836e-08
Bspry	382.209	-0.340008	-5.98493	2.16481e-09	4.14247e-08
Igsf9	720.158	-0.418901	-5.97783	2.26127e-09	4.31558e-08
Ccdc86	423.411	0.444845	5.97758	2.26471e-09	4.31834e-08
Slc24a2	1742.94	-0.410723	-5.9769	2.2742e-09	4.33261e-08
Prr16	528.256	0.454553	5.97603	2.28641e-09	4.3482e-08
Sertad4	537.007	-0.43201	-5.9651	2.44488e-09	4.64548e-08
Prkar2b	1147.14	-0.517922	-5.96166	2.49684e-09	4.73589e-08
Rad51c	251.358	0.329679	5.96005	2.52162e-09	4.77869e-08
Scnn1b	1068.1	-0.658103	-5.95661	2.57529e-09	4.87612e-08
Tmem106a	463.128	-0.331418	-5.95371	2.62126e-09	4.94639e-08
Mesdc1	720.186	1.04402	5.95021	2.67799e-09	5.04846e-08
Prkcb	1162.34	-0.439488	-5.94886	2.70018e-09	5.08585e-08
Rplp1	13160.8	0.357651	5.93926	2.86306e-09	5.34141e-08
Nop56	3669.64	0.589514	5.93461	2.94554e-09	5.49054e-08
Cyfip2	7214.42	0.663384	5.9327	2.98002e-09	5.55003e-08
Zhx2	1155.43	0.332558	5.93216	2.98967e-09	5.5632e-08
Cmbl	1003.38	-0.337965	-5.93201	2.99256e-09	5.56378e-08
Ubqln2	4172.56	0.387644	5.92916	3.04483e-09	5.64639e-08
Kcnt1	1844.96	0.340424	5.92474	3.12797e-09	5.78567e-08
Cpne4	284.03	0.651465	5.92394	3.14323e-09	5.80892e-08
Plekhb1	4131.44	-0.34724	-5.91507	3.31729e-09	6.11491e-08
Lypd1	67.2044	-0.732285	-5.90498	3.52691e-09	6.47173e-08
Myo1h	176.96	-0.526143	-5.90489	3.52883e-09	6.47173e-08
Pla2g7	1508.31	0.334887	5.8898	3.86664e-09	7.05532e-08
Grb14	217.982	0.483147	5.88928	3.87883e-09	7.07159e-08
Ngfr	147.566	0.837448	5.88804	3.9081e-09	7.10398e-08
Tunar	104.362	-0.825362	-5.88792	3.91088e-09	7.10398e-08
Zcchc3	488.151	0.337336	5.88472	3.98724e-09	7.2326e-08
St6galnac3	76.1956	-0.601263	-5.88272	4.03568e-09	7.30821e-08
Gria2	2466.28	0.404661	5.87817	4.14836e-09	7.48715e-08
Adamts6	393.872	-0.528814	-5.87787	4.15575e-09	7.49423e-08
Adh1	168.896	-0.577665	-5.87563	4.21241e-09	7.59006e-08
Slc16a5	324.425	-0.766549	-5.8722	4.30039e-09	7.74213e-08
Ell2	1618.19	-0.493304	-5.87085	4.33562e-09	7.79907e-08
Asns	2222.68	-0.35799	-5.87049	4.34517e-09	7.80325e-08
Capn8	228.099	1.16416	5.87031	4.3498e-09	7.80508e-08
Cckbr	128.966	1.06389	5.86537	4.48133e-09	8.02774e-08
Sec14l4	833.149	-0.582649	-5.86268	4.55452e-09	8.1521e-08
Ammecr1	317.163	0.638671	5.85671	4.72121e-09	8.4156e-08
Sh3kbp1	311.262	-0.466356	-5.85656	4.7256e-09	8.41648e-08
Impdh1	1881.87	0.511992	5.85361	4.81023e-09	8.5531e-08
Chdh	322.066	-0.73544	-5.84523	5.05858e-09	8.97991e-08
Zfp286	350.483	0.322443	5.84366	5.10668e-09	9.05043e-08
B4galnt3	458.076	-0.689638	-5.84108	5.18639e-09	9.16506e-08
Gas5	7567.58	0.323244	5.84102	5.18833e-09	9.16506e-08
Tanc2	1009.97	0.360511	5.83792	5.28552e-09	9.3215e-08
Fam222a	1201.37	0.450608	5.83559	5.3602e-09	9.4455e-08
4930581F22Rik	546.667	0.340023	5.83341	5.4305e-09	9.56158e-08
Bdh2	344.849	0.408524	5.83016	5.5374e-09	9.74185e-08
Slc39a11	1008.72	-0.466781	-5.82725	5.63483e-09	9.89715e-08
Rad18	1146.75	-0.649443	-5.82178	5.82243e-09	1.02183e-07
Cotl1	954.936	-0.349338	-5.81297	6.13741e-09	1.07537e-07
AK040960	74.1008	-0.549748	-5.80695	6.362e-09	1.11381e-07
Gabra3	174.84	0.901729	5.79958	6.64825e-09	1.16299e-07
Dlgap1	516.127	0.904589	5.79681	6.75865e-09	1.17943e-07
Cyp2a5	219.603	0.82992	5.79418	6.86578e-09	1.19716e-07
Fam13a	723.66	-0.364685	-5.79379	6.88141e-09	1.19892e-07
Ctsc	448.163	0.45505	5.79259	6.93086e-09	1.20656e-07
Adrb1	59.1395	0.77191	5.7914	6.98017e-09	1.21417e-07
Psph	373.856	-0.369025	-5.78347	7.31757e-09	1.27081e-07
Casp7	214.224	-0.342872	-5.78075	7.43694e-09	1.2874e-07
St3gal1	422.08	-0.547599	-5.78057	7.44465e-09	1.2877e-07
Rhpn2	1003.12	-0.519582	-5.77868	7.52875e-09	1.30121e-07
Tspyl5	708.339	0.372569	5.77224	7.82255e-09	1.34875e-07
Kcnj3	1482.63	-0.549722	-5.76586	8.12443e-09	1.39634e-07
Fancf	133.739	0.427374	5.76452	8.18922e-09	1.40636e-07
Plxna2	633.153	0.366269	5.75996	8.41353e-09	1.44259e-07
Ak1	1068.16	0.366279	5.75414	8.70844e-09	1.48843e-07
Adssl1	577.619	-0.575692	-5.74711	9.07834e-09	1.54432e-07
Arhgap19	782.407	-0.39364	-5.74639	9.11702e-09	1.5493e-07
Pcdh1	363.634	0.341145	5.74383	9.25563e-09	1.56953e-07
Rmrp	10.6209	1.07098	5.7406	9.4343e-09	1.59732e-07
Scn2b	1063.81	0.46853	5.74035	9.44806e-09	1.5984e-07
Glb1l2	509.935	-0.490702	-5.72525	1.03282e-08	1.73777e-07
Rad9b_	137.15	0.367683	5.72325	1.04504e-08	1.75698e-07
Trim3	1920.68	0.438855	5.72007	1.06479e-08	1.78878e-07
1700025G04Rik	1644.36	-0.342823	-5.71008	1.12922e-08	1.89113e-07
Sgpp2	393.984	-0.526443	-5.70273	1.17902e-08	1.96389e-07
Pappa2	3043.05	-0.779078	-5.69981	1.19939e-08	1.99473e-07
Ccdc42b	21.1223	-0.941913	-5.6993	1.20299e-08	1.99918e-07
Abr	3399.16	-0.32798	-5.69891	1.20575e-08	2.00223e-07
Mid1	1004.66	0.899545	5.69417	1.23974e-08	2.05552e-07
Ralgapa2	1082.68	-0.361457	-5.69363	1.24365e-08	2.06041e-07
Spo11	65.0913	0.745935	5.69195	1.25597e-08	2.07764e-07
Tmem132a	987.481	0.326118	5.69056	1.26626e-08	2.09306e-07
Ager	82.1503	-0.419207	-5.68952	1.27397e-08	2.10419e-07
Nt5e	300.296	-0.44478	-5.68473	1.31018e-08	2.1607e-07
Synj2	242.114	0.333189	5.68224	1.32939e-08	2.18903e-07
Hey1	787.778	-0.335435	-5.68038	1.34392e-08	2.20959e-07
Gpr27	294.674	0.517303	5.67922	1.35311e-08	2.22302e-07
Gm3500	919.455	0.378627	5.67515	1.38563e-08	2.27126e-07
Olfr1507	79.1778	0.703079	5.6714	1.41639e-08	2.31815e-07
Jpx	242.351	0.337186	5.66292	1.48819e-08	2.42283e-07
1110038B12Rik	513.452	0.349989	5.66047	1.5096e-08	2.45398e-07
Jph1	101.445	0.531984	5.65483	1.56001e-08	2.53212e-07
Nrg4	117.141	0.74272	5.65305	1.57629e-08	2.55662e-07
Ttbk1	336.396	0.372975	5.64627	1.63964e-08	2.65737e-07
Epb4.1l1	1793.29	0.353213	5.6451	1.65085e-08	2.67354e-07
Rhbg	33.4118	-0.660435	-5.6408	1.69265e-08	2.73917e-07
Tifa	538.715	-0.376536	-5.63617	1.73877e-08	2.8117e-07
Psg16	109.556	-0.488433	-5.62922	1.81027e-08	2.91858e-07
Adgra3	530.358	0.422296	5.62651	1.83891e-08	2.96255e-07
Smox	583.824	-0.365288	-5.62352	1.87102e-08	3.00979e-07
Cnih2	422.276	0.442288	5.62218	1.88563e-08	3.02879e-07
Sulf2	1098.81	-0.342416	-5.62196	1.88798e-08	3.03031e-07
Zfp503	300.148	0.466174	5.61712	1.94166e-08	3.10493e-07
Anpep	237.329	0.415408	5.61242	1.99516e-08	3.18107e-07
Rapgefl1	489.478	0.441278	5.61096	2.01203e-08	3.2056e-07
Gm973	350.822	-0.416977	-5.61069	2.01526e-08	3.20838e-07
Ppm1j	317.406	-0.554655	-5.60937	2.03067e-08	3.22815e-07
Fam46b	178.44	0.695772	5.60501	2.08245e-08	3.30804e-07
B230319C09Rik	50.6514	-0.561637	-5.60094	2.13191e-08	3.37914e-07
Pbdc1	1340.79	0.34906	5.59788	2.16988e-08	3.43177e-07
AK090172	348.962	0.694469	5.59515	2.20426e-08	3.4836e-07
Nrip3	971.475	-0.611495	-5.59487	2.20788e-08	3.48676e-07
Ninj2	18.4165	-0.818448	-5.59461	2.21115e-08	3.48938e-07
Iqcd	136.287	-0.465626	-5.59284	2.23383e-08	3.5226e-07
Nol9	631.617	0.339942	5.59186	2.24644e-08	3.5399e-07
Rasgef1b	273.111	-0.471786	-5.59006	2.26987e-08	3.57422e-07
Icosl	243.874	0.374605	5.58267	2.36852e-08	3.71601e-07
Syne1	2361.26	-0.342192	-5.57414	2.48762e-08	3.89438e-07
Cfap69	392.393	-0.464999	-5.56982	2.54998e-08	3.98913e-07
Pnp2	225.162	-0.369659	-5.56847	2.56986e-08	4.0173e-07
Plekhg1	177.679	-0.467659	-5.56789	2.57835e-08	4.02767e-07
Tmem28	145.394	0.396303	5.56705	2.59081e-08	4.04129e-07
Chac1	307.746	-0.616502	-5.5625	2.65933e-08	4.1392e-07
Clybl	418.878	0.455697	5.55665	2.74999e-08	4.26802e-07
Mir17hg	72.0044	0.668667	5.55628	2.75588e-08	4.27409e-07
BC039966	16.3907	-0.811371	-5.55308	2.80674e-08	4.34568e-07
Pip5k1b	496.458	-0.443072	-5.55278	2.81162e-08	4.34805e-07
Fam57b	838.533	0.328472	5.54567	2.92827e-08	4.52196e-07
Ptpro	2252	0.368493	5.54423	2.95243e-08	4.55602e-07
Nek5	184.084	-0.559532	-5.53498	3.11261e-08	4.7861e-07
Slc16a1	647.138	0.413395	5.52894	3.22166e-08	4.95027e-07
Rnf144b	166.209	-0.491254	-5.52803	3.23842e-08	4.97249e-07
C530044C16Rik	64.3432	-0.620805	-5.52537	3.28785e-08	5.04121e-07
1190005I06Rik	57.9616	-0.543767	-5.52447	3.30491e-08	5.06377e-07
Nt5c1a	31.8519	0.710294	5.52095	3.37172e-08	5.15153e-07
Setmar	193.205	-0.349734	-5.51981	3.3937e-08	5.18145e-07
Mc3r	353.18	0.692858	5.5196	3.39772e-08	5.18392e-07
Pcdhgc3	1064.37	0.38592	5.51553	3.47726e-08	5.29405e-07
Etfdh	3261.81	0.359492	5.50887	3.6115e-08	5.47529e-07
Adgrf1	111.151	0.713515	5.50539	3.68351e-08	5.58054e-07
Syde1	274.537	0.360314	5.50308	3.73217e-08	5.6503e-07
Pyroxd2	399.981	0.354055	5.50134	3.76918e-08	5.69835e-07
Trib3	241.418	-0.848022	-5.49956	3.8075e-08	5.75225e-07
Prr7	206.898	0.614537	5.49885	3.82286e-08	5.77143e-07
Efs	720.425	0.442508	5.49546	3.89687e-08	5.87085e-07
2410004N09Rik	196.369	0.347604	5.49428	3.92307e-08	5.90071e-07
Per3	4724.78	-0.383041	-5.4942	3.92489e-08	5.90071e-07
Gas7	449.291	0.573403	5.47333	4.4165e-08	6.58482e-07
Bcl9l	737.885	0.332009	5.46843	4.54036e-08	6.75551e-07
Btg1	2262.4	-0.375407	-5.46758	4.56212e-08	6.78321e-07
AK005214	8.29134	-1.03684	-5.46515	4.62516e-08	6.86276e-07
Mtss1l	1057.71	0.56289	5.45345	4.94019e-08	7.29514e-07
Kank4	269.133	0.401228	5.45211	4.97755e-08	7.34027e-07
Inhba	33.751	-0.840193	-5.44725	5.11557e-08	7.53764e-07
Plekhh1	579.071	-0.543148	-5.44715	5.11837e-08	7.53764e-07
DXBay18	876.703	-0.41295	-5.4462	5.14577e-08	7.57284e-07
Slc24a4	61.274	-0.55809	-5.44175	5.27587e-08	7.74846e-07
Kcne1l	30.5611	0.797528	5.43926	5.35034e-08	7.84717e-07
AK030382	147.107	-0.498657	-5.43763	5.39944e-08	7.90844e-07
Il23a	54.1303	-0.793382	-5.43398	5.51108e-08	8.04469e-07
Kcna2	1087.53	-0.573861	-5.4322	5.56648e-08	8.12007e-07
Acsf2	462.241	0.430771	5.43195	5.5742e-08	8.12584e-07
Klhl5	564.612	0.342613	5.43165	5.58364e-08	8.13412e-07
Klhdc8b	3017.02	0.360147	5.42841	5.6858e-08	8.26622e-07
Ankra2	1599.1	0.47001	5.42318	5.85467e-08	8.506e-07
Map3k13	215.771	0.375202	5.41902	5.99272e-08	8.70072e-07
Mmp16	173.357	0.418539	5.41541	6.11493e-08	8.86833e-07
Tuba4a	3240.91	-0.363903	-5.41537	6.11637e-08	8.86833e-07
Aqp3	205.837	-0.457749	-5.40419	6.51013e-08	9.40139e-07
Gpr179	1148.05	-0.493397	-5.40386	6.52209e-08	9.41238e-07
Sdc1	778.473	-0.33262	-5.40236	6.57703e-08	9.48532e-07
4732491K20Rik	193.385	-0.352836	-5.39666	6.78932e-08	9.76541e-07
Heph	127.801	-0.351136	-5.3961	6.81065e-08	9.78958e-07
Cdk5r1	493.655	0.566827	5.39533	6.83989e-08	9.82507e-07
Dpy19l4	743.495	-0.344989	-5.39311	6.92474e-08	9.93556e-07
Ccdc151	293.107	-0.404502	-5.38486	7.25003e-08	1.03728e-06
Usp43	98.4017	0.480498	5.38307	7.32265e-08	1.04559e-06
Fads6	104.853	-0.513782	-5.38261	7.34139e-08	1.04758e-06
Stox1	220.818	-0.422375	-5.37657	7.59179e-08	1.08117e-06
Gm29684	78.0305	0.691093	5.37531	7.64516e-08	1.08733e-06
Zfp133-ps	244.236	0.346809	5.36882	7.92548e-08	1.12498e-06
Ece2	1619.09	0.362681	5.36802	7.96048e-08	1.12921e-06
Vip	53.7602	0.977166	5.35962	8.33966e-08	1.17912e-06
Lrrc52	61.6878	-0.698919	-5.3564	8.48944e-08	1.19952e-06
Rundc1	2073.33	0.332221	5.3546	8.57463e-08	1.20839e-06
Rhobtb1	136.029	0.426361	5.35178	8.70939e-08	1.22499e-06
AK162138	79.6812	-0.499209	-5.34274	9.15498e-08	1.28515e-06
Pla2g2e	19.0809	-0.992293	-5.33915	9.33821e-08	1.31002e-06
Tspan13	8018.27	0.432125	5.33894	9.34913e-08	1.3107e-06
Camp	21.7875	-1.13328	-5.33622	9.49024e-08	1.32962e-06
Bcar3	511.45	0.401105	5.33359	9.6289e-08	1.34817e-06
Epor	65.356	-0.559982	-5.333	9.66021e-08	1.3508e-06
Rpph1	22.2485	0.915792	5.33253	9.68555e-08	1.35347e-06
Scn11a	171.152	0.793399	5.33094	9.77041e-08	1.36445e-06
Wscd2	209.667	-0.601658	-5.32501	1.00947e-07	1.40701e-06
Fam196a	162.884	-0.772733	-5.32372	1.01668e-07	1.41523e-06
Klhl29	458.685	-0.434023	-5.32095	1.03226e-07	1.43414e-06
Lppr3	571.522	0.555256	5.3179	1.04972e-07	1.45653e-06
Bik	166.084	-0.401422	-5.31712	1.05425e-07	1.46187e-06
Wipf3	707.993	-0.371959	-5.31698	1.05504e-07	1.46203e-06
Lyn	302.024	-0.429768	-5.31236	1.08212e-07	1.4986e-06
Adcy8	100.697	0.946393	5.30842	1.10582e-07	1.52858e-06
Cpa2	894.364	0.413813	5.30389	1.13358e-07	1.56285e-06
Cyp27a1	852.035	-0.642446	-5.30242	1.1428e-07	1.57356e-06
S100a8	49.4341	-1.07704	-5.29387	1.19756e-07	1.64059e-06
Rhbdf1	353.041	-0.425606	-5.29299	1.20333e-07	1.64641e-06
Tinagl1	617.505	-0.396001	-5.29177	1.21137e-07	1.65635e-06
AK018092	292.121	0.605056	5.28925	1.2282e-07	1.67725e-06
Dclk3	120.749	-0.638403	-5.2817	1.27993e-07	1.74568e-06
Rassf8	313.746	0.377913	5.27765	1.30854e-07	1.78132e-06
Ddo	819.565	0.352313	5.27648	1.31689e-07	1.79045e-06
Hmox1	235.23	-0.358702	-5.26832	1.37679e-07	1.86835e-06
AK007082	318.227	-0.359585	-5.26785	1.38029e-07	1.87193e-06
Trpc1	411.119	-0.356347	-5.26656	1.39004e-07	1.88397e-06
AK187054	1320.4	0.377508	5.26506	1.40145e-07	1.89824e-06
AK140017	45.3933	-0.672117	-5.258	1.45631e-07	1.96515e-06
Atf5	1580.93	-0.359571	-5.25362	1.49136e-07	2.00793e-06
Angptl6	328.724	-0.413833	-5.25163	1.50763e-07	2.02807e-06
Gdf11	176.111	0.457113	5.24773	1.53987e-07	2.06886e-06
Qsox1	2255.62	0.401959	5.24738	1.54281e-07	2.07152e-06
Atcayos	117.747	-0.549431	-5.24187	1.58961e-07	2.13304e-06
Ust	187.227	0.436352	5.24054	1.60111e-07	2.1458e-06
Apoc3	46.3743	0.646792	5.23874	1.61679e-07	2.16279e-06
Spata6	606.141	-0.327387	-5.23814	1.62206e-07	2.16851e-06
Parm1	1505.33	-0.342233	-5.23161	1.68041e-07	2.23957e-06
Sema5a	751.874	-0.380351	-5.22856	1.70831e-07	2.27116e-06
Cldn4	508.511	-0.363161	-5.22028	1.78648e-07	2.362e-06
Tnfrsf14	115.621	-0.503408	-5.21986	1.79062e-07	2.36603e-06
Cacna1h	744.464	-0.505961	-5.21949	1.79414e-07	2.36633e-06
Pak6	658.008	0.581395	5.21516	1.83656e-07	2.41638e-06
Itgbl1	127.483	-0.459159	-5.21117	1.87657e-07	2.46452e-06
Cdc42ep1	409.559	0.359914	5.20473	1.94279e-07	2.5453e-06
Pcdh7	319.811	0.471189	5.19715	2.02371e-07	2.6433e-06
Eno1b	1756.65	0.343901	5.19592	2.03709e-07	2.65918e-06
Abtb2	254.955	0.52318	5.19054	2.09682e-07	2.7289e-06
Lhfpl2	585.157	-0.473942	-5.18818	2.12361e-07	2.76044e-06
Nfkbia	1774.44	0.479373	5.18535	2.15612e-07	2.79764e-06
Rab15	368.383	-0.517383	-5.18074	2.21004e-07	2.86245e-06
Ngp	69.5421	-1.09217	-5.17574	2.27003e-07	2.93223e-06
Cbr2	543.595	0.41723	5.17399	2.29142e-07	2.95722e-06
6720489N17Rik	84.5112	-0.452561	-5.17313	2.3021e-07	2.96923e-06
Rxfp2	94.5769	1.02604	5.169	2.35355e-07	3.03016e-06
Slc7a3	120.44	-0.945207	-5.16619	2.38916e-07	3.07235e-06
Sec24d	3380.12	0.337835	5.16289	2.4316e-07	3.12506e-06
Snai2	125.797	0.984909	5.1567	2.51337e-07	3.22248e-06
Trim14	215.706	-0.341607	-5.15608	2.52175e-07	3.23131e-06
Mbp	1690.8	0.574133	5.14836	2.62778e-07	3.3592e-06
Cth	44.9685	-0.631555	-5.14584	2.66325e-07	3.40223e-06
Cdh26	551.142	0.489861	5.14508	2.67405e-07	3.4123e-06
Rhbdf2	209.167	-0.490197	-5.14424	2.68609e-07	3.42232e-06
Cited1	225.844	0.994154	5.13911	2.76037e-07	3.51207e-06
Cryba4	31.3902	-0.685494	-5.13553	2.81356e-07	3.56796e-06
Hivep3	345.109	0.388109	5.13181	2.86975e-07	3.63412e-06
Prkg1	207.392	-0.401957	-5.12916	2.91038e-07	3.68341e-06
Psmb8	527.619	-0.327411	-5.12804	2.92776e-07	3.70107e-06
Tmem200b	58.2335	0.848716	5.1258	2.96281e-07	3.73663e-06
Gli2	304.258	-0.481758	-5.12444	2.98422e-07	3.75925e-06
Prlr	1872.6	-0.379263	-5.12218	3.0203e-07	3.80027e-06
9430037G07Rik	94.3365	-0.438865	-5.11542	3.13048e-07	3.92974e-06
Mt3	1049.75	0.397056	5.11248	3.17953e-07	3.98468e-06
Trmt61a	535.864	0.493511	5.11083	3.20742e-07	4.01466e-06
Kcnmb2	524.91	-0.552567	-5.10799	3.25603e-07	4.07079e-06
Mob3b	226.188	0.375669	5.10605	3.28959e-07	4.10563e-06
Plod1	1058.38	0.350213	5.10237	3.3543e-07	4.18396e-06
Fgf14	874.622	-0.350452	-5.09786	3.43519e-07	4.27499e-06
Pcp4	261.997	-0.552823	-5.08795	3.61946e-07	4.4888e-06
Grhl1	200.977	-0.526352	-5.0856	3.66466e-07	4.53928e-06
Rgs19	212.637	0.441082	5.07159	3.94509e-07	4.84811e-06
Hif3a	415.665	-0.523588	-5.07135	3.95001e-07	4.85139e-06
Cxcr4	298.23	0.391143	5.06624	4.05745e-07	4.96923e-06
AK216726	69.0874	0.715253	5.06174	4.15441e-07	5.0851e-06
Scn3b	399.991	0.468243	5.05097	4.39563e-07	5.34402e-06
Ppp1r32	41.042	-0.625611	-5.04826	4.45861e-07	5.41754e-06
Cpz	76.2957	0.669611	5.04541	4.52546e-07	5.49259e-06
Dach2	244.33	0.451404	5.04383	4.56296e-07	5.53188e-06
Folr1	987.293	0.406429	5.04319	4.57825e-07	5.5473e-06
Gareml	131.7	-0.820706	-5.0424	4.59725e-07	5.56721e-06
Gm11468	7.40561	-0.938626	-5.04219	4.60224e-07	5.56818e-06
Gm5083	24.3742	-0.687687	-5.02968	4.91301e-07	5.91601e-06
Hk2	398.614	-0.575584	-5.02959	4.91541e-07	5.91601e-06
Thrb	3424.83	0.549282	5.02871	4.9378e-07	5.93966e-06
Ikbke	253.21	-0.375971	-5.02658	4.99301e-07	5.99939e-06
AK135254	173.236	0.378266	5.02201	5.1133e-07	6.13369e-06
Mfge8	5640.25	0.380646	5.02119	5.13521e-07	6.14972e-06
Dpf1	400.543	-0.342757	-5.02103	5.1396e-07	6.15157e-06
Slc39a14	1934.23	-0.344495	-5.01541	5.29206e-07	6.32005e-06
Serpinb3c	57.8086	0.793905	5.01341	5.34727e-07	6.37893e-06
Gpc2	185.622	-0.329655	-5.01206	5.38505e-07	6.41692e-06
Grik2	1110.48	0.363789	5.00942	5.45934e-07	6.49469e-06
Klk8	96.5781	-0.432935	-5.00545	5.57304e-07	6.61538e-06
Ptpn14	255.259	0.508581	5.00204	5.67256e-07	6.72612e-06
Pltp	333.048	0.508971	4.99747	5.80886e-07	6.86889e-06
Tmem159	736.617	-0.342129	-4.99692	5.8253e-07	6.88456e-06
Kcnip2	404.961	-0.539576	-4.99493	5.88585e-07	6.95232e-06
Ppfibp2	445.54	-0.531898	-4.99465	5.89411e-07	6.95827e-06
AK028782	282.786	0.432607	4.99175	5.98354e-07	7.05999e-06
Gm26391	52.4374	0.903966	4.98291	6.26362e-07	7.35831e-06
Lilra6	99.7116	-0.776219	-4.98197	6.29412e-07	7.3861e-06
Mitf	245.474	-0.417174	-4.97046	6.67958e-07	7.80874e-06
Gm3317	642.313	0.476229	4.96559	6.84927e-07	7.98551e-06
Mboat2	303.063	-0.425145	-4.9591	7.08193e-07	8.23455e-06
Bmper	550.848	-0.542191	-4.95299	7.30826e-07	8.48402e-06
Etl4	589.59	0.342738	4.95264	7.32115e-07	8.49443e-06
Wscd1	366.568	-0.517657	-4.95006	7.41894e-07	8.59865e-06
Fam110c	216.885	-0.368346	-4.94943	7.44326e-07	8.6222e-06
Med12l	476.602	0.347845	4.94884	7.46571e-07	8.64358e-06
Dtx1	1441.4	0.322385	4.94791	7.50138e-07	8.68022e-06
Ctxn2	87.9862	-0.429108	-4.94437	7.6391e-07	8.83013e-06
Gm23284	38.9604	0.90343	4.94177	7.74165e-07	8.94388e-06
Col18a1	649.58	-0.353833	-4.94154	7.7509e-07	8.94501e-06
Fstl5	126.846	0.889519	4.94065	7.78634e-07	8.9811e-06
AK080982	140.347	-0.525864	-4.9342	8.04798e-07	9.24833e-06
Mapkapk3	588.374	-0.330841	-4.93226	8.12818e-07	9.33056e-06
Msh5	65.5456	-0.578121	-4.92729	8.33768e-07	9.55327e-06
B2m	7971.08	-0.43551	-4.92123	8.60028e-07	9.82032e-06
Fank1	95.6006	-0.425495	-4.92093	8.61323e-07	9.82472e-06
Btbd11	243.749	-0.38339	-4.91775	8.75428e-07	9.97295e-06
C1s1	282.194	-0.330929	-4.91769	8.75703e-07	9.97295e-06
Fmo2	144.557	-0.470671	-4.91385	8.93032e-07	1.01649e-05
Syndig1	268.71	0.546181	4.90935	9.13774e-07	1.0352e-05
Gm5796	347.753	0.485543	4.90704	9.24589e-07	1.04635e-05
Dock5	401.939	0.356265	4.90498	9.3437e-07	1.05631e-05
Ifrd2	513.818	0.381599	4.90392	9.39426e-07	1.06141e-05
Actr3b	911.715	-0.425095	-4.89891	9.63695e-07	1.08776e-05
Asic2	335.047	0.94155	4.89387	9.88728e-07	1.11368e-05
Amer2	586.011	0.395103	4.89	1.00836e-06	1.13285e-05
Klhl33	227.874	-0.540632	-4.88273	1.04625e-06	1.17114e-05
Ntn4	183.625	0.449783	4.87943	1.06394e-06	1.19033e-05
Lama2	565.315	-0.358638	-4.87814	1.0709e-06	1.1975e-05
Arhgap24	1124.06	0.441244	4.87657	1.07946e-06	1.20644e-05
2810433D01Rik	29.4318	-0.773594	-4.87566	1.08447e-06	1.21142e-05
Pcdh18	178.271	0.540003	4.87049	1.11322e-06	1.24097e-05
Tubb2b	1522.6	0.379651	4.86804	1.12713e-06	1.25454e-05
Pla2r1	326.606	-0.631049	-4.85993	1.17428e-06	1.30098e-05
Mmp7	53.2887	-0.928827	-4.85982	1.17495e-06	1.30106e-05
Arid5b	1134.93	0.358713	4.84959	1.23719e-06	1.36397e-05
Me3	370.507	0.460754	4.84955	1.23745e-06	1.36397e-05
Sytl1	1010.87	0.350778	4.84884	1.24183e-06	1.3681e-05
Epas1	1653.29	0.35972	4.84765	1.2493e-06	1.37563e-05
Gm996	1328.32	0.348366	4.8409	1.29255e-06	1.41891e-05
Dnah9	1256.65	-0.68185	-4.84076	1.29342e-06	1.41915e-05
Ak4	1129.72	-0.37807	-4.83888	1.30573e-06	1.43121e-05
Mmp19	66.5108	-0.797149	-4.83875	1.30657e-06	1.4314e-05
Plet1	47.8402	0.81502	4.83628	1.32288e-06	1.4456e-05
Spred2	537.758	0.412905	4.83572	1.32665e-06	1.44899e-05
Dtna	1467.53	-0.432847	-4.83381	1.33943e-06	1.46147e-05
Abca1	2165.52	-0.377883	-4.83076	1.36016e-06	1.48187e-05
Spef2	217.518	-0.339959	-4.82951	1.3687e-06	1.48965e-05
Elfn1	103.021	0.58588	4.82848	1.37579e-06	1.49661e-05
Mlkl	45.9182	-0.595591	-4.82636	1.39052e-06	1.51187e-05
Gdpd2	139.394	0.439975	4.82463	1.40261e-06	1.52271e-05
Tln2	639.103	0.340681	4.82321	1.41264e-06	1.53283e-05
Adcyap1r1	690.696	-0.612088	-4.81167	1.49674e-06	1.61407e-05
Gipc2	56.6316	-0.504765	-4.81161	1.49722e-06	1.61407e-05
Grik1	436.362	0.588047	4.8098	1.51081e-06	1.6273e-05
Cilp	743.858	-0.789651	-4.80978	1.511e-06	1.6273e-05
Eva1a	40.2064	-0.618117	-4.80677	1.53385e-06	1.64781e-05
Gm3383	1679.84	0.34979	4.80464	1.55029e-06	1.66463e-05
Plet1os	22.8572	0.875544	4.79991	1.58734e-06	1.69851e-05
Matn2	277.543	-0.381744	-4.79652	1.61446e-06	1.72411e-05
Ankrd45	473.5	-0.349494	-4.79211	1.65037e-06	1.75985e-05
Sstr4	37.4293	0.614373	4.7839	1.71924e-06	1.82698e-05
Pcdhga12	144.547	0.383129	4.78165	1.73862e-06	1.84575e-05
Bmyc	898.26	-0.391018	-4.78138	1.74098e-06	1.84735e-05
Dctd	122.406	0.607823	4.77785	1.77176e-06	1.87633e-05
Clgn	157.979	-0.514666	-4.77746	1.77521e-06	1.87906e-05
1810019D21Rik	76.4127	-0.437227	-4.7701	1.84137e-06	1.94338e-05
Cd27	52.4988	-0.594007	-4.76732	1.86691e-06	1.96553e-05
Dgkg	277.744	-0.489678	-4.76383	1.8995e-06	1.99692e-05
Snhg4	949.774	0.356208	4.76058	1.93034e-06	2.02666e-05
Acy3	82.416	-0.510284	-4.76056	1.93059e-06	2.02666e-05
Serinc2	1377.92	-0.323466	-4.75755	1.95953e-06	2.05415e-05
Atoh7	9.03816	-0.847436	-4.75641	1.97065e-06	2.06369e-05
4632428C04Rik	62.3008	-0.59421	-4.75604	1.97427e-06	2.06648e-05
AK085062	84.9637	0.590653	4.75462	1.98825e-06	2.0791e-05
Lox	709.49	0.533067	4.74469	2.08829e-06	2.17844e-05
Alpl	177.649	0.649904	4.74295	2.10624e-06	2.19504e-05
Drp2	190.132	-0.590255	-4.74283	2.10758e-06	2.19538e-05
B3gnt9	1490.9	0.442128	4.73438	2.19727e-06	2.28002e-05
Pcdhb6	153.428	0.523574	4.73027	2.24216e-06	2.31991e-05
Erbb2	207.191	0.408359	4.73002	2.24495e-06	2.32168e-05
Cemip	283.996	-0.428114	-4.72705	2.27809e-06	2.3537e-05
Ccdc60	188.236	0.414877	4.72663	2.2828e-06	2.35519e-05
Cabp7	24.9784	-0.739076	-4.72517	2.29924e-06	2.36989e-05
Nmt2	1130.37	-0.322995	-4.72055	2.35212e-06	2.41978e-05
Kif18a	288.19	0.588478	4.7183	2.37828e-06	2.44087e-05
AK136740	111.16	0.702692	4.70465	2.54305e-06	2.59229e-05
Reep6	159.707	-0.559125	-4.70427	2.54774e-06	2.59507e-05
Dgke	1207.29	-0.325273	-4.70344	2.55818e-06	2.60447e-05
Peo1	762.671	0.402388	4.70103	2.58851e-06	2.63304e-05
Abhd15	214.397	-0.442617	-4.70102	2.58867e-06	2.63304e-05
Akr1b8	164.254	-0.339254	-4.70088	2.59037e-06	2.63352e-05
Glra2	860.123	0.377039	4.69567	2.65737e-06	2.69694e-05
Mrvi1	96.126	0.389352	4.69564	2.65774e-06	2.69694e-05
Sapcd1	40.0875	-0.645526	-4.69497	2.66652e-06	2.70458e-05
Dnm1	1311.98	0.49765	4.69325	2.68903e-06	2.72613e-05
Sox4	1287.24	0.417909	4.68862	2.75057e-06	2.77975e-05
Trpc3	175.63	0.496959	4.68844	2.75302e-06	2.78056e-05
Osbpl1a	978.49	-0.336147	-4.68829	2.75496e-06	2.78122e-05
Cnga3	105.402	0.760801	4.68763	2.76386e-06	2.7876e-05
9630028I04Rik	222.006	-0.557932	-4.68219	2.8382e-06	2.85858e-05
AI839979	32.0668	-0.579586	-4.6817	2.84512e-06	2.86421e-05
Mfap4	274.349	-0.423419	-4.6815	2.8478e-06	2.86558e-05
Irak2	515.776	-0.515488	-4.68019	2.86608e-06	2.88144e-05
Ism1	90.8642	-0.489103	-4.68018	2.86623e-06	2.88144e-05
2810468N07Rik	154.349	-0.349573	-4.67688	2.91269e-06	2.91999e-05
AK208095	152.78	0.400362	4.67652	2.91789e-06	2.92259e-05
AK011748	167.713	0.458401	4.67504	2.93899e-06	2.94226e-05
Diras2	742.418	0.420721	4.66502	3.0859e-06	3.08077e-05
Syndig1l	470.168	0.614007	4.6623	3.12701e-06	3.11461e-05
Fgfr1	2109.52	0.348789	4.65907	3.17638e-06	3.16087e-05
Mdm1	1803.15	-0.452951	-4.65895	3.17826e-06	3.16114e-05
C030017K20Rik	210.358	-0.405074	-4.65883	3.18014e-06	3.16114e-05
Pcdhb11	171.3	0.521172	4.65813	3.19094e-06	3.16661e-05
Cyp2s1	248.502	0.333513	4.65791	3.19431e-06	3.16849e-05
Tspan18	274.115	-0.483884	-4.65704	3.20784e-06	3.18045e-05
Jun	660.724	0.574579	4.65317	3.26874e-06	3.2349e-05
AK085792	20.0204	-0.730376	-4.65199	3.28742e-06	3.24829e-05
Srm	1258.51	0.401702	4.64782	3.35458e-06	3.30098e-05
Gm10409	466.926	0.518695	4.64777	3.35537e-06	3.30098e-05
Hepacam	245.543	0.532805	4.6433	3.42893e-06	3.36415e-05
Cerk	1024.58	0.337775	4.63631	3.54676e-06	3.4703e-05
Plcd3	116.825	0.344699	4.63472	3.57422e-06	3.49558e-05
Haus4	94.3856	-0.363202	-4.63397	3.58719e-06	3.50669e-05
Col9a2	205.948	0.461621	4.63376	3.59081e-06	3.50705e-05
Fgf12	463.507	0.431966	4.63183	3.62442e-06	3.53491e-05
Irak3	76.5515	-0.505998	-4.63168	3.62707e-06	3.53491e-05
Gm35612	36.3775	-0.589164	-4.63125	3.63462e-06	3.53863e-05
Rasef	177.611	0.401051	4.62769	3.69774e-06	3.59847e-05
Jdp2	209.151	0.369694	4.60985	4.02953e-06	3.90552e-05
Gm15612	132.463	-0.388771	-4.60653	4.09437e-06	3.9577e-05
Upb1	170.372	0.408336	4.60357	4.15301e-06	4.00185e-05
Jazf1	1540.23	0.552406	4.60198	4.18486e-06	4.02716e-05
AK077481	24.8901	0.699912	4.59129	4.40518e-06	4.22038e-05
Usp53	672.262	-0.33086	-4.58071	4.63398e-06	4.42976e-05
Cyp2t4	348.369	-0.580823	-4.58028	4.64354e-06	4.43693e-05
Gm6654	769.265	0.358236	4.57745	4.7068e-06	4.49142e-05
Hist3h2ba	245.48	0.467893	4.57713	4.71401e-06	4.49631e-05
Rpl39	974.095	0.327837	4.57373	4.79123e-06	4.56392e-05
AK076489	152.677	-0.374325	-4.57233	4.82339e-06	4.59051e-05
Prr5	97.8408	-0.445816	-4.57184	4.83466e-06	4.59719e-05
Tbkbp1	357.827	0.336499	4.57083	4.85806e-06	4.6174e-05
Got1	2890.68	-0.34331	-4.57017	4.87334e-06	4.62581e-05
Gp49a	53.9939	-0.458843	-4.5664	4.96177e-06	4.69738e-05
Gm14379	91.0148	-0.418758	-4.56337	5.03383e-06	4.75934e-05
Foxl2	511.224	0.365358	4.56304	5.0419e-06	4.76322e-05
Gpatch4	354.079	0.390495	4.56296	5.04363e-06	4.76322e-05
Ackr3	251.099	-0.394009	-4.56293	5.04455e-06	4.76322e-05
4833419F23Rik	32.5698	-0.640233	-4.55839	5.15471e-06	4.85867e-05
Maats1	110.18	0.338498	4.55779	5.16953e-06	4.86846e-05
Prss50	34.196	-0.561105	-4.55302	5.28818e-06	4.96721e-05
Mfsd6l	136.152	-0.451967	-4.55016	5.36039e-06	5.03067e-05
Trhr	236.848	-0.589181	-4.54983	5.36883e-06	5.03639e-05
Hic1	188.633	0.420596	4.54735	5.43243e-06	5.09164e-05
Tango6	186.209	0.328507	4.54571	5.47497e-06	5.12484e-05
Blnk	48.4374	0.533222	4.54317	5.54149e-06	5.18485e-05
Efcab12	395.608	-0.369445	-4.54023	5.61931e-06	5.24404e-05
AK077811	114.157	-0.403143	-4.5367	5.71426e-06	5.32574e-05
Arntl2	137.646	0.371041	4.5353	5.75206e-06	5.35636e-05
Gm2897	385.129	0.343766	4.53403	5.78679e-06	5.38174e-05
Mamstr	150.144	-0.474941	-4.53305	5.81367e-06	5.40434e-05
Sdc3	1129.59	0.426564	4.53269	5.8236e-06	5.40434e-05
Crabp1	22.6797	0.740859	4.52928	5.91855e-06	5.48069e-05
Ttc24	224.56	-0.401503	-4.52177	6.13236e-06	5.66411e-05
Rem2	1263.11	0.426904	4.51735	6.26179e-06	5.77378e-05
Adam23	736.076	-0.346747	-4.51531	6.32233e-06	5.81967e-05
Gjc1	78.1701	0.403497	4.51476	6.339e-06	5.82563e-05
Tac4	26.9522	-0.749774	-4.51474	6.33959e-06	5.82563e-05
2900052N01Rik	79.8855	-0.616806	-4.51425	6.35399e-06	5.83638e-05
Akr1c13	31.9858	0.562902	4.50498	6.63781e-06	6.07384e-05
Kcnf1	169.974	0.813655	4.50309	6.69717e-06	6.12556e-05
Cbln4	130.443	0.549809	4.49862	6.83952e-06	6.24782e-05
Timp1	98.1736	-0.423773	-4.49742	6.87825e-06	6.27789e-05
Slc14a2	128.17	0.631093	4.49278	7.02997e-06	6.40285e-05
Ptgis	91.9883	-0.398594	-4.49108	7.08622e-06	6.44592e-05
Rph3a	236.012	0.52292	4.48783	7.19514e-06	6.52851e-05
Mir486	5.61717	0.891779	4.48559	7.27112e-06	6.58915e-05
Pon3	520.654	-0.329376	-4.48405	7.32404e-06	6.62599e-05
Bmi1_	129.119	0.326787	4.48391	7.32879e-06	6.62751e-05
Cfap70	315.028	-0.385124	-4.48128	7.41973e-06	6.70413e-05
Fam20c	1730.43	-0.35519	-4.47531	7.63011e-06	6.88558e-05
Dpp4	134.947	0.472612	4.4735	7.69505e-06	6.93261e-05
BC035947_	65.8486	0.438359	4.47151	7.76689e-06	6.9915e-05
Pcdhgc5	253.528	0.34501	4.47006	7.81968e-06	7.03316e-05
Tgm2	1721.87	-0.383084	-4.46637	7.95566e-06	7.14654e-05
AK171817	108.145	-0.426313	-4.4662	7.96213e-06	7.14937e-05
Nr1h4	90.5723	0.640746	4.46536	7.99361e-06	7.1687e-05
Myo1d	601.941	-0.348095	-4.46088	8.16251e-06	7.30803e-05
Rnd3	488.585	0.73612	4.4599	8.19996e-06	7.33549e-05
Rassf4	1302.93	-0.383822	-4.45717	8.30481e-06	7.42006e-05
Meox1	205.357	-0.369889	-4.45594	8.35249e-06	7.45341e-05
Sertm1	90.8551	0.476542	4.45274	8.47819e-06	7.5531e-05
Grap2	112.786	0.628051	4.4485	8.64735e-06	7.68796e-05
Anxa1	162.125	-0.433229	-4.44752	8.68681e-06	7.71986e-05
Gng7	354.219	0.375385	4.43168	9.35011e-06	8.26175e-05
Ptprd	1705.67	-0.337381	-4.42987	9.42899e-06	8.32464e-05
Adprhl1	103.298	0.567281	4.42969	9.43699e-06	8.3283e-05
Sstr2	110.017	-0.725598	-4.42743	9.53603e-06	8.40197e-05
Perp	1354.41	0.541906	4.42543	9.62483e-06	8.4733e-05
Tnni2	13.4785	-0.70762	-4.41977	9.8806e-06	8.67726e-05
2810047C21Rik1	97.4083	-0.591285	-4.41403	1.01464e-05	8.88652e-05
Gpr45	75.1813	0.415914	4.414	1.01477e-05	8.88652e-05
Vstm5	84.0872	-0.418322	-4.41351	1.0171e-05	8.90336e-05
Stxbp6	423.602	0.388935	4.40501	1.0578e-05	9.22226e-05
Cabp2	50.284	-0.539711	-4.40042	1.08039e-05	9.40781e-05
Stk17b	214.499	-0.350997	-4.39304	1.11777e-05	9.70592e-05
Pla2g5	343.223	0.38776	4.38989	1.1341e-05	9.8319e-05
Pde5a	488.405	-0.341352	-4.3868	1.1503e-05	9.96035e-05
Vav2	619.119	-0.334918	-4.37735	1.2013e-05	0.000103687
Rrm2	44.3001	-0.614742	-4.37571	1.21038e-05	0.000104304
Lingo2	294.007	0.779117	4.37508	1.21391e-05	0.000104566
Syce2	220.573	0.391518	4.37471	1.21593e-05	0.000104699
AK076947	77.5523	0.419679	4.37152	1.23382e-05	0.000106197
Spon1	646.883	0.437513	4.37072	1.23837e-05	0.000106546
Pdzrn3	117.159	0.408746	4.36699	1.2597e-05	0.000108166
AK145614	122.293	-0.559026	-4.36378	1.27837e-05	0.000109638
Mgat3	670.321	0.434671	4.36163	1.29097e-05	0.000110588
Kctd8	89.7979	0.586044	4.35649	1.32167e-05	0.000113003
Plekho2	253.712	0.361612	4.35647	1.32178e-05	0.000113003
DQ721344	191.509	0.498185	4.35194	1.34936e-05	0.000115042
AK020645	28.0015	-0.511167	-4.3506	1.35763e-05	0.000115701
Gdf1	305.566	0.413412	4.34923	1.36618e-05	0.000116264
A930003O13Rik	70.1284	0.659496	4.34919	1.36639e-05	0.000116264
4930529M08Rik	817.346	0.429765	4.33945	1.42843e-05	0.000121114
Mcmdc2	52.1615	0.409527	4.32752	1.50797e-05	0.000126813
Hsbp1l1	340.694	-0.453058	-4.32321	1.53774e-05	0.000129065
Retnlg	11.1547	-0.909209	-4.31628	1.5868e-05	0.00013277
Selenbp1	295.537	-0.36369	-4.31113	1.62421e-05	0.000135605
Osbp2	507.487	-0.449955	-4.30199	1.69268e-05	0.000140595
Adrb2	238.906	0.474419	4.29892	1.71632e-05	0.000142285
Marcks	1096.01	0.335738	4.29532	1.74442e-05	0.000144227
Adgrv1	122.171	-0.380974	-4.29332	1.7602e-05	0.000145254
Sox13	691.17	-0.405639	-4.29235	1.76795e-05	0.000145782
Slc29a4	508.203	0.414394	4.29202	1.77052e-05	0.000145938
Car12	221.921	0.820221	4.29122	1.77692e-05	0.000146409
Cdh1	457.778	0.354379	4.28729	1.80865e-05	0.00014874
Prkce	3070.26	0.3668	4.28574	1.82132e-05	0.000149668
Sfmbt2	108.004	-0.34906	-4.28229	1.84981e-05	0.000151771
Rps6kl1	411.32	0.345835	4.28009	1.86821e-05	0.000152998
AW495222	25.4115	-0.505999	-4.27781	1.88742e-05	0.000154347
Bag3	1257.97	0.451937	4.27508	1.91071e-05	0.000155829
Mgmt	71.3742	-0.425514	-4.27414	1.91877e-05	0.000156227
Coro2a	83.293	-0.671054	-4.27409	1.91921e-05	0.000156227
Rab9b	381.573	0.341731	4.27215	1.93597e-05	0.000157444
Ciart	284.257	-0.526447	-4.27204	1.9369e-05	0.000157444
Stc2	259.527	-0.659983	-4.27079	1.94785e-05	0.000158022
Fancd2	75.8754	-0.387075	-4.26987	1.95584e-05	0.000158611
Paqr9	142.179	-0.423711	-4.26143	2.0312e-05	0.000164291
Cish	1089.74	-0.32329	-4.26135	2.03198e-05	0.000164293
Isl1	443.88	-0.331245	-4.2608	2.03693e-05	0.000164569
Fgf21	21.1134	-0.841025	-4.25786	2.06397e-05	0.000166567
Gm25212	26.4206	0.803285	4.2558	2.08305e-05	0.000167856
1700112E06Rik	105.78	-0.329478	-4.25248	2.11419e-05	0.000169985
Pcdhb4	223.366	0.445611	4.25198	2.1189e-05	0.000170237
Nusap1	89.5381	-0.39608	-4.25006	2.13709e-05	0.000171635
Gm13807	26.4636	-0.496886	-4.24895	2.14777e-05	0.000172357
Pygm	464.931	0.47053	4.24887	2.14848e-05	0.000172357
Sdk1	1146.92	0.357677	4.248	2.15689e-05	0.000172968
Gm25018	12.5015	0.795766	4.24635	2.17283e-05	0.000173988
Tnfsf13b	56.0832	-0.422873	-4.24614	2.17481e-05	0.000174017
Nrip2	162.429	-0.408435	-4.24327	2.20287e-05	0.000175806
Hhatl	99.7748	0.508992	4.23445	2.29111e-05	0.000182243
AK138949	1402.74	0.46108	4.23012	2.33571e-05	0.000185585
Gm2506	8.39093	-0.78906	-4.22866	2.35084e-05	0.000186581
Stat4	59.1147	-0.756409	-4.22624	2.37624e-05	0.000188321
Ascl4	37.4856	-0.650423	-4.22382	2.40198e-05	0.000190202
Pcdhga9	160.98	0.433316	4.22145	2.42736e-05	0.00019195
Galnt18	459.74	-0.357427	-4.22011	2.44178e-05	0.000193019
Gabbr2	131.828	-0.514185	-4.2197	2.44625e-05	0.000193232
Slc43a1	318.781	-0.543612	-4.21776	2.46738e-05	0.000194616
AK161964	559.603	-0.503814	-4.21601	2.48663e-05	0.000195735
Kcnu1	142.201	0.361786	4.21594	2.48741e-05	0.000195735
AK044378	97.7724	-0.351366	-4.21584	2.48848e-05	0.000195735
Mfsd9	86.9298	-0.327004	-4.20493	2.61163e-05	0.000204278
Hs3st1	189.975	0.423359	4.19727	2.70155e-05	0.000210549
Hdac4	345.794	0.326387	4.19598	2.71691e-05	0.000211594
Papln	211.358	-0.325132	-4.19016	2.78752e-05	0.000216469
AI854703	156.474	0.350141	4.18423	2.8614e-05	0.000221489
Papss2	173.655	-0.352221	-4.18349	2.87064e-05	0.000221966
AK006245	68.8903	0.358466	4.18087	2.90398e-05	0.000224303
Insig1	3163.71	-0.352804	-4.17705	2.95311e-05	0.000227772
C4a	88.7019	-0.376906	-4.17539	2.97477e-05	0.000229361
4930519K11Rik	16.9178	-0.63559	-4.17339	3.00096e-05	0.000230977
2210039B01Rik	24.374	-0.568174	-4.17332	3.00193e-05	0.000230977
Tubb2a	2608.07	0.37418	4.17212	3.01781e-05	0.000231934
Selenbp2	72.6356	-0.527425	-4.16852	3.06585e-05	0.000235208
Nr3c1	2475.82	-0.328666	-4.16776	3.07609e-05	0.00023591
Klf5	126.734	0.419743	4.16063	3.17368e-05	0.000242705
Mcoln3	124.023	-0.420427	-4.15838	3.20517e-05	0.00024494
Scn4a	143.164	-0.595462	-4.15445	3.2607e-05	0.000249007
AK044689	91.3354	0.348084	4.15201	3.29567e-05	0.000251411
Clec3b	23.5886	0.647807	4.15118	3.30762e-05	0.000252234
Pgpep1l	84.4379	-0.397099	-4.14978	3.32798e-05	0.000253607
Slc35d2	110.762	-0.419579	-4.14713	3.36667e-05	0.000256375
A930018M24Rik_	188.837	-0.458756	-4.14062	3.46366e-05	0.000263096
Ube2c	33.9068	-0.646362	-4.14055	3.46467e-05	0.000263096
AY672066	32.6057	-0.53702	-4.13746	3.51171e-05	0.000266293
Ttll11	215.107	-0.374861	-4.13511	3.54792e-05	0.000268662
Gbp6	411.938	-0.344873	-4.13431	3.5603e-05	0.000269505
Ngb	258.906	-0.673056	-4.13391	3.56647e-05	0.000269878
Sigirr	172.277	-0.360077	-4.1227	3.74453e-05	0.000282264
Actn2	529.592	-0.457064	-4.12228	3.75145e-05	0.000282687
Col20a1	349.279	-0.406955	-4.12029	3.78399e-05	0.000284741
Mycn	320.66	0.467355	4.11974	3.793e-05	0.000285221
Camk2a	839.692	0.51994	4.11577	3.85891e-05	0.000289673
Mak	201.023	-0.352459	-4.11459	3.87871e-05	0.000290957
Tmcc3	931.003	0.477696	4.11287	3.90779e-05	0.000292935
Ckb	7515.1	0.339018	4.11007	3.95534e-05	0.000296191
Gbp8	202.8	0.405264	4.10792	3.99246e-05	0.00029866
Cgref1	450.248	0.576008	4.10752	3.99925e-05	0.000299065
B3galt5	165.938	-0.495469	-4.1026	4.08532e-05	0.000305057
AK086006	11.7555	0.673513	4.10239	4.08896e-05	0.000305139
Hist2h3b	110.533	0.59963	4.10119	4.11034e-05	0.000306629
9330159M07Rik	137.255	-0.345357	-4.10058	4.1211e-05	0.000307326
Lrrc17	499.795	0.375386	4.09803	4.16681e-05	0.000310413
2700038G22Rik	119.819	0.48239	4.09592	4.20491e-05	0.000312927
Ccdc113	267.426	0.351257	4.09355	4.24826e-05	0.000315719
AK045483	79.4371	0.785001	4.08765	4.35757e-05	0.000323397
Cdh18	429.549	-0.387758	-4.08589	4.39073e-05	0.000325411
Mif	1251.07	0.455974	4.08383	4.42991e-05	0.00032809
AK134715	132.307	-0.387075	-4.08234	4.45853e-05	0.000329983
Shcbp1l	66.852	-0.496107	-4.08007	4.50212e-05	0.000332753
Foxo6	462.157	0.3294	4.07558	4.59e-05	0.000338197
Cebpd	961.232	-0.395876	-4.07208	4.65955e-05	0.000342398
Hipk2	559.318	0.338325	4.07179	4.66538e-05	0.000342709
Sbk2	102.011	-0.354134	-4.0673	4.75616e-05	0.000348548
AK133807	92.4985	-0.383186	-4.0661	4.78059e-05	0.00035022
Slc25a43	44.7627	-0.509368	-4.06342	4.83594e-05	0.000354035
Kcnk5	115.848	0.517387	4.06043	4.89816e-05	0.000358347
Map3k15	145.707	-0.442699	-4.05761	4.95774e-05	0.000361726
Snhg6	169.162	0.368179	4.05533	5.00642e-05	0.000364908
AW011738	60.9497	-0.488447	-4.05054	5.10985e-05	0.000372196
A230070E04Rik	39.1832	-0.429556	-4.04264	5.28519e-05	0.00038303
Ccl19	424.81	-0.421991	-4.04193	5.30131e-05	0.00038407
Col17a1	228.685	-0.420193	-4.04112	5.3196e-05	0.000385137
Gm3985	131.971	-0.431244	-4.04004	5.34412e-05	0.000386523
Ppp1r3c	250.773	-0.452326	-4.03097	5.55476e-05	0.000400684
Scx	298.022	-0.411118	-4.02707	5.64757e-05	0.000406565
Ltf	54.8874	-0.930687	-4.02185	5.77428e-05	0.000415133
Nmu	59.9108	0.506346	4.02136	5.78626e-05	0.000415856
Pprc1	1272.6	0.347701	4.01554	5.93097e-05	0.000424421
Sv2c	85.709	-0.352994	-4.01416	5.96576e-05	0.000426487
Sh2d4a	134.237	0.328252	4.00726	6.14276e-05	0.000438415
Car13	109.282	0.534604	4.0049	6.20443e-05	0.000442086
Slc4a11	64.1348	-0.58191	-3.99817	6.38349e-05	0.000454245
Pik3cd	292.727	0.35173	3.99685	6.41921e-05	0.000456637
Nrxn2	1258.96	0.437907	3.99188	6.55517e-05	0.000464778
Dynlrb2	310.284	-0.417717	-3.98841	6.6517e-05	0.000471004
Serpina3g	86.0873	-0.482889	-3.98552	6.73338e-05	0.000476164
Cit	143.919	0.410641	3.9853	6.73961e-05	0.000476405
Dusp10	315.219	-0.436865	-3.98082	6.86779e-05	0.000483926
Gabrg1	99.0651	0.514851	3.97899	6.92096e-05	0.000487355
Dhcr24	788.048	0.386064	3.97889	6.92373e-05	0.000487391
Ahcyl2	2200.9	0.330542	3.97457	7.05079e-05	0.000495366
Map3k6	105.504	-0.397372	-3.97105	7.15558e-05	0.000502239
Prc1	146.225	-0.341877	-3.96538	7.32789e-05	0.000512501
Fstl4	100.89	0.340799	3.96247	7.41783e-05	0.000517844
Espn	321.94	0.496654	3.96244	7.41867e-05	0.000517844
1700026L06Rik	38.3415	-0.430916	-3.9578	7.56427e-05	0.000527326
B230112J18Rik	13.886	0.661011	3.95771	7.56732e-05	0.000527369
4930593A02Rik	42.1215	0.448101	3.95493	7.6556e-05	0.000532834
Fam92b	504.506	-0.338477	-3.95467	7.66411e-05	0.000533254
Hist1h4i	229.24	0.36533	3.94966	7.82629e-05	0.000543139
Fzd5	927.433	-0.350852	-3.94266	8.0582e-05	0.000557621
Hpn	80.5774	0.333579	3.94215	8.07532e-05	0.000558627
AK015900	72.153	-0.683144	-3.92672	8.61129e-05	0.000590786
D17H6S56E-5	295.277	-0.344685	-3.92394	8.71137e-05	0.000596515
Hist2h3c1	3728.43	0.391985	3.92222	8.77364e-05	0.000600398
Gli3	182.219	0.48871	3.92173	8.79159e-05	0.000601246
2900041M22Rik	47.5683	-0.503384	-3.92023	8.84636e-05	0.000604418
Kansl1l	1020.3	-0.354768	-3.91621	8.99529e-05	0.00061401
Dgkh	309.876	-0.330965	-3.91323	9.10693e-05	0.000619673
Ppargc1b	73.6117	0.41482	3.91269	9.12754e-05	0.000620684
Ccdc65	128.174	-0.346723	-3.91077	9.20031e-05	0.000624846
Tmem140	243.716	-0.368934	-3.90854	9.2856e-05	0.000629846
Agap2	1129.36	0.365697	3.90791	9.30975e-05	0.000631286
9530052E02Rik	34.5812	-0.448987	-3.90741	9.32913e-05	0.000632402
Sh2d6_	27.4382	-0.564327	-3.90461	9.43774e-05	0.000639564
Ccrn4l	984.996	-0.36031	-3.90426	9.45123e-05	0.000640277
Pirb	78.7503	-0.42121	-3.89871	9.67055e-05	0.0006537
Cd14	96.7166	0.324167	3.8965	9.75914e-05	0.00065907
BC023202	144.6	-0.420294	-3.88778	0.000101165	0.000680865
Mrc2	707.516	0.324591	3.88731	0.000101361	0.00068197
Bcl11a	286.088	0.343863	3.8849	0.000102371	0.000688242
Gbp3	565.689	-0.348939	-3.88014	0.000104396	0.000700861
Ajuba	178.573	0.366226	3.87854	0.000105084	0.000705043
3110009E18Rik	80.7989	-0.427066	-3.87748	0.000105545	0.000707694
Sidt1	120.142	0.389046	3.87649	0.000105975	0.000709699
Aqp11	183.139	-0.423656	-3.87365	0.000107219	0.000716326
Egr2	128.842	-0.579969	-3.87362	0.00010723	0.000716326
Gm11974	152.136	0.504664	3.87127	0.000108271	0.000722161
Iqcg	165.181	-0.324028	-3.87032	0.000108694	0.000724312
Ncmap	36.9631	-0.492618	-3.86684	0.000110255	0.000733586
AK163121	86.4692	-0.367181	-3.86676	0.000110292	0.000733604
Cbs	135.531	-0.385128	-3.85781	0.000114407	0.000758643
Myo1e	964.877	-0.323601	-3.85748	0.00011456	0.000759423
Fam111a	95.481	-0.32518	-3.85721	0.00011469	0.000760051
Pnma3	129.578	-0.477413	-3.8528	0.000116773	0.00077243
Zbtb16	495.647	-0.570888	-3.84338	0.000121353	0.000799789
AK140147	76.1751	-0.51136	-3.84081	0.000122628	0.000806282
Camk2b	4888.91	0.36203	3.84079	0.000122637	0.000806282
Trpc5	93.5741	-0.457162	-3.83506	0.000125534	0.000822075
Tmem27	25.7778	0.569936	3.83257	0.000126813	0.000830055
Chil6	129.381	0.514714	3.83254	0.000126829	0.000830055
Chst1	386.174	-0.402428	-3.83245	0.000126874	0.000830097
Ifi44	119.954	0.446376	3.82974	0.000128279	0.00083853
Rtn4rl2	63.1414	-0.554242	-3.82548	0.000130516	0.000851603
Scarf2	244.583	0.326703	3.82481	0.000130871	0.000853665
Nptx2	281.845	0.547269	3.8244	0.00013109	0.000854837
Casp3	430.987	0.332172	3.82257	0.000132067	0.000860944
AK018074	69.6799	-0.326024	-3.8177	0.000134704	0.00087444
Mrln	80.5388	0.413013	3.8158	0.000135742	0.00088039
Heg1	1608.81	0.428573	3.81502	0.000136171	0.000882637
Hal	135.963	0.528375	3.81338	0.000137079	0.000887196
Pelo	373.466	0.342583	3.81314	0.000137213	0.000887796
Akap6	144.969	0.578216	3.80898	0.000139541	0.000901239
Dync1i1	511.513	-0.360266	-3.80672	0.000140824	0.000907623
Pgam2	26.2981	0.485958	3.80082	0.000144215	0.000926597
Prr22	53.2671	-0.407571	-3.79548	0.000147359	0.000943831
1700016K19Rik	30.3109	-0.528388	-3.79126	0.000149885	0.000958021
Zcchc16	90.4011	-0.337271	-3.78742	0.000152222	0.000971235
Ccnf	75.3019	0.397527	3.78607	0.00015305	0.000975942
Lrrc4c	224.183	0.402349	3.78385	0.000154421	0.000982653
Rasd2	307.171	0.491837	3.78223	0.000155427	0.000988181
Acp5	38.5881	0.694149	3.77817	0.000157988	0.00100299
Hrk	141.031	-0.348036	-3.77802	0.000158081	0.00100329
Neto2	385.57	-0.387606	-3.77703	0.000158707	0.00100696
Nsun7	116.259	-0.332342	-3.77597	0.000159383	0.00101095
Stom	433.2	0.343961	3.77548	0.000159697	0.00101265
Gpm6a	2105.1	0.348249	3.77224	0.000161787	0.0010253
Grwd1	431.43	0.33809	3.7713	0.000162398	0.00102844
Arl5c	55.5082	0.435149	3.76577	0.000166039	0.00104856
Stra6	147.447	0.591909	3.76256	0.00016818	0.00106115
Aff2	115.537	0.520983	3.75432	0.000173815	0.00109192
AK045688	35.1608	-0.589809	-3.75369	0.000174253	0.00109393
Cd79a	49.589	-0.472897	-3.75126	0.000175951	0.00110245
Cda	51.8774	0.477863	3.75048	0.000176495	0.00110522
Kcnj8	208.538	-0.383414	-3.74748	0.000178621	0.001116
AK163166	63.5406	-0.446684	-3.74615	0.000179572	0.00112059
2900057B20Rik	34.9204	-0.556978	-3.74528	0.000180191	0.00112412
Zc3h12a	85.6833	-0.469364	-3.74269	0.000182061	0.00113448
Entpd2	132.599	0.357065	3.74199	0.000182572	0.00113701
Adam8	234.5	-0.334765	-3.74172	0.000182766	0.00113789
Six3	2289.33	0.361501	3.74139	0.000183007	0.00113906
Rtn4r	66.8561	-0.659432	-3.73919	0.000184618	0.00114743
Gpha2	36.5919	-0.499988	-3.73594	0.000187015	0.00116067
Mpzl3	66.6427	-0.337616	-3.72835	0.00019274	0.00119072
Gm5860	22.2996	0.511769	3.72517	0.000195185	0.00120411
Ptn	2744.04	-0.414535	-3.7232	0.00019671	0.00121317
Socs1	114.831	0.630582	3.7217	0.000197885	0.00121867
Cxcl13	34.3346	-0.519871	-3.71289	0.000204906	0.00125618
Ceacam10	324.54	-0.541211	-3.71017	0.00020712	0.00126724
Celsr1	470.697	0.328683	3.70987	0.00020737	0.00126841
Gm12409	23.0185	-0.555347	-3.70574	0.000210776	0.00128669
Vgll1	49.631	-0.544795	-3.7	0.000215602	0.00131318
Gad2	1091.54	0.433879	3.69794	0.000217354	0.00132237
Myh7	233.754	0.338758	3.68888	0.000225247	0.00136445
Ddc	129.315	-0.339207	-3.68299	0.000230511	0.00139261
D030047H15Rik	122.395	-0.511854	-3.68255	0.000230913	0.00139426
Slc38a3	364.468	0.691377	3.67994	0.000233288	0.00140702
AK042445	51.651	-0.421184	-3.67509	0.000237765	0.00143003
Gch1	244.64	-0.385414	-3.67089	0.000241707	0.00145172
Camk1g	295.606	0.371851	3.6645	0.000247825	0.00148434
Rin3	84.0898	0.35128	3.66074	0.000251487	0.00150419
Pdgfd	378.07	-0.329072	-3.65363	0.000258562	0.00154352
Chpt1	811.646	0.357972	3.65323	0.000258965	0.00154549
Ncdn	1759.33	0.376098	3.65303	0.000259169	0.00154628
BC002288	38.2551	-0.490116	-3.64427	0.000268149	0.00159195
Cyyr1	57.3012	-0.43927	-3.6426	0.0002699	0.00160146
Ccna2	135.904	-0.346765	-3.63789	0.000274877	0.00162697
Chga	56047.1	-0.346651	-3.63568	0.000277246	0.0016383
1110046J04Rik	68.6873	-0.352251	-3.63048	0.000282891	0.00166755
Hmcn2	119.609	0.476537	3.62991	0.000283525	0.00167038
4930511M06Rik	92.7336	-0.33188	-3.62607	0.000287764	0.00169166
Gm19522	66.0378	0.346127	3.62109	0.000293364	0.0017171
Bmp7	287.392	0.435041	3.6145	0.000300931	0.00175663
AK030561	674.027	0.45722	3.61313	0.00030252	0.00176353
Ddx60	213.598	-0.338189	-3.61221	0.000303602	0.00176898
Nlgn1	95.263	0.403907	3.61067	0.000305407	0.00177748
1810008I18Rik	54.7134	-0.43517	-3.6089	0.000307496	0.00178723
Ccdc74a	90.3887	-0.366436	-3.60745	0.000309226	0.00179536
Mab21l1	77.1737	0.490189	3.60577	0.000311223	0.0018055
Pir	96.421	0.369899	3.60456	0.000312676	0.00181238
Pfkfb1	76.9627	-0.411224	-3.59857	0.000319972	0.00184979
Cenpa	52.6215	-0.439186	-3.59509	0.000324283	0.00187071
Fgfr4	50.0128	0.507861	3.59424	0.000325345	0.00187534
Ide	2846.2	0.339417	3.59378	0.000325913	0.00187761
Gal	586.865	0.878558	3.58875	0.000332273	0.00191119
Oit1	91.5339	0.384187	3.58819	0.000332979	0.00191474
Fmod	102.888	0.643465	3.58617	0.000335575	0.0019271
Sbk1	393.758	0.376122	3.58442	0.000337832	0.00193697
6430710C18Rik	32.5741	-0.543737	-3.58223	0.000340671	0.00194809
Fgfbp3	275.16	0.37647	3.58038	0.000343088	0.00196035
Dpysl4	399.474	0.328309	3.58018	0.000343353	0.0019606
A530058N18Rik	70.0843	0.376546	3.57075	0.000355967	0.00202697
1700020D05Rik	39.0144	-0.386024	-3.56509	0.00036373	0.0020651
2810459M11Rik	65.2899	0.565518	3.56503	0.000363811	0.0020651
Lrrc4b	385.07	0.404738	3.56012	0.000370691	0.00209974
Amy1	230.624	0.3535	3.55937	0.000371739	0.00210347
Lrrn4cl	187.158	0.359755	3.55843	0.000373079	0.00210884
Hcn2	439.899	0.33522	3.55745	0.000374476	0.00211563
Adm2	32.1361	-0.637997	-3.55356	0.000380061	0.00214438
AK030777	43.1792	-0.461798	-3.54927	0.0003863	0.00217447
Adcy1	282.847	0.424356	3.54836	0.000387633	0.00218084
Erdr1	4586.99	0.668398	3.54529	0.000392176	0.00220353
Spag6	127.477	-0.330178	-3.53978	0.000400458	0.00224656
Ube2t	50.4351	-0.421295	-3.5369	0.000404853	0.00226709
Pinx1	128.141	0.338965	3.53162	0.00041303	0.00230869
Bmp3	149.766	-0.415809	-3.5302	0.000415238	0.00231984
AK044300	67.7438	-0.336017	-3.52829	0.000418252	0.00233426
AK163099	39.931	0.427908	3.52818	0.000418429	0.00233464
Fgfr2	435.518	0.327787	3.52115	0.00042968	0.00239309
Kcnc1	512.805	0.384822	3.51861	0.000433819	0.00241366
Drd2	4212.73	0.349604	3.51774	0.000435239	0.00242094
Acacb	1039.29	-0.415691	-3.51562	0.00043873	0.00243784
Sox9	312.642	0.351868	3.51407	0.000441303	0.00245088
Atp1b3	1785.1	0.479802	3.51275	0.000443487	0.00246174
Vwa5b2	311.379	0.392535	3.51055	0.000447173	0.00248029
Foxj1	182.117	0.481934	3.51022	0.000447732	0.00248275
Gm684	28.1574	-0.490083	-3.50843	0.000450764	0.00249893
Cep72	111.559	0.340602	3.50759	0.000452193	0.00250363
3110045C21Rik	23.5148	-0.479473	-3.49955	0.000466048	0.00257506
Uts2	21.7786	-0.525983	-3.49471	0.000474571	0.00261613
AK082064	303.451	-0.385264	-3.49464	0.000474706	0.00261621
H2afy3	45.2179	0.361199	3.49369	0.000476387	0.0026228
Esm1	2966.12	0.523662	3.49263	0.000478289	0.00263059
Gm19345	31.3601	-0.502678	-3.49253	0.000478468	0.0026309
AK021191	23.4163	-0.500943	-3.48866	0.000485447	0.00266182
Dusp8	1022.04	0.48824	3.48793	0.000486785	0.00266578
Trim47	156.763	-0.376021	-3.48265	0.000496486	0.00271256
Ctps	873.524	0.353603	3.47483	0.000511185	0.0027767
Kirrel3	372.547	0.363521	3.47478	0.000511282	0.0027767
Maf	217.53	0.334872	3.4745	0.000511801	0.00277883
Igfbp4	1492.88	0.381639	3.4744	0.000511994	0.00277918
Col14a1	166.973	0.333114	3.47409	0.000512583	0.00278167
Neurod1	181.296	0.403339	3.47148	0.000517589	0.00280532
Nov	336.922	-0.485824	-3.46069	0.000538802	0.00290354
Cd24a	3667.48	0.339492	3.46042	0.000539329	0.0029042
Dcst1	34.5516	-0.429754	-3.45746	0.000545302	0.00293053
Chrm1	147.79	0.349939	3.45522	0.000549853	0.00295204
Cpne5	349.166	0.323492	3.45307	0.000554245	0.00297193
AK086911	76.1788	-0.418999	-3.4518	0.00055685	0.00298442
2810408I11Rik	22.2247	-0.475904	-3.45147	0.000557546	0.00298741
Zfp879	149.856	-0.386338	-3.44966	0.0005613	0.00300603
Bpifb4	52.1207	0.623584	3.4476	0.000565595	0.00302528
Kcnh1	566.935	0.416424	3.43108	0.000601173	0.00319109
Ybx2	57.7415	-0.383407	-3.42882	0.000606205	0.00321386
Syt6	565.195	0.396961	3.42814	0.000607741	0.00321996
Ngef	219.954	0.44553	3.42667	0.000611039	0.00323392
Nr0b1	208.916	0.412751	3.4229	0.000619558	0.003271
Bpifa1	186.508	-0.507166	-3.42148	0.000622809	0.00328736
Myrip	522.579	0.329322	3.41879	0.000628999	0.00331713
AK016097	21.3608	-0.43406	-3.41441	0.000639212	0.00336326
Snai3	37.0041	-0.491006	-3.40643	0.000658189	0.00345302
AK090163	42.1055	-0.339947	-3.4063	0.000658506	0.00345384
Gm6194	36.7532	0.371787	3.40616	0.000658846	0.00345478
Gpt2	686.479	-0.563648	-3.40441	0.000663069	0.00347294
Cpne2	213.464	0.379026	3.40393	0.000664243	0.00347802
AK047145	130.008	-0.480095	-3.40247	0.000667792	0.00349576
Top2a	137.147	-0.53645	-3.39856	0.000677428	0.00353934
Plekhh2	292.452	0.336729	3.39567	0.000684617	0.00357344
Ankrd2	37.7991	-0.405968	-3.39491	0.000686516	0.00358248
Klf2	178.948	0.360416	3.38782	0.000704517	0.00366548
Timp4	50.5795	-0.471479	-3.3822	0.000719088	0.00372904
AK040602	63.0244	-0.329836	-3.37886	0.00072788	0.0037656
Ppapdc1a	28.8543	-0.574812	-3.37663	0.000733785	0.00379251
AK042028	40.6024	-0.364674	-3.3693	0.000753595	0.0038819
Nos1ap	104.698	0.332028	3.36507	0.000765248	0.00392881
A830011K09Rik	90.0116	0.364324	3.36263	0.000772051	0.00395945
Txnip	9762.21	0.359487	3.35835	0.000784093	0.00401411
Aif1l	80.5634	-0.369994	-3.35816	0.000784626	0.00401589
EF651814	56.2975	0.497615	3.35434	0.000795532	0.00406016
Kit	765.491	0.354736	3.34644	0.000818561	0.00416785
Fzd9	46.5465	-0.455353	-3.34333	0.000827799	0.00420795
Wnt10a	407.526	-0.479475	-3.33733	0.000845886	0.00428778
Pifo	62.7649	-0.36826	-3.33442	0.000854775	0.00432878
Fscn1	370.13	-0.410374	-3.33042	0.000867143	0.00438011
Rasl10a	27.3779	-0.462455	-3.33002	0.000868393	0.00438541
Hs6st3	66.8908	0.496465	3.32952	0.000869959	0.00439229
Egr3	191.385	0.540398	3.32533	0.000883149	0.0044516
Cspg5	344.789	0.439407	3.32055	0.000898407	0.00451902
Lypd2	30.6183	0.548704	3.31592	0.000913433	0.00458499
Snhg9	23.7299	0.404355	3.31557	0.000914563	0.0045896
Gprc5a	117.674	0.380602	3.31049	0.000931319	0.00466178
Tmem45a	539.122	0.409148	3.30616	0.000945855	0.00472578
H19	121.117	0.506234	3.30435	0.000951969	0.00475412
AK183986	79.9127	0.508331	3.30126	0.000962509	0.00479678
Calca	30.4887	-0.413178	-3.30082	0.000964025	0.00480323
Slc7a5	719.001	0.405228	3.29949	0.000968618	0.00482166
Kctd12	1149.02	0.477319	3.29617	0.000980126	0.00486904
Astn1	615.414	0.331867	3.29428	0.000986732	0.00489717
Slc26a1	80.412	-0.451876	-3.28903	0.00100535	0.00497926
Scgn	80.7061	-0.534409	-3.28776	0.00100988	0.00499828
Mkln1os	29.3471	-0.468923	-3.28586	0.00101672	0.00502869
Epsti1	37.9339	0.436959	3.28209	0.00103041	0.00508707
Col12a1	257.636	0.410691	3.28067	0.00103561	0.00510572
Itgb8	187.986	-0.331013	-3.27643	0.00105128	0.00516885
Spdya	56.1372	-0.328157	-3.26964	0.00107685	0.00527297
G530011O06Rik	134.396	0.557835	3.26046	0.0011123	0.00543421
AK133405	54.9716	0.598934	3.25994	0.00111436	0.00544304
EF651841	22.0274	0.475751	3.25618	0.00112922	0.00551065
Vps37b	881.899	0.347783	3.25603	0.00112984	0.00551242
Olfr330	51.2669	-0.36786	-3.24318	0.00118205	0.00572708
AK017143	91.6227	-0.322061	-3.24194	0.0011872	0.00574813
Rcan1	753.632	0.356072	3.24001	0.00119524	0.00577802
Gm266	150.64	-0.334841	-3.23724	0.00120692	0.00582795
Nppc	63.1529	0.360782	3.23418	0.00121994	0.00588428
Cldn10	249.563	-0.379383	-3.2301	0.00123747	0.00594887
Arhgdig	96.8246	-0.417458	-3.22429	0.00126287	0.00606155
Fev	78.146	0.440396	3.22365	0.00126567	0.00607229
Gulo	1298.89	0.455854	3.2174	0.0012936	0.00618844
Gpr12	152.749	-0.397323	-3.21651	0.00129758	0.0062061
Rnf213_	47.5786	-0.375151	-3.21128	0.00132143	0.00631317
Smoc2	188.873	0.32762	3.20499	0.00135068	0.00643443
Ifi27l2a	193.951	0.404429	3.20114	0.00136885	0.00651095
Erbb4	91.6079	0.383599	3.19732	0.00138712	0.00657753
Cldn14	25.9417	-0.49849	-3.19041	0.00142073	0.00671042
Trpv4	253.462	0.434081	3.19003	0.00142258	0.00671474
Epn3	173.401	0.348455	3.1892	0.00142665	0.00673087
Gm19705	9.59099	-0.558964	-3.18726	0.00143627	0.00676608
Map3k19	219.097	-0.391216	-3.18423	0.00145139	0.00682538
Igsf11	122.736	-0.363549	-3.18316	0.00145678	0.00684479
Odf3b	65.68	0.359245	3.18193	0.00146295	0.00686452
DQ552508	49.5876	0.380034	3.18105	0.00146744	0.00688287
H2-DMb1	178.409	0.332266	3.17655	0.00149038	0.00697687
Fbll1	39.523	0.51338	3.17549	0.00149586	0.00699645
Hoga1	48.811	-0.373576	-3.17094	0.00151947	0.00708873
AK007899	26.2769	-0.425809	-3.17034	0.00152261	0.0070985
Cdca3	90.5129	-0.378936	-3.16459	0.00155304	0.00722322
Ppp1r17	221.211	0.445143	3.16235	0.00156501	0.00727265
Alk	182.88	-0.544564	-3.1579	0.00158913	0.00737043
4930505A04Rik	52.6901	0.334455	3.15311	0.00161541	0.00747469
Prmt8	96.8328	-0.392869	-3.15264	0.00161801	0.00748511
Eppk1	874.842	-0.391969	-3.15012	0.00163205	0.00753903
Xlr4a	29.771	-0.592615	-3.15011	0.00163211	0.00753903
Rnf43	407.243	0.328245	3.14419	0.00166548	0.00766697
Cabp1	402.214	-0.322188	-3.13852	0.00169805	0.00778868
Gckr	50.8631	0.526577	3.13202	0.00173608	0.00794456
AK047723	47.1891	-0.419373	-3.13054	0.00174485	0.00797961
Dlx3	64.2003	-0.49424	-3.12954	0.00175083	0.00800508
Snora61	44.2136	0.392686	3.1264	0.00176962	0.00807241
Gpm6b	1401.23	0.372685	3.11159	0.00186084	0.00843686
Slc13a4	96.9087	0.764558	3.10356	0.0019121	0.00863483
0610040J01Rik	186.637	0.362979	3.10233	0.00192001	0.00866331
AK040553	8.28648	-0.549322	-3.10203	0.00192199	0.00866862
Gcnt2	720.387	-0.392309	-3.09927	0.00193999	0.00874001
Ptgds	3941.04	0.812529	3.09035	0.00199924	0.00895719
Sema3e	757.023	0.355444	3.08879	0.0020097	0.00899785
Wnt5b	255.394	0.357774	3.08433	0.0020401	0.00912136
Agpat9	211.094	-0.338336	-3.08241	0.00205335	0.00916352
Abcb1a	195.417	0.38072	3.07898	0.0020771	0.00925613
Cdh22	153.743	0.395146	3.07727	0.00208909	0.00929614
Snord57	7.10105	0.586728	3.06849	0.00215141	0.00953807
Pax7	1761.65	0.46811	3.06671	0.00216429	0.00958732
Mdga2	177.362	0.368431	3.06484	0.00217785	0.00963947
Irs2	1287.16	0.327979	3.05547	0.00224709	0.00991549
Celf5	263.878	0.362156	3.04346	0.00233877	0.0102676
Srpx2	65.6409	-0.365091	-3.03751	0.00238543	0.0104258
AK038087	42.0095	-0.397706	-3.03751	0.00238543	0.0104258
Vpreb3	20.3635	-0.426897	-3.03201	0.00242928	0.0105747
Gm6277	94.7319	-0.356086	-3.01447	0.00257429	0.0110897
Btbd8	37.4925	-0.336828	-3.01412	0.00257723	0.0111002
Rassf2	355.562	0.328461	3.01077	0.00260586	0.0112078
Snord12	22.8973	0.468439	3.00977	0.00261448	0.0112365
Pnpla3	725.459	-0.392424	-3.00493	0.0026564	0.0113935
Jph2	106.172	-0.408851	-3.00127	0.00268858	0.0115178
AK147021	35.4023	-0.447264	-2.99945	0.00270464	0.0115751
Dusp5	112.927	0.337364	2.99772	0.00272005	0.0116387
Ube2ql1	163.663	0.493585	2.98775	0.00281041	0.0119709
Clrn1	68.0708	0.344839	2.98577	0.00282864	0.0120386
Slc16a8	39.592	0.4928	2.97909	0.00289105	0.0122563
Pemt	194.984	0.405236	2.97534	0.00292665	0.012383
AK007436	33.1213	-0.324028	-2.97105	0.00296784	0.0125249
Cap2	131.08	0.33978	2.96669	0.00301027	0.0126673
AK051222	56.036	-0.324283	-2.96614	0.00301568	0.0126802
Tmem144	58.4295	0.322515	2.964	0.00303667	0.0127511
Serpine3	33.1826	-0.446132	-2.9556	0.00312061	0.0130553
Cidea	1039.79	-0.376206	-2.94519	0.00322761	0.0134509
Pbld1	65.1107	-0.491568	-2.94392	0.00324079	0.0134954
Cd74	3564.55	0.350124	2.93615	0.00332318	0.0137959
Fam81a	148.072	-0.422394	-2.93111	0.00337748	0.0139971
Il1rapl2	122.447	0.380846	2.93027	0.00338667	0.0140245
AK039053	43.3647	0.370461	2.92597	0.00343383	0.0141953
Nbl1	359.549	0.4602	2.92426	0.00345279	0.0142618
Grip2	232.097	-0.451564	-2.92397	0.003456	0.0142678
Oxt	481.634	0.543267	2.92139	0.00348478	0.0143647
Cpm	354.991	-0.441408	-2.91576	0.0035482	0.0145871
Rasgef1a	266.205	-0.36162	-2.91414	0.0035667	0.0146539
Pbk	43.6124	-0.50799	-2.91014	0.00361267	0.0148043
Oxtr	119.571	0.611143	2.90775	0.00364038	0.0149065
AK148422	74.3688	0.3546	2.90762	0.00364194	0.0149073
Snord47	27.8252	0.416535	2.90551	0.00366652	0.0149852
Gpr160	40.4714	0.383944	2.90523	0.00366982	0.0149958
DQ697578	70.08	-0.338259	-2.89887	0.00374511	0.0152659
Cdc20	65.3916	-0.376536	-2.89626	0.00377643	0.0153849
Mir6935	9.60935	0.649811	2.89466	0.00379568	0.0154546
Prrg4	70.4463	-0.332634	-2.89454	0.00379713	0.0154575
Gm11128	32.6731	0.402093	2.88531	0.00391032	0.0158675
Bean1	152.964	0.384632	2.87991	0.00397785	0.0160901
DQ725680	1.89091	0.448069	2.87936	0.00398477	0.0161121
Midn	3539.68	0.331705	2.87561	0.00403251	0.0162838
Gucy1a3	359.032	0.375687	2.86622	0.00415407	0.0166998
Tnfrsf23	263.875	0.338354	2.86333	0.00419216	0.0168239
Elavl3	332.927	0.504974	2.85802	0.00426293	0.0170802
Ciita	91.0195	0.376246	2.85498	0.00430399	0.0172214
Gjb2	84.6877	0.468214	2.85323	0.00432777	0.0173047
AK013453	57.4202	-0.354355	-2.84578	0.00443025	0.0176654
Gm4951	42.9976	0.49716	2.84542	0.00443529	0.0176822
Slc6a13	43.1622	0.672026	2.84466	0.00444584	0.017721
Cartpt	46.1741	-0.330849	-2.84224	0.00447985	0.017835
Gm11665	91.2026	0.38031	2.8361	0.00456687	0.0181265
Gm16677	51.1292	-0.389514	-2.83289	0.0046129	0.018279
AK159035	35.9046	-0.326843	-2.82977	0.00465812	0.0184278
BC053974	48.1261	-0.346058	-2.82923	0.00466597	0.0184487
AK089118	22.2871	0.401942	2.8278	0.00468685	0.0185142
Prss28	180.439	-0.417631	-2.82498	0.0047283	0.018644
Ajap1	182.897	-0.324057	-2.81893	0.00481833	0.0189505
Tmem151b	140.648	0.325194	2.80987	0.00495608	0.0194075
Prima1	23.6478	-0.500984	-2.80675	0.00500436	0.0195492
Pak3	3215.82	0.339047	2.80672	0.00500493	0.0195492
AK076683	35.9196	0.324701	2.80557	0.00502276	0.0196046
Pou2f2	62.5924	0.330367	2.79645	0.00516671	0.0200866
Plxna4	431.758	0.473266	2.78866	0.00529259	0.0205059
Gem	1019.8	-0.408012	-2.7776	0.00547617	0.0211037
Iigp1	251.639	0.620572	2.76721	0.00565389	0.0216803
1700001C02Rik	47.4241	-0.421392	-2.7654	0.00568524	0.0217699
Chst9	48.19	0.394434	2.76279	0.00573089	0.0219033
AK089146	16.63	-0.426945	-2.76269	0.00573265	0.0219045
Gm4477	50.672	0.377628	2.75552	0.00585998	0.0223166
5330411J11Rik	36.2498	-0.398911	-2.75283	0.00590833	0.0224408
Tcea3	48.8896	0.372125	2.75191	0.00592495	0.0224763
AB349653	97.8342	0.32988	2.74914	0.00597517	0.0226271
Necab3	96.7568	0.338423	2.74711	0.00601236	0.022744
AK035979	58.4735	0.341935	2.74678	0.00601835	0.0227587
AB351889	96.3676	0.361755	2.7406	0.00613275	0.0231104
Slc1a1	137.062	0.390004	2.73954	0.00615246	0.0231726
Tcerg1l	382.564	-0.513292	-2.72879	0.00635675	0.0237968
Pcsk6	7728.3	0.431315	2.72795	0.00637301	0.0238494
Gm9895	29.7079	-0.353713	-2.72034	0.00652143	0.0243289
Xrra1	53.3417	-0.33275	-2.70892	0.00675022	0.0250527
Crabp2	107.975	0.3598	2.70604	0.00680907	0.0252494
Baalc	313.05	-0.376991	-2.70506	0.00682921	0.0253067
Shmt1	69.1425	-0.341614	-2.70357	0.00685997	0.0254033
Mir7240	1.44154	-0.45122	-2.70136	0.00690562	0.0255564
Gm11837	31.3035	-0.348226	-2.69296	0.00708201	0.0261092
4930557K07Rik	23.9019	-0.333984	-2.68994	0.00714651	0.0263155
Wfdc17	35.0105	-0.370312	-2.67797	0.00740689	0.0271264
Lrp2	160.822	0.375886	2.67469	0.00747975	0.0273469
AK144662	27.1048	0.349582	2.67173	0.00754608	0.0275522
Ccl5	26.732	0.46162	2.67173	0.00754613	0.0275522
Vgf	720.94	0.339824	2.64682	0.0081252	0.0292661
Slc6a20a	45.9839	0.682872	2.64623	0.00813951	0.0293028
Gdf10	66.4183	0.454449	2.62941	0.0085533	0.0305027
Colq	67.7517	0.408855	2.62406	0.0086888	0.0309043
Rab38	181.738	0.440238	2.62388	0.00869333	0.0309153
Ttn	994.456	-0.43244	-2.61205	0.00900001	0.0318752
Fxyd1	340.33	0.382061	2.60253	0.00925385	0.0326652
Zdhhc22	20.6191	0.347679	2.60213	0.00926459	0.0326886
BC082781	25.8456	-0.336081	-2.58714	0.00967775	0.0338698
Cacng6	103.097	-0.327497	-2.58362	0.00977688	0.0341448
Slc17a7	469.179	0.516422	2.57981	0.0098855	0.0344517
Kcnc2	102.92	0.460376	2.57919	0.00990316	0.0344966
Snord72	23.0014	0.373834	2.57576	0.010002	0.0347768
Sfrp1	89.1836	0.428239	2.57285	0.0100864	0.0350332
Spns2	60.7424	0.343497	2.56991	0.0101725	0.035304
DQ558014	1.87979	0.482668	2.56791	0.0102314	0.0354513
EF651816	38.7542	0.350323	2.56144	0.010424	0.0360205
Fosb	950.563	0.671739	2.56002	0.0104666	0.0361562
AW112010	66.3573	0.354951	2.55969	0.0104764	0.0361805
Gm10637	34.0907	-0.440871	-2.55901	0.0104971	0.0362267
Il20ra	58.2629	0.340021	2.55828	0.0105191	0.0362854
Stat5a	2493.44	0.513569	2.54877	0.0108103	0.0371475
DQ561039	1.29431	-0.432665	-2.54327	0.010982	0.0376476
Alas2	302.329	-0.434985	-2.54192	0.0110246	0.0377816
Cfc1	23.141	0.322977	2.54137	0.011042	0.0378293
Ntsr2	97.9437	-0.362984	-2.53215	0.0113366	0.0386546
Fam167a	282.477	-0.437421	-2.51537	0.0118908	0.0402395
Disc1	105.194	-0.331471	-2.51075	0.0120475	0.0406806
Gm15772	21.9085	0.389342	2.50649	0.0121938	0.0411038
Mir1930	3.20452	-0.395634	-2.5047	0.0122557	0.041261
Gm5129	13.4447	-0.439576	-2.49523	0.0125877	0.0422011
AK186966	3.45502	-0.435219	-2.49445	0.0126153	0.0422739
Gm10865	16.0022	-0.382199	-2.49273	0.0126767	0.0424468
H2-Eb2	332.412	-0.387055	-2.48906	0.0128081	0.0427346
Spc25	31.7421	-0.424605	-2.47471	0.0133343	0.0441695
Tcf7	40.2021	-0.343154	-2.46331	0.0137661	0.0453564
Jph4	124.187	0.347307	2.4557	0.0140609	0.0461379
E530001F21Rik	30.7025	-0.333533	-2.45292	0.0141702	0.046447
5830444B04Rik	85.7305	-0.366873	-2.45061	0.0142613	0.0467103
Tshb	11635.7	-0.331248	-2.44386	0.0145312	0.0474431
Snord49a	19.3307	0.365026	2.43757	0.0147864	0.0481237
AB335742	6.35424	0.481901	2.43576	0.0148607	0.0483147
Ccnb2	32.7445	-0.371182	-2.43194	0.0150184	0.0487026
Mir1949	5.90277	0.504958	2.43117	0.0150501	0.0487796
Ier2	919.662	0.374771	2.42642	0.0152488	0.0493091
Card11	51.8654	-0.322318	-2.42567	0.01528	0.0493692
Cd177	59.1203	-0.344531	-2.42519	0.0153004	0.0494222
