# Supplementary material for: Sleep Deprivation Alters the Pituitary Stress Transcriptome in Male and Female Mice
Source: PubMed Central journal article supplement (PMC6794367; doi:10.3389/fendo.2019.00676), 2019-10-09
Supplement: Table_1.pdf [file Table_1.pdf]

**Table s1: Primer sequences used for real-time qPCR**

| Gene              | Forward primer (5'–3') | Reverse primer (5'–3') | Acc number     |
|-------------------|------------------------|------------------------|----------------|
| <b>Pomc</b>       | CGACAGGCAGGAGACTGAAC   | AGATGCGCAGAGAAACGAGG   | NM_007618.3    |
| <b>Pcsk2</b>      | AAGAAGACGCAGCCTACACC   | TTGCCAGTGTTGAACAGGT    | NM_008792.4    |
| <b>Crfr1</b>      | AGGATCAGCAGTGTGAGAGC   | AGCCATTGTTTGTGGTGTGTAG | NM_007762.5    |
| <b>Crhbp</b>      | CAGTTAAAGAAACCTGCGGCT  | TTTCCCACTGGAGACCATGC   | NM_198408.3    |
| <b>Nr3c1 (GR)</b> | AGTGGAAGGACAGCACAATTA  | TACTCCGTTTGCTTGGGGAC   | NM_008173.3    |
| <b>Nr3c2 (MR)</b> | GATGGGTACCCGGTCCTAGA   | GTTGTGTTGCCTTCCACGG    | NM_001083906.1 |
| <b>TBP</b>        | CCTATCACTCCTGCCACACC   | ATGACTGCAGCAAATCGCTTG  | NM_013684.3    |
