# Supplementary material for: Sleep Deprivation Alters the Pituitary Stress Transcriptome in Male and Female Mice
Source: PubMed Central journal article supplement (PMC6794367; doi:10.3389/fendo.2019.00676), 2019-10-09
Supplement: Table_2.pdf [file Table_2.pdf]

Female: PSD Up

| GO_term    | name                                                      | ontology           | pvalue   | FDR      |
|------------|-----------------------------------------------------------|--------------------|----------|----------|
| GO:0007610 | behavior                                                  | biological_process | 9.84E-08 | 0.00011  |
| GO:0043269 | regulation of ion transport                               | biological_process | 4.10E-07 | 0.00023  |
| GO:0050801 | ion homeostasis                                           | biological_process | 5.18E-07 | 0.000247 |
| GO:0098660 | inorganic ion transmembrane transport                     | biological_process | 5.51E-07 | 0.000247 |
| GO:0055080 | cation homeostasis                                        | biological_process | 6.74E-07 | 0.000275 |
| GO:0030003 | cellular cation homeostasis                               | biological_process | 9.35E-07 | 0.000321 |
| GO:0098771 | inorganic ion homeostasis                                 | biological_process | 9.56E-07 | 0.000321 |
| GO:0006873 | cellular ion homeostasis                                  | biological_process | 1.20E-06 | 0.00036  |
| GO:0043270 | positive regulation of ion transport                      | biological_process | 1.28E-06 | 0.00036  |
| GO:0006875 | cellular metal ion homeostasis                            | biological_process | 1.58E-06 | 0.000387 |
| GO:0030001 | metal ion transport                                       | biological_process | 1.72E-06 | 0.000387 |
| GO:0098662 | inorganic cation transmembrane transport                  | biological_process | 2.36E-06 | 0.000504 |
| GO:0023052 | signaling                                                 | biological_process | 2.70E-06 | 0.000551 |
| GO:0006812 | cation transport                                          | biological_process | 2.97E-06 | 0.00058  |
| GO:0055065 | metal ion homeostasis                                     | biological_process | 3.75E-06 | 0.0007   |
| GO:0007626 | locomotory behavior                                       | biological_process | 4.74E-06 | 0.000787 |
| GO:0098655 | cation transmembrane transport                            | biological_process | 5.05E-06 | 0.000809 |
| GO:0051952 | regulation of amine transport                             | biological_process | 6.30E-06 | 0.000914 |
| GO:0030534 | adult behavior                                            | biological_process | 6.32E-06 | 0.000914 |
| GO:0007417 | central nervous system development                        | biological_process | 6.74E-06 | 0.000946 |
| GO:0048878 | chemical homeostasis                                      | biological_process | 7.84E-06 | 0.00107  |
| GO:0034220 | ion transmembrane transport                               | biological_process | 1.08E-05 | 0.00141  |
| GO:0055082 | cellular chemical homeostasis                             | biological_process | 1.13E-05 | 0.00141  |
| GO:0042063 | gliogenesis                                               | biological_process | 1.36E-05 | 0.00163  |
| GO:0030182 | neuron differentiation                                    | biological_process | 1.65E-05 | 0.0019   |
| GO:0044070 | regulation of anion transport                             | biological_process | 1.75E-05 | 0.00197  |
| GO:0043408 | regulation of MAPK cascade                                | biological_process | 2.19E-05 | 0.0022   |
| GO:0048666 | neuron development                                        | biological_process | 2.20E-05 | 0.0022   |
| GO:1903793 | positive regulation of anion transport                    | biological_process | 2.89E-05 | 0.0027   |
| GO:0002028 | regulation of sodium ion transport                        | biological_process | 3.19E-05 | 0.00275  |
| GO:0072503 | cellular divalent inorganic cation homeostasis            | biological_process | 3.33E-05 | 0.00282  |
| GO:0001936 | regulation of endothelial cell proliferation              | biological_process | 4.61E-05 | 0.00376  |
| GO:0050804 | modulation of chemical synaptic transmission              | biological_process | 5.15E-05 | 0.00412  |
| GO:0007267 | cell-cell signaling                                       | biological_process | 5.67E-05 | 0.00438  |
| GO:0055085 | transmembrane transport                                   | biological_process | 5.98E-05 | 0.00455  |
| GO:0072507 | divalent inorganic cation homeostasis                     | biological_process | 6.41E-05 | 0.00467  |
| GO:0032890 | regulation of organic acid transport                      | biological_process | 6.82E-05 | 0.00471  |
| GO:0032892 | positive regulation of organic acid transport             | biological_process | 7.44E-05 | 0.00506  |
| GO:1901628 | positive regulation of postsynaptic membrane organization | biological_process | 7.89E-05 | 0.00528  |
| GO:0051955 | regulation of amino acid transport                        | biological_process | 8.87E-05 | 0.00585  |
| GO:0043410 | positive regulation of MAPK cascade                       | biological_process | 9.56E-05 | 0.00622  |

## Female: PSD Up

|            |                                                       |                    |          |         |
|------------|-------------------------------------------------------|--------------------|----------|---------|
| GO:0042391 | regulation of membrane potential                      | biological_process | 0.000101 | 0.00641 |
| GO:0051480 | regulation of cytosolic calcium ion concentration     | biological_process | 0.000124 | 0.00772 |
| GO:0044057 | regulation of system process                          | biological_process | 0.000144 | 0.0088  |
| GO:0008016 | regulation of heart contraction                       | biological_process | 0.000145 | 0.0088  |
| GO:0060688 | regulation of morphogenesis of a branching structure  | biological_process | 0.000158 | 0.00922 |
| GO:0019725 | cellular homeostasis                                  | biological_process | 0.00016  | 0.00922 |
| GO:0051957 | positive regulation of amino acid transport           | biological_process | 0.000166 | 0.00944 |
| GO:0008015 | blood circulation                                     | biological_process | 0.000199 | 0.0106  |
| GO:0009306 | protein secretion                                     | biological_process | 0.000206 | 0.0107  |
| GO:0010959 | regulation of metal ion transport                     | biological_process | 0.000214 | 0.011   |
| GO:0045161 | neuronal ion channel clustering                       | biological_process | 0.000216 | 0.011   |
| GO:0010001 | glial cell differentiation                            | biological_process | 0.000222 | 0.0112  |
| GO:0051954 | positive regulation of amine transport                | biological_process | 0.000224 | 0.0112  |
| GO:0051093 | negative regulation of developmental process          | biological_process | 0.000229 | 0.0113  |
| GO:0003013 | circulatory system process                            | biological_process | 0.000233 | 0.0113  |
| GO:0071805 | potassium ion transmembrane transport                 | biological_process | 0.000233 | 0.0113  |
| GO:0006874 | cellular calcium ion homeostasis                      | biological_process | 0.000251 | 0.0118  |
| GO:0006813 | potassium ion transport                               | biological_process | 0.000252 | 0.0118  |
| GO:0071804 | cellular potassium ion transport                      | biological_process | 0.000253 | 0.0118  |
| GO:0010963 | regulation of L-arginine import                       | biological_process | 0.000257 | 0.0118  |
| GO:0034230 | enkephalin processing                                 | biological_process | 0.000257 | 0.0118  |
| GO:0008344 | adult locomotory behavior                             | biological_process | 0.000274 | 0.0124  |
| GO:0008284 | positive regulation of cell proliferation             | biological_process | 0.00028  | 0.0126  |
| GO:0019934 | cGMP-mediated signaling                               | biological_process | 0.00032  | 0.0139  |
| GO:1903909 | regulation of receptor clustering                     | biological_process | 0.00032  | 0.0139  |
| GO:0051961 | negative regulation of nervous system development     | biological_process | 0.000338 | 0.0144  |
| GO:0055074 | calcium ion homeostasis                               | biological_process | 0.000351 | 0.0147  |
| GO:0002790 | peptide secretion                                     | biological_process | 0.000445 | 0.018   |
| GO:0034219 | carbohydrate transmembrane transport                  | biological_process | 0.000451 | 0.0181  |
| GO:1905330 | regulation of morphogenesis of an epithelium          | biological_process | 0.000495 | 0.0197  |
| GO:0007612 | learning                                              | biological_process | 0.000502 | 0.0197  |
| GO:0000041 | transition metal ion transport                        | biological_process | 0.000509 | 0.0199  |
| GO:0048812 | neuron projection morphogenesis                       | biological_process | 0.000567 | 0.0214  |
| GO:0007263 | nitric oxide mediated signal transduction             | biological_process | 0.000613 | 0.0225  |
| GO:0033604 | negative regulation of catecholamine secretion        | biological_process | 0.000613 | 0.0225  |
| GO:0050768 | negative regulation of neurogenesis                   | biological_process | 0.000618 | 0.0225  |
| GO:0042551 | neuron maturation                                     | biological_process | 0.000629 | 0.0228  |
| GO:0050678 | regulation of epithelial cell proliferation           | biological_process | 0.00064  | 0.023   |
| GO:0016525 | negative regulation of angiogenesis                   | biological_process | 0.000654 | 0.0232  |
| GO:0120039 | plasma membrane bounded cell projection morphogenesis | biological_process | 0.000656 | 0.0232  |

## Female: PSD Up

|            |                                                                          |                    |          |        |
|------------|--------------------------------------------------------------------------|--------------------|----------|--------|
| GO:0048858 | cell projection morphogenesis                                            | biological_process | 0.000756 | 0.0255 |
| GO:0010958 | regulation of amino acid import                                          | biological_process | 0.000762 | 0.0255 |
| GO:0030070 | insulin processing                                                       | biological_process | 0.000762 | 0.0255 |
| GO:0071673 | positive regulation of smooth muscle cell chemotaxis                     | biological_process | 0.000762 | 0.0255 |
| GO:1901629 | regulation of presynaptic membrane organization                          | biological_process | 0.000762 | 0.0255 |
| GO:2000181 | negative regulation of blood vessel morphogenesis                        | biological_process | 0.000767 | 0.0255 |
| GO:0008217 | regulation of blood pressure                                             | biological_process | 0.000787 | 0.026  |
| GO:0000902 | cell morphogenesis                                                       | biological_process | 0.000807 | 0.0261 |
| GO:0006883 | cellular sodium ion homeostasis                                          | biological_process | 0.000807 | 0.0261 |
| GO:1901626 | regulation of postsynaptic membrane organization                         | biological_process | 0.000807 | 0.0261 |
| GO:0019935 | cyclic-nucleotide-mediated signaling                                     | biological_process | 0.00082  | 0.0263 |
| GO:0031175 | neuron projection development                                            | biological_process | 0.000825 | 0.0263 |
| GO:0006911 | phagocytosis, engulfment                                                 | biological_process | 0.00085  | 0.0267 |
| GO:1903522 | regulation of blood circulation                                          | biological_process | 0.000861 | 0.0268 |
| GO:0070838 | divalent metal ion transport                                             | biological_process | 0.000932 | 0.0285 |
| GO:0072511 | divalent inorganic cation transport                                      | biological_process | 0.000971 | 0.0289 |
| GO:0001937 | negative regulation of endothelial cell proliferation                    | biological_process | 0.00098  | 0.0289 |
| GO:0007618 | mating                                                                   | biological_process | 0.00098  | 0.0289 |
| GO:0048709 | oligodendrocyte differentiation                                          | biological_process | 0.000998 | 0.0291 |
| GO:0035023 | regulation of Rho protein signal transduction                            | biological_process | 0.00101  | 0.0292 |
| GO:0050679 | positive regulation of epithelial cell proliferation                     | biological_process | 0.00108  | 0.0306 |
| GO:1902533 | positive regulation of intracellular signal transduction                 | biological_process | 0.00109  | 0.0308 |
| GO:0022603 | regulation of anatomical structure morphogenesis                         | biological_process | 0.00111  | 0.0309 |
| GO:0046903 | secretion                                                                | biological_process | 0.00111  | 0.0309 |
| GO:1901343 | negative regulation of vasculature development                           | biological_process | 0.00112  | 0.0309 |
| GO:0050663 | cytokine secretion                                                       | biological_process | 0.00112  | 0.0309 |
| GO:0061564 | axon development                                                         | biological_process | 0.00118  | 0.0324 |
| GO:0008285 | negative regulation of cell proliferation                                | biological_process | 0.00122  | 0.0332 |
| GO:0007205 | protein kinase C-activating G-protein coupled receptor signaling pathway | biological_process | 0.0013   | 0.0338 |
| GO:0007638 | mechanosensory behavior                                                  | biological_process | 0.0013   | 0.0338 |
| GO:0010544 | negative regulation of platelet activation                               | biological_process | 0.0013   | 0.0338 |
| GO:0031643 | positive regulation of myelination                                       | biological_process | 0.0013   | 0.0338 |
| GO:0034312 | diol biosynthetic process                                                | biological_process | 0.0013   | 0.0338 |
| GO:0042559 | pteridine-containing compound biosynthetic process                       | biological_process | 0.0013   | 0.0338 |
| GO:0032990 | cell part morphogenesis                                                  | biological_process | 0.00137  | 0.0347 |
| GO:0019233 | sensory perception of pain                                               | biological_process | 0.00144  | 0.0362 |
| GO:0007411 | axon guidance                                                            | biological_process | 0.00144  | 0.0362 |

## Female: PSD Up

|            |                                                                               |                    |         |        |
|------------|-------------------------------------------------------------------------------|--------------------|---------|--------|
| GO:0034380 | high-density lipoprotein particle assembly                                    | biological_process | 0.00151 | 0.0364 |
| GO:1903275 | positive regulation of sodium ion export                                      | biological_process | 0.00151 | 0.0364 |
| GO:1903278 | positive regulation of sodium ion export from cell                            | biological_process | 0.00151 | 0.0364 |
| GO:1904395 | positive regulation of skeletal muscle acetylcholine-gated channel clustering | biological_process | 0.00151 | 0.0364 |
| GO:0097485 | neuron projection guidance                                                    | biological_process | 0.00151 | 0.0364 |
| GO:0007611 | learning or memory                                                            | biological_process | 0.00154 | 0.0368 |
| GO:0010721 | negative regulation of cell development                                       | biological_process | 0.00157 | 0.0371 |
| GO:0035150 | regulation of tube size                                                       | biological_process | 0.0016  | 0.0371 |
| GO:0050880 | regulation of blood vessel size                                               | biological_process | 0.0016  | 0.0371 |
| GO:0061000 | negative regulation of dendritic spine development                            | biological_process | 0.00161 | 0.0371 |
| GO:0006814 | sodium ion transport                                                          | biological_process | 0.00168 | 0.0386 |
| GO:1901342 | regulation of vasculature development                                         | biological_process | 0.00172 | 0.039  |
| GO:0015672 | monovalent inorganic cation transport                                         | biological_process | 0.00179 | 0.0403 |
| GO:0001938 | positive regulation of endothelial cell proliferation                         | biological_process | 0.00185 | 0.0413 |
| GO:0034103 | regulation of tissue remodeling                                               | biological_process | 0.00185 | 0.0413 |
| GO:0042327 | positive regulation of phosphorylation                                        | biological_process | 0.00191 | 0.0424 |
| GO:0010039 | response to iron ion                                                          | biological_process | 0.00196 | 0.0431 |
| GO:0035094 | response to nicotine                                                          | biological_process | 0.00196 | 0.0431 |
| GO:0007409 | axonogenesis                                                                  | biological_process | 0.002   | 0.0437 |
| GO:0007631 | feeding behavior                                                              | biological_process | 0.00201 | 0.0437 |
| GO:0035725 | sodium ion transmembrane transport                                            | biological_process | 0.00206 | 0.0446 |
| GO:2000027 | regulation of organ morphogenesis                                             | biological_process | 0.00218 | 0.0466 |
| GO:0001934 | positive regulation of protein phosphorylation                                | biological_process | 0.00218 | 0.0466 |
| GO:0050680 | negative regulation of epithelial cell proliferation                          | biological_process | 0.00219 | 0.0466 |
| GO:0050433 | regulation of catecholamine secretion                                         | biological_process | 0.00229 | 0.0481 |
| GO:0099024 | plasma membrane invagination                                                  | biological_process | 0.00229 | 0.0481 |
| GO:0030799 | regulation of cyclic nucleotide metabolic process                             | biological_process | 0.0023  | 0.0481 |
| GO:0034311 | diol metabolic process                                                        | biological_process | 0.00235 | 0.0487 |
| GO:0002035 | brain renin-angiotensin system                                                | biological_process | 0.00249 | 0.0487 |
| GO:0015670 | carbon dioxide transport                                                      | biological_process | 0.00249 | 0.0487 |
| GO:0032489 | regulation of Cdc42 protein signal transduction                               | biological_process | 0.00249 | 0.0487 |
| GO:0071671 | regulation of smooth muscle cell chemotaxis                                   | biological_process | 0.00249 | 0.0487 |
| GO:1903273 | regulation of sodium ion export                                               | biological_process | 0.00249 | 0.0487 |
| GO:1903276 | regulation of sodium ion export from cell                                     | biological_process | 0.00249 | 0.0487 |
| GO:1904393 | regulation of skeletal muscle acetylcholine-gated channel clustering          | biological_process | 0.00249 | 0.0487 |
| GO:1904398 | positive regulation of neuromuscular junction development                     | biological_process | 0.00249 | 0.0487 |
| GO:0031644 | regulation of neurological system process                                     | biological_process | 0.00253 | 0.0489 |
| GO:0001505 | regulation of neurotransmitter levels                                         | biological_process | 0.00254 | 0.0489 |

## Female: PSD Up

|            |                                                           |                    |         |        |
|------------|-----------------------------------------------------------|--------------------|---------|--------|
| GO:0050866 | negative regulation of cell activation                    | biological_process | 0.00254 | 0.0489 |
| GO:0010765 | positive regulation of sodium ion transport               | biological_process | 0.00255 | 0.0489 |
| GO:0055078 | sodium ion homeostasis                                    | biological_process | 0.00279 | 0.053  |
| GO:0045765 | regulation of angiogenesis                                | biological_process | 0.00283 | 0.0537 |
| GO:0002027 | regulation of heart rate                                  | biological_process | 0.00293 | 0.055  |
| GO:0045596 | negative regulation of cell differentiation               | biological_process | 0.00294 | 0.055  |
| GO:0032989 | cellular component morphogenesis                          | biological_process | 0.00301 | 0.0561 |
| GO:0050905 | neuromuscular process                                     | biological_process | 0.00308 | 0.0569 |
| GO:0051046 | regulation of secretion                                   | biological_process | 0.00312 | 0.0574 |
| GO:0007162 | negative regulation of cell adhesion                      | biological_process | 0.00316 | 0.0576 |
| GO:0099537 | trans-synaptic signaling                                  | biological_process | 0.00317 | 0.0577 |
| GO:0001990 | regulation of systemic arterial blood pressure by hormone | biological_process | 0.00327 | 0.0583 |
| GO:0051953 | negative regulation of amine transport                    | biological_process | 0.00327 | 0.0583 |
| GO:0099536 | synaptic signaling                                        | biological_process | 0.00337 | 0.0594 |
| GO:0009798 | axis specification                                        | biological_process | 0.00337 | 0.0594 |
| GO:0031099 | regeneration                                              | biological_process | 0.00337 | 0.0594 |
| GO:0050890 | cognition                                                 | biological_process | 0.0034  | 0.0595 |
| GO:0001816 | cytokine production                                       | biological_process | 0.00344 | 0.0598 |
| GO:0045995 | regulation of embryonic development                       | biological_process | 0.00344 | 0.0598 |
| GO:0048167 | regulation of synaptic plasticity                         | biological_process | 0.00351 | 0.0598 |
| GO:1903530 | regulation of secretion by cell                           | biological_process | 0.00353 | 0.0598 |
| GO:0055067 | monovalent inorganic cation homeostasis                   | biological_process | 0.00364 | 0.0598 |
| GO:0006707 | cholesterol catabolic process                             | biological_process | 0.00369 | 0.0598 |
| GO:0010624 | regulation of Schwann cell proliferation                  | biological_process | 0.00369 | 0.0598 |
| GO:0010873 | positive regulation of cholesterol esterification         | biological_process | 0.00369 | 0.0598 |
| GO:0016127 | sterol catabolic process                                  | biological_process | 0.00369 | 0.0598 |
| GO:0032525 | somite rostral/caudal axis specification                  | biological_process | 0.00369 | 0.0598 |
| GO:0033700 | phospholipid efflux                                       | biological_process | 0.00369 | 0.0598 |
| GO:0035428 | hexose transmembrane transport                            | biological_process | 0.00369 | 0.0598 |
| GO:0036376 | sodium ion export from cell                               | biological_process | 0.00369 | 0.0598 |
| GO:0046654 | tetrahydrofolate biosynthetic process                     | biological_process | 0.00369 | 0.0598 |
| GO:1903911 | positive regulation of receptor clustering                | biological_process | 0.00369 | 0.0598 |
| GO:1903961 | positive regulation of anion transmembrane transport      | biological_process | 0.00369 | 0.0598 |
| GO:1905906 | regulation of amyloid fibril formation                    | biological_process | 0.00369 | 0.0598 |
| GO:1905950 | monosaccharide transmembrane transport                    | biological_process | 0.00369 | 0.0598 |
| GO:0046850 | regulation of bone remodeling                             | biological_process | 0.00376 | 0.0604 |
| GO:0061045 | negative regulation of wound healing                      | biological_process | 0.00376 | 0.0604 |
| GO:0031102 | neuron projection regeneration                            | biological_process | 0.00381 | 0.0604 |
| GO:0042417 | dopamine metabolic process                                | biological_process | 0.00381 | 0.0604 |
| GO:0042755 | eating behavior                                           | biological_process | 0.00381 | 0.0604 |
| GO:0046916 | cellular transition metal ion homeostasis                 | biological_process | 0.00386 | 0.061  |
| GO:0070372 | regulation of ERK1 and ERK2 cascade                       | biological_process | 0.00389 | 0.0613 |

Female: PSD Up

|            |                                                                    |                    |         |        |
|------------|--------------------------------------------------------------------|--------------------|---------|--------|
| GO:0008544 | epidermis development                                              | biological_process | 0.00402 | 0.0626 |
| GO:0055123 | digestive system development                                       | biological_process | 0.00404 | 0.0626 |
| GO:0070374 | positive regulation of ERK1 and ERK2 cascade                       | biological_process | 0.00405 | 0.0626 |
| GO:0032940 | secretion by cell                                                  | biological_process | 0.0041  | 0.0629 |
| GO:0010324 | membrane invagination                                              | biological_process | 0.00412 | 0.0629 |
| GO:0019226 | transmission of nerve impulse                                      | biological_process | 0.00412 | 0.0629 |
| GO:0098657 | import into cell                                                   | biological_process | 0.00412 | 0.0629 |
| GO:0003018 | vascular process in circulatory system                             | biological_process | 0.00423 | 0.0643 |
| GO:0055076 | transition metal ion homeostasis                                   | biological_process | 0.00426 | 0.0646 |
| GO:0030195 | negative regulation of blood coagulation                           | biological_process | 0.00439 | 0.0654 |
| GO:0045992 | negative regulation of embryonic development                       | biological_process | 0.00439 | 0.0654 |
| GO:1900047 | negative regulation of hemostasis                                  | biological_process | 0.00439 | 0.0654 |
| GO:0035296 | regulation of tube diameter                                        | biological_process | 0.00496 | 0.0708 |
| GO:0070588 | calcium ion transmembrane transport                                | biological_process | 0.00496 | 0.0708 |
| GO:0097746 | regulation of blood vessel diameter                                | biological_process | 0.00496 | 0.0708 |
| GO:0022404 | molting cycle process                                              | biological_process | 0.00499 | 0.0708 |
| GO:0022405 | hair cycle process                                                 | biological_process | 0.00499 | 0.0708 |
| GO:0050819 | negative regulation of coagulation                                 | biological_process | 0.00502 | 0.0708 |
| GO:0002016 | regulation of blood volume by renin-angiotensin                    | biological_process | 0.00511 | 0.0708 |
| GO:0006729 | tetrahydrobiopterin biosynthetic process                           | biological_process | 0.00511 | 0.0708 |
| GO:0042297 | vocal learning                                                     | biological_process | 0.00511 | 0.0708 |
| GO:0043691 | reverse cholesterol transport                                      | biological_process | 0.00511 | 0.0708 |
| GO:0045916 | negative regulation of complement activation                       | biological_process | 0.00511 | 0.0708 |
| GO:0046146 | tetrahydrobiopterin metabolic process                              | biological_process | 0.00511 | 0.0708 |
| GO:0071436 | sodium ion export                                                  | biological_process | 0.00511 | 0.0708 |
| GO:0098596 | imitative learning                                                 | biological_process | 0.00511 | 0.0708 |
| GO:2000258 | negative regulation of protein activation cascade                  | biological_process | 0.00511 | 0.0708 |
| GO:0120036 | plasma membrane bounded cell projection organization               | biological_process | 0.00515 | 0.0711 |
| GO:0009266 | response to temperature stimulus                                   | biological_process | 0.00521 | 0.0717 |
| GO:0006820 | anion transport                                                    | biological_process | 0.00539 | 0.0738 |
| GO:0014002 | astrocyte development                                              | biological_process | 0.00571 | 0.0773 |
| GO:0031646 | positive regulation of neurological system process                 | biological_process | 0.00571 | 0.0773 |
| GO:0090288 | negative regulation of cellular response to growth factor stimulus | biological_process | 0.00573 | 0.0773 |
| GO:0061024 | membrane organization                                              | biological_process | 0.00574 | 0.0773 |
| GO:0015711 | organic anion transport                                            | biological_process | 0.00577 | 0.0775 |
| GO:0009636 | response to toxic substance                                        | biological_process | 0.00598 | 0.0791 |
| GO:0021782 | glial cell development                                             | biological_process | 0.00598 | 0.0791 |
| GO:0042303 | molting cycle                                                      | biological_process | 0.00598 | 0.0791 |
| GO:0042633 | hair cycle                                                         | biological_process | 0.00598 | 0.0791 |
| GO:0009628 | response to abiotic stimulus                                       | biological_process | 0.00619 | 0.0815 |

Female: PSD Up

|            |                                                                              |                    |          |          |
|------------|------------------------------------------------------------------------------|--------------------|----------|----------|
| GO:0003044 | regulation of systemic arterial blood pressure mediated by a chemical signal | biological_process | 0.00645  | 0.0843   |
| GO:0010817 | regulation of hormone levels                                                 | biological_process | 0.00656  | 0.0843   |
| GO:0032101 | regulation of response to external stimulus                                  | biological_process | 0.00672  | 0.0843   |
| GO:0006563 | L-serine metabolic process                                                   | biological_process | 0.00674  | 0.0843   |
| GO:0007202 | activation of phospholipase C activity                                       | biological_process | 0.00674  | 0.0843   |
| GO:0010872 | regulation of cholesterol esterification                                     | biological_process | 0.00674  | 0.0843   |
| GO:0014052 | regulation of gamma-aminobutyric acid secretion                              | biological_process | 0.00674  | 0.0843   |
| GO:0015669 | gas transport                                                                | biological_process | 0.00674  | 0.0843   |
| GO:0015740 | C4-dicarboxylate transport                                                   | biological_process | 0.00674  | 0.0843   |
| GO:0019755 | one-carbon compound transport                                                | biological_process | 0.00674  | 0.0843   |
| GO:0030007 | cellular potassium ion homeostasis                                           | biological_process | 0.00674  | 0.0843   |
| GO:0042416 | dopamine biosynthetic process                                                | biological_process | 0.00674  | 0.0843   |
| GO:1900221 | regulation of amyloid-beta clearance                                         | biological_process | 0.00674  | 0.0843   |
| GO:1902430 | negative regulation of amyloid-beta formation                                | biological_process | 0.00674  | 0.0843   |
| GO:0010977 | negative regulation of neuron projection development                         | biological_process | 0.00691  | 0.0861   |
| GO:0030004 | cellular monovalent inorganic cation homeostasis                             | biological_process | 0.0071   | 0.0882   |
| GO:0045823 | positive regulation of heart contraction                                     | biological_process | 0.00724  | 0.0892   |
| GO:0070207 | protein homotrimerization                                                    | biological_process | 0.00724  | 0.0892   |
| GO:1902305 | regulation of sodium ion transmembrane transport                             | biological_process | 0.00725  | 0.0892   |
| GO:0009612 | response to mechanical stimulus                                              | biological_process | 0.00756  | 0.0925   |
| GO:0018958 | phenol-containing compound metabolic process                                 | biological_process | 0.0078   | 0.0946   |
| GO:0010038 | response to metal ion                                                        | biological_process | 0.00786  | 0.0951   |
| GO:1903531 | negative regulation of secretion by cell                                     | biological_process | 0.00803  | 0.096    |
| GO:0007268 | chemical synaptic transmission                                               | biological_process | 0.00808  | 0.096    |
| GO:0098916 | anterograde trans-synaptic signaling                                         | biological_process | 0.00808  | 0.096    |
| GO:0010543 | regulation of platelet activation                                            | biological_process | 0.00809  | 0.096    |
| GO:0042311 | vasodilation                                                                 | biological_process | 0.00809  | 0.096    |
| GO:0048546 | digestive tract morphogenesis                                                | biological_process | 0.00809  | 0.096    |
| GO:0050730 | regulation of peptidyl-tyrosine phosphorylation                              | biological_process | 0.00839  | 0.0993   |
| GO:0009396 | folic acid-containing compound biosynthetic process                          | biological_process | 0.00858  | 0.0997   |
| GO:0042428 | serotonin metabolic process                                                  | biological_process | 0.00858  | 0.0997   |
| GO:0071281 | cellular response to iron ion                                                | biological_process | 0.00858  | 0.0997   |
| GO:0098597 | observational learning                                                       | biological_process | 0.00858  | 0.0997   |
| GO:0098598 | learned vocalization behavior or vocal learning                              | biological_process | 0.00858  | 0.0997   |
| GO:1904396 | regulation of neuromuscular junction development                             | biological_process | 0.00858  | 0.0997   |
| GO:0030425 | dendrite                                                                     | cellular_component | 3.74E-07 | 0.00023  |
| GO:0044456 | synapse part                                                                 | cellular_component | 1.00E-06 | 0.000321 |

Female: PSD Up

|            |                                                         |                    |          |          |
|------------|---------------------------------------------------------|--------------------|----------|----------|
| GO:0036477 | somatodendritic compartment                             | cellular_component | 1.64E-06 | 0.000387 |
| GO:0072562 | blood microparticle                                     | cellular_component | 4.31E-06 | 0.000756 |
| GO:0045202 | synapse                                                 | cellular_component | 4.38E-06 | 0.000756 |
| GO:0044297 | cell body                                               | cellular_component | 5.48E-06 | 0.000847 |
| GO:0043025 | neuronal cell body                                      | cellular_component | 2.21E-05 | 0.0022   |
| GO:0098793 | presynapse                                              | cellular_component | 2.33E-05 | 0.00228  |
| GO:0098590 | plasma membrane region                                  | cellular_component | 3.10E-05 | 0.00275  |
| GO:0005901 | caveola                                                 | cellular_component | 3.19E-05 | 0.00275  |
| GO:0099503 | secretory vesicle                                       | cellular_component | 5.63E-05 | 0.00438  |
| GO:0044304 | main axon                                               | cellular_component | 6.49E-05 | 0.00467  |
| GO:0044853 | plasma membrane raft                                    | cellular_component | 9.82E-05 | 0.0063   |
| GO:0098589 | membrane region                                         | cellular_component | 0.000149 | 0.00891  |
| GO:1902495 | transmembrane transporter complex                       | cellular_component | 0.000152 | 0.00896  |
| GO:0030659 | cytoplasmic vesicle membrane                            | cellular_component | 0.000193 | 0.0106   |
| GO:1990351 | transporter complex                                     | cellular_component | 0.000197 | 0.0106   |
| GO:0045121 | membrane raft                                           | cellular_component | 0.000199 | 0.0106   |
| GO:0098857 | membrane microdomain                                    | cellular_component | 0.000199 | 0.0106   |
| GO:0009986 | cell surface                                            | cellular_component | 0.000201 | 0.0106   |
| GO:0097060 | synaptic membrane                                       | cellular_component | 0.000292 | 0.013    |
| GO:0030667 | secretory granule membrane                              | cellular_component | 0.000324 | 0.014    |
| GO:0048471 | perinuclear region of cytoplasm                         | cellular_component | 0.000339 | 0.0144   |
| GO:0031012 | extracellular matrix                                    | cellular_component | 0.000369 | 0.0153   |
| GO:0012506 | vesicle membrane                                        | cellular_component | 0.000528 | 0.0204   |
| GO:0034364 | high-density lipoprotein particle                       | cellular_component | 0.000613 | 0.0225   |
| GO:0008021 | synaptic vesicle                                        | cellular_component | 0.00068  | 0.0238   |
| GO:0034705 | potassium channel complex                               | cellular_component | 0.000709 | 0.0247   |
| GO:0032809 | neuronal cell body membrane                             | cellular_component | 0.00085  | 0.0267   |
| GO:0042734 | presynaptic membrane                                    | cellular_component | 0.000906 | 0.0279   |
| GO:0030141 | secretory granule                                       | cellular_component | 0.000907 | 0.0279   |
| GO:0044298 | cell body membrane                                      | cellular_component | 0.00098  | 0.0289   |
| GO:0034702 | ion channel complex                                     | cellular_component | 0.00105  | 0.0301   |
| GO:0043204 | perikaryon                                              | cellular_component | 0.00128  | 0.0338   |
| GO:0033267 | axon part                                               | cellular_component | 0.00133  | 0.0342   |
| GO:0070382 | exocytic vesicle                                        | cellular_component | 0.00134  | 0.0342   |
| GO:0002080 | acrosomal membrane                                      | cellular_component | 0.00161  | 0.0371   |
| GO:0034703 | cation channel complex                                  | cellular_component | 0.00228  | 0.0481   |
| GO:0031232 | extrinsic component of external side of plasma membrane | cellular_component | 0.00249  | 0.0487   |
| GO:0044433 | cytoplasmic vesicle part                                | cellular_component | 0.0025   | 0.0487   |
| GO:0008076 | voltage-gated potassium channel complex                 | cellular_component | 0.00293  | 0.055    |
| GO:0044291 | cell-cell contact zone                                  | cellular_component | 0.00315  | 0.0576   |
| GO:0034358 | plasma lipoprotein particle                             | cellular_component | 0.00327  | 0.0583   |
| GO:1990777 | lipoprotein particle                                    | cellular_component | 0.00327  | 0.0583   |
| GO:0005890 | sodium:potassium-exchanging ATPase complex              | cellular_component | 0.00369  | 0.0598   |



Female: PSD Up

|            |                                                                |                    |          |          |
|------------|----------------------------------------------------------------|--------------------|----------|----------|
| GO:0043203 | axon hillock                                                   | cellular_component | 0.00369  | 0.0598   |
| GO:0032994 | protein-lipid complex                                          | cellular_component | 0.00439  | 0.0654   |
| GO:0032589 | neuron projection membrane                                     | cellular_component | 0.00449  | 0.0668   |
| GO:0030133 | transport vesicle                                              | cellular_component | 0.00476  | 0.0702   |
| GO:0090533 | cation-transporting ATPase complex                             | cellular_component | 0.00674  | 0.0843   |
| GO:0098533 | ATPase dependent transmembrane transport complex               | cellular_component | 0.00674  | 0.0843   |
| GO:0098794 | postsynapse                                                    | cellular_component | 0.00716  | 0.0888   |
| GO:0098552 | side of membrane                                               | cellular_component | 0.00771  | 0.094    |
| GO:0014704 | intercalated disc                                              | cellular_component | 0.0078   | 0.0946   |
| GO:0046873 | metal ion transmembrane transporter activity                   | molecular_function | 6.41E-09 | 2.88E-05 |
| GO:0022891 | substrate-specific transmembrane transporter activity          | molecular_function | 4.76E-08 | 0.000107 |
| GO:0008324 | cation transmembrane transporter activity                      | molecular_function | 9.61E-08 | 0.00011  |
| GO:0015075 | ion transmembrane transporter activity                         | molecular_function | 1.22E-07 | 0.00011  |
| GO:0022890 | inorganic cation transmembrane transporter activity            | molecular_function | 2.94E-07 | 0.00022  |
| GO:0015081 | sodium ion transmembrane transporter activity                  | molecular_function | 1.59E-06 | 0.000387 |
| GO:0030545 | receptor regulator activity                                    | molecular_function | 1.12E-05 | 0.00141  |
| GO:0048018 | receptor ligand activity                                       | molecular_function | 1.38E-05 | 0.00163  |
| GO:0015077 | monovalent inorganic cation transmembrane transporter activity | molecular_function | 1.95E-05 | 0.00213  |
| GO:0005261 | cation channel activity                                        | molecular_function | 2.13E-05 | 0.0022   |
| GO:0005216 | ion channel activity                                           | molecular_function | 2.57E-05 | 0.00245  |
| GO:0022838 | substrate-specific channel activity                            | molecular_function | 3.05E-05 | 0.00275  |
| GO:0015079 | potassium ion transmembrane transporter activity               | molecular_function | 4.46E-05 | 0.00371  |
| GO:0017147 | Wnt-protein binding                                            | molecular_function | 6.19E-05 | 0.00463  |
| GO:0015267 | channel activity                                               | molecular_function | 6.66E-05 | 0.00467  |
| GO:0022803 | passive transmembrane transporter activity                     | molecular_function | 6.66E-05 | 0.00467  |
| GO:0004867 | serine-type endopeptidase inhibitor activity                   | molecular_function | 0.000377 | 0.0155   |
| GO:0022804 | active transmembrane transporter activity                      | molecular_function | 0.000379 | 0.0155   |
| GO:0001664 | G-protein coupled receptor binding                             | molecular_function | 0.000536 | 0.0205   |
| GO:0015085 | calcium ion transmembrane transporter activity                 | molecular_function | 0.000568 | 0.0214   |
| GO:0072509 | divalent inorganic cation transmembrane transporter activity   | molecular_function | 0.000971 | 0.0289   |
| GO:0005179 | hormone activity                                               | molecular_function | 0.000998 | 0.0291   |
| GO:0005262 | calcium channel activity                                       | molecular_function | 0.00104  | 0.0299   |
| GO:0005184 | neuropeptide hormone activity                                  | molecular_function | 0.0013   | 0.0338   |
| GO:0005509 | calcium ion binding                                            | molecular_function | 0.00134  | 0.0342   |
| GO:0004930 | G-protein coupled receptor activity                            | molecular_function | 0.00146  | 0.0364   |
| GO:0005250 | A-type (transient outward) potassium channel activity          | molecular_function | 0.00151  | 0.0364   |
| GO:0030165 | PDZ domain binding                                             | molecular_function | 0.00151  | 0.0364   |

## Female: PSD Up

|            |                                                                                              |                    |         |        |
|------------|----------------------------------------------------------------------------------------------|--------------------|---------|--------|
| GO:0097110 | scaffold protein binding                                                                     | molecular_function | 0.00157 | 0.0371 |
| GO:0005343 | organic acid:sodium symporter activity                                                       | molecular_function | 0.00161 | 0.0371 |
| GO:0022836 | gated channel activity                                                                       | molecular_function | 0.00172 | 0.039  |
| GO:0004866 | endopeptidase inhibitor activity                                                             | molecular_function | 0.00217 | 0.0466 |
| GO:0030414 | peptidase inhibitor activity                                                                 | molecular_function | 0.00245 | 0.0487 |
| GO:0004865 | protein serine/threonine phosphatase inhibitor activity                                      | molecular_function | 0.00249 | 0.0487 |
| GO:0008199 | ferric iron binding                                                                          | molecular_function | 0.00249 | 0.0487 |
| GO:0031749 | D2 dopamine receptor binding                                                                 | molecular_function | 0.00249 | 0.0487 |
| GO:0022843 | voltage-gated cation channel activity                                                        | molecular_function | 0.0026  | 0.0496 |
| GO:0061135 | endopeptidase regulator activity                                                             | molecular_function | 0.00308 | 0.0569 |
| GO:0050780 | dopamine receptor binding                                                                    | molecular_function | 0.00327 | 0.0583 |
| GO:0019238 | cyclohydrolase activity                                                                      | molecular_function | 0.00369 | 0.0598 |
| GO:0042813 | Wnt-activated receptor activity                                                              | molecular_function | 0.00381 | 0.0604 |
| GO:0005244 | voltage-gated ion channel activity                                                           | molecular_function | 0.00405 | 0.0626 |
| GO:0022832 | voltage-gated channel activity                                                               | molecular_function | 0.00405 | 0.0626 |
| GO:1905030 | voltage-gated ion channel activity involved in regulation of postsynaptic membrane potential | molecular_function | 0.00439 | 0.0654 |
| GO:0005539 | glycosaminoglycan binding                                                                    | molecular_function | 0.00461 | 0.0682 |
| GO:0015179 | L-amino acid transmembrane transporter activity                                              | molecular_function | 0.00489 | 0.0708 |
| GO:0005391 | sodium:potassium-exchanging ATPase activity                                                  | molecular_function | 0.00511 | 0.0708 |
| GO:0008556 | potassium-transporting ATPase activity                                                       | molecular_function | 0.00511 | 0.0708 |
| GO:0031995 | insulin-like growth factor II binding                                                        | molecular_function | 0.00511 | 0.0708 |
| GO:0048406 | nerve growth factor binding                                                                  | molecular_function | 0.00511 | 0.0708 |
| GO:0001540 | amyloid-beta binding                                                                         | molecular_function | 0.00532 | 0.073  |
| GO:0015370 | solute:sodium symporter activity                                                             | molecular_function | 0.00571 | 0.0773 |
| GO:0008083 | growth factor activity                                                                       | molecular_function | 0.00598 | 0.0791 |
| GO:0016810 | hydrolase activity, acting on carbon-nitrogen (but not peptide) bonds                        | molecular_function | 0.00601 | 0.0794 |
| GO:0004089 | carbonate dehydratase activity                                                               | molecular_function | 0.00674 | 0.0843 |
| GO:0005283 | sodium:amino acid symporter activity                                                         | molecular_function | 0.00674 | 0.0843 |
| GO:0015291 | secondary active transmembrane transporter activity                                          | molecular_function | 0.00745 | 0.0914 |
| GO:0015175 | neutral amino acid transmembrane transporter activity                                        | molecular_function | 0.00809 | 0.096  |
| GO:0016595 | glutamate binding                                                                            | molecular_function | 0.00858 | 0.0997 |
