# Supplementary material for: Sleep Deprivation Alters the Pituitary Stress Transcriptome in Male and Female Mice
Source: PubMed Central journal article supplement (PMC6794367; doi:10.3389/fendo.2019.00676), 2019-10-09
Supplement: Table_3.pdf [file Table_3.pdf]

Male: PSD Up

| GO_term    | name                                                                                  | ontology           | pvalue   | FDR     |
|------------|---------------------------------------------------------------------------------------|--------------------|----------|---------|
| GO:0046653 | tetrahydrofolate metabolic process                                                    | biological_process | 1.06E-05 | 0.00514 |
| GO:0006760 | folate-containing compound metabolic process                                          | biological_process | 1.92E-05 | 0.00514 |
| GO:0006730 | one-carbon metabolic process                                                          | biological_process | 2.81E-05 | 0.00514 |
| GO:0006116 | NADH oxidation                                                                        | biological_process | 3.08E-05 | 0.00514 |
| GO:0042558 | pteridine-containing compound metabolic process                                       | biological_process | 3.53E-05 | 0.00523 |
| GO:0009256 | 10-formyltetrahydrofolate metabolic process                                           | biological_process | 5.13E-05 | 0.00685 |
| GO:0055114 | oxidation-reduction process                                                           | biological_process | 9.49E-05 | 0.0106  |
| GO:0006732 | coenzyme metabolic process                                                            | biological_process | 0.000105 | 0.0107  |
| GO:0051186 | cofactor metabolic process                                                            | biological_process | 0.000297 | 0.0283  |
| GO:0097284 | hepatocyte apoptotic process                                                          | biological_process | 0.000335 | 0.0298  |
| GO:0043648 | dicarboxylic acid metabolic process                                                   | biological_process | 0.000649 | 0.0542  |
| GO:0006734 | NADH metabolic process                                                                | biological_process | 0.00086  | 0.0675  |
| GO:0015711 | organic anion transport                                                               | biological_process | 0.00119  | 0.0788  |
| GO:1904019 | epithelial cell apoptotic process                                                     | biological_process | 0.00138  | 0.0788  |
| GO:0061041 | regulation of wound healing                                                           | biological_process | 0.00142  | 0.0788  |
| GO:0006911 | phagocytosis, engulfment                                                              | biological_process | 0.00174  | 0.0788  |
| GO:0055086 | nucleobase-containing small molecule metabolic process                                | biological_process | 0.00177  | 0.0788  |
| GO:0009635 | response to herbicide                                                                 | biological_process | 0.0023   | 0.0788  |
| GO:0015794 | glycerol-3-phosphate transport                                                        | biological_process | 0.0023   | 0.0788  |
| GO:0015942 | formate metabolic process                                                             | biological_process | 0.0023   | 0.0788  |
| GO:0034127 | regulation of MyD88-independent toll-like receptor signaling pathway                  | biological_process | 0.0023   | 0.0788  |
| GO:0097017 | renal protein absorption                                                              | biological_process | 0.0023   | 0.0788  |
| GO:0099082 | retrograde trans-synaptic signaling by neuropeptide                                   | biological_process | 0.0023   | 0.0788  |
| GO:0099083 | retrograde trans-synaptic signaling by neuropeptide, modulating synaptic transmission | biological_process | 0.0023   | 0.0788  |
| GO:1903906 | regulation of plasma membrane raft polarization                                       | biological_process | 0.0023   | 0.0788  |
| GO:1904674 | positive regulation of somatic stem cell population maintenance                       | biological_process | 0.0023   | 0.0788  |
| GO:1904675 | regulation of somatic stem cell division                                              | biological_process | 0.0023   | 0.0788  |
| GO:1904677 | positive regulation of somatic stem cell division                                     | biological_process | 0.0023   | 0.0788  |
| GO:2000101 | regulation of mammary stem cell proliferation                                         | biological_process | 0.0023   | 0.0788  |
| GO:2000103 | positive regulation of mammary stem cell proliferation                                | biological_process | 0.0023   | 0.0788  |
| GO:0019674 | NAD metabolic process                                                                 | biological_process | 0.00245  | 0.0817  |
| GO:0006575 | cellular modified amino acid metabolic process                                        | biological_process | 0.00262  | 0.0819  |
| GO:1903034 | regulation of response to wounding                                                    | biological_process | 0.00287  | 0.0819  |
| GO:0099024 | plasma membrane invagination                                                          | biological_process | 0.00292  | 0.0819  |
| GO:0046717 | acid secretion                                                                        | biological_process | 0.00344  | 0.0819  |
| GO:0006820 | anion transport                                                                       | biological_process | 0.00368  | 0.0819  |
| GO:0010324 | membrane invagination                                                                 | biological_process | 0.00399  | 0.0819  |
| GO:0015849 | organic acid transport                                                                | biological_process | 0.00446  | 0.0819  |

## Male: PSD Up

|            |                                                                                       |                    |          |         |
|------------|---------------------------------------------------------------------------------------|--------------------|----------|---------|
| GO:0046942 | carboxylic acid transport                                                             | biological_process | 0.00446  | 0.0819  |
| GO:0006127 | glycerophosphate shuttle                                                              | biological_process | 0.0046   | 0.0819  |
| GO:0009257 | 10-formyltetrahydrofolate biosynthetic process                                        | biological_process | 0.0046   | 0.0819  |
| GO:0009258 | 10-formyltetrahydrofolate catabolic process                                           | biological_process | 0.0046   | 0.0819  |
| GO:0009397 | folic acid-containing compound catabolic process                                      | biological_process | 0.0046   | 0.0819  |
| GO:0014891 | striated muscle atrophy                                                               | biological_process | 0.0046   | 0.0819  |
| GO:0015688 | iron chelate transport                                                                | biological_process | 0.0046   | 0.0819  |
| GO:0015819 | lysine transport                                                                      | biological_process | 0.0046   | 0.0819  |
| GO:0015891 | siderophore transport                                                                 | biological_process | 0.0046   | 0.0819  |
| GO:0032607 | interferon-alpha production                                                           | biological_process | 0.0046   | 0.0819  |
| GO:0034124 | regulation of MyD88-dependent toll-like receptor signaling pathway                    | biological_process | 0.0046   | 0.0819  |
| GO:0042560 | pteridine-containing compound catabolic process                                       | biological_process | 0.0046   | 0.0819  |
| GO:0051754 | meiotic sister chromatid cohesion, centromeric                                        | biological_process | 0.0046   | 0.0819  |
| GO:0061193 | taste bud development                                                                 | biological_process | 0.0046   | 0.0819  |
| GO:0099538 | synaptic signaling via neuropeptide                                                   | biological_process | 0.0046   | 0.0819  |
| GO:0099540 | trans-synaptic signaling by neuropeptide                                              | biological_process | 0.0046   | 0.0819  |
| GO:0099551 | trans-synaptic signaling by neuropeptide, modulating synaptic transmission            | biological_process | 0.0046   | 0.0819  |
| GO:1903921 | regulation of protein processing in phagocytic vesicle                                | biological_process | 0.0046   | 0.0819  |
| GO:1903923 | positive regulation of protein processing in phagocytic vesicle                       | biological_process | 0.0046   | 0.0819  |
| GO:1904672 | regulation of somatic stem cell population maintenance                                | biological_process | 0.0046   | 0.0819  |
| GO:0003012 | muscle system process                                                                 | biological_process | 0.00481  | 0.0845  |
| GO:0002190 | cap-independent translational initiation                                              | biological_process | 0.00689  | 0.0968  |
| GO:0002192 | IRES-dependent translational initiation of linear mRNA                                | biological_process | 0.00689  | 0.0968  |
| GO:0007412 | axon target recognition                                                               | biological_process | 0.00689  | 0.0968  |
| GO:0032608 | interferon-beta production                                                            | biological_process | 0.00689  | 0.0968  |
| GO:0051599 | response to hydrostatic pressure                                                      | biological_process | 0.00689  | 0.0968  |
| GO:0070601 | centromeric sister chromatid cohesion                                                 | biological_process | 0.00689  | 0.0968  |
| GO:0098917 | retrograde trans-synaptic signaling                                                   | biological_process | 0.00689  | 0.0968  |
| GO:0110017 | cap-independent translational initiation of linear mRNA                               | biological_process | 0.00689  | 0.0968  |
| GO:1902174 | positive regulation of keratinocyte apoptotic process                                 | biological_process | 0.00689  | 0.0968  |
| GO:1903903 | regulation of establishment of T cell polarity                                        | biological_process | 0.00689  | 0.0968  |
| GO:0016646 | oxidoreductase activity, acting on the CH-NH group of donors, NAD or NADP as acceptor | molecular_function | 7.45E-06 | 0.00514 |
| GO:0016645 | oxidoreductase activity, acting on the CH-NH group of donors                          | molecular_function | 2.49E-05 | 0.00514 |
| GO:0004477 | methenyltetrahydrofolate cyclohydrolase activity                                      | molecular_function | 3.08E-05 | 0.00514 |
| GO:0004488 | methylenetetrahydrofolate dehydrogenase (NADP+) activity                              | molecular_function | 3.08E-05 | 0.00514 |
| GO:0019238 | cyclohydrolase activity                                                               | molecular_function | 7.68E-05 | 0.00933 |

Male: PSD Up

|            |                                                                                           |                    |         |        |
|------------|-------------------------------------------------------------------------------------------|--------------------|---------|--------|
| GO:0016814 | hydrolase activity, acting on carbon-nitrogen (but not peptide) bonds, in cyclic amidines | molecular_function | 0.00126 | 0.0788 |
| GO:0004648 | O-phospho-L-serine:2-oxoglutarate aminotransferase activity                               | molecular_function | 0.0023  | 0.0788 |
| GO:0015169 | glycerol-3-phosphate transmembrane transporter activity                                   | molecular_function | 0.0023  | 0.0788 |
| GO:0031710 | neuromedin B receptor binding                                                             | molecular_function | 0.0023  | 0.0788 |
| GO:0004867 | serine-type endopeptidase inhibitor activity                                              | molecular_function | 0.00362 | 0.0819 |
| GO:0004329 | formate-tetrahydrofolate ligase activity                                                  | molecular_function | 0.0046  | 0.0819 |
| GO:0004611 | phosphoenolpyruvate carboxykinase activity                                                | molecular_function | 0.0046  | 0.0819 |
| GO:0004613 | phosphoenolpyruvate carboxykinase (GTP) activity                                          | molecular_function | 0.0046  | 0.0819 |
| GO:0005169 | neurotrophin TRKB receptor binding                                                        | molecular_function | 0.0046  | 0.0819 |
| GO:0016155 | formyltetrahydrofolate dehydrogenase activity                                             | molecular_function | 0.0046  | 0.0819 |
| GO:0031705 | bombesin receptor binding                                                                 | molecular_function | 0.0046  | 0.0819 |
| GO:0045159 | myosin II binding                                                                         | molecular_function | 0.0046  | 0.0819 |
| GO:0000064 | L-ornithine transmembrane transporter activity                                            | molecular_function | 0.00689 | 0.0968 |
| GO:0004487 | methylenetetrahydrofolate dehydrogenase (NAD+) activity                                   | molecular_function | 0.00689 | 0.0968 |
| GO:0005219 | ryanodine-sensitive calcium-release channel activity                                      | molecular_function | 0.00689 | 0.0968 |
| GO:0015119 | hexose phosphate transmembrane transporter activity                                       | molecular_function | 0.00689 | 0.0968 |
| GO:0015166 | polyol transmembrane transporter activity                                                 | molecular_function | 0.00689 | 0.0968 |
| GO:0015315 | organophosphate:inorganic phosphate antiporter activity                                   | molecular_function | 0.00689 | 0.0968 |
| GO:0015526 | hexose-phosphate:inorganic phosphate antiporter activity                                  | molecular_function | 0.00689 | 0.0968 |
| GO:0015665 | alcohol transmembrane transporter activity                                                | molecular_function | 0.00689 | 0.0968 |
| GO:0061513 | glucose 6-phosphate:inorganic phosphate antiporter activity                               | molecular_function | 0.00689 | 0.0968 |
