# Supplementary material for: Sleep Deprivation Alters the Pituitary Stress Transcriptome in Male and Female Mice
Source: PubMed Central journal article supplement (PMC6794367; doi:10.3389/fendo.2019.00676), 2019-10-09
Supplement: Table_4.pdf [file Table_4.pdf]

Male: PSD Down

| GO_term    | name                                                                                      | ontology           | pvalue   | FDR      |
|------------|-------------------------------------------------------------------------------------------|--------------------|----------|----------|
| GO:0019886 | antigen processing and presentation of exogenous peptide antigen via MHC class II         | biological_process | 2.09E-08 | 6.71E-06 |
| GO:0002495 | antigen processing and presentation of peptide antigen via MHC class II                   | biological_process | 2.92E-08 | 6.71E-06 |
| GO:0002504 | antigen processing and presentation of peptide or polysaccharide antigen via MHC class II | biological_process | 2.92E-08 | 6.71E-06 |
| GO:0048002 | antigen processing and presentation of peptide antigen                                    | biological_process | 3.49E-08 | 6.71E-06 |
| GO:0002478 | antigen processing and presentation of exogenous peptide antigen                          | biological_process | 1.40E-07 | 1.91E-05 |
| GO:0019884 | antigen processing and presentation of exogenous antigen                                  | biological_process | 3.61E-07 | 4.02E-05 |
| GO:0019882 | antigen processing and presentation                                                       | biological_process | 3.77E-07 | 4.02E-05 |
| GO:0034341 | response to interferon-gamma                                                              | biological_process | 6.82E-06 | 0.000655 |
| GO:0002579 | positive regulation of antigen processing and presentation                                | biological_process | 0.00016  | 0.0139   |
| GO:0050670 | regulation of lymphocyte proliferation                                                    | biological_process | 0.000295 | 0.0211   |
| GO:0002577 | regulation of antigen processing and presentation                                         | biological_process | 0.000312 | 0.0211   |
| GO:0032944 | regulation of mononuclear cell proliferation                                              | biological_process | 0.000312 | 0.0211   |
| GO:0070663 | regulation of leukocyte proliferation                                                     | biological_process | 0.000359 | 0.0211   |
| GO:0022409 | positive regulation of cell-cell adhesion                                                 | biological_process | 0.000368 | 0.0211   |
| GO:0033194 | response to hydroperoxide                                                                 | biological_process | 0.000374 | 0.0211   |
| GO:0050868 | negative regulation of T cell activation                                                  | biological_process | 0.00057  | 0.0304   |
| GO:0051251 | positive regulation of lymphocyte activation                                              | biological_process | 0.000682 | 0.0345   |
| GO:1903038 | negative regulation of leukocyte cell-cell adhesion                                       | biological_process | 0.000762 | 0.0349   |
| GO:0002696 | positive regulation of leukocyte activation                                               | biological_process | 0.00106  | 0.0444   |
| GO:0034097 | response to cytokine                                                                      | biological_process | 0.00122  | 0.049    |
| GO:0051250 | negative regulation of lymphocyte activation                                              | biological_process | 0.0013   | 0.0494   |
| GO:0050867 | positive regulation of cell activation                                                    | biological_process | 0.00134  | 0.0494   |
| GO:0002695 | negative regulation of leukocyte activation                                               | biological_process | 0.00182  | 0.0535   |
| GO:0030890 | positive regulation of B cell proliferation                                               | biological_process | 0.0024   | 0.0535   |
| GO:0002343 | peripheral B cell selection                                                               | biological_process | 0.00243  | 0.0535   |
| GO:0002344 | B cell affinity maturation                                                                | biological_process | 0.00243  | 0.0535   |
| GO:0035691 | macrophage migration inhibitory factor signaling pathway                                  | biological_process | 0.00243  | 0.0535   |
| GO:0048866 | stem cell fate specification                                                              | biological_process | 0.00243  | 0.0535   |
| GO:1904323 | regulation of inhibitory G-protein coupled receptor phosphorylation                       | biological_process | 0.00243  | 0.0535   |
| GO:1904325 | positive regulation of inhibitory G-protein coupled receptor phosphorylation              | biological_process | 0.00243  | 0.0535   |
| GO:1990227 | paranodal junction maintenance                                                            | biological_process | 0.00243  | 0.0535   |
| GO:0022408 | negative regulation of cell-cell adhesion                                                 | biological_process | 0.00245  | 0.0535   |
| GO:0050870 | positive regulation of T cell activation                                                  | biological_process | 0.00245  | 0.0535   |
| GO:0050866 | negative regulation of cell activation                                                    | biological_process | 0.00271  | 0.0557   |
| GO:1903039 | positive regulation of leukocyte cell-cell adhesion                                       | biological_process | 0.00285  | 0.0557   |
| GO:0071346 | cellular response to interferon-gamma                                                     | biological_process | 0.00325  | 0.0624   |

## Male: PSD Down

|            |                                                          |                    |          |          |
|------------|----------------------------------------------------------|--------------------|----------|----------|
| GO:0051249 | regulation of lymphocyte activation                      | biological_process | 0.00363  | 0.068    |
| GO:0022407 | regulation of cell-cell adhesion                         | biological_process | 0.00368  | 0.068    |
| GO:0042130 | negative regulation of T cell proliferation              | biological_process | 0.00403  | 0.0729   |
| GO:0045785 | positive regulation of cell adhesion                     | biological_process | 0.00426  | 0.0744   |
| GO:0030888 | regulation of B cell proliferation                       | biological_process | 0.00466  | 0.0777   |
| GO:0034769 | basement membrane disassembly                            | biological_process | 0.00485  | 0.0777   |
| GO:0060214 | endocardium formation                                    | biological_process | 0.00485  | 0.0777   |
| GO:0002683 | negative regulation of immune system process             | biological_process | 0.00533  | 0.084    |
| GO:0045087 | innate immune response                                   | biological_process | 0.00553  | 0.0843   |
| GO:0016064 | immunoglobulin mediated immune response                  | biological_process | 0.0058   | 0.0844   |
| GO:0032945 | negative regulation of mononuclear cell proliferation    | biological_process | 0.0058   | 0.0844   |
| GO:0050672 | negative regulation of lymphocyte proliferation          | biological_process | 0.0058   | 0.0844   |
| GO:0002694 | regulation of leukocyte activation                       | biological_process | 0.00629  | 0.0875   |
| GO:0019724 | B cell mediated immunity                                 | biological_process | 0.00629  | 0.0875   |
| GO:0070664 | negative regulation of leukocyte proliferation           | biological_process | 0.00654  | 0.0898   |
| GO:0030098 | lymphocyte differentiation                               | biological_process | 0.0067   | 0.0907   |
| GO:0002339 | B cell selection                                         | biological_process | 0.00727  | 0.0943   |
| GO:0042613 | MHC class II protein complex                             | cellular_component | 1.03E-09 | 9.91E-07 |
| GO:0042611 | MHC protein complex                                      | cellular_component | 8.85E-08 | 1.42E-05 |
| GO:0098797 | plasma membrane protein complex                          | cellular_component | 0.000762 | 0.0349   |
| GO:0005771 | multivesicular body                                      | cellular_component | 0.00167  | 0.0535   |
| GO:0035693 | NOS2-CD74 complex                                        | cellular_component | 0.00243  | 0.0535   |
| GO:0000323 | lytic vacuole                                            | cellular_component | 0.00282  | 0.0557   |
| GO:0005764 | lysosome                                                 | cellular_component | 0.00282  | 0.0557   |
| GO:0035692 | macrophage migration inhibitory factor receptor complex  | cellular_component | 0.00485  | 0.0777   |
| GO:0005773 | vacuole                                                  | cellular_component | 0.00546  | 0.0843   |
| GO:0005770 | late endosome                                            | cellular_component | 0.00592  | 0.0848   |
| GO:0002142 | stereocilia ankle link complex                           | cellular_component | 0.00727  | 0.0943   |
| GO:1990696 | USH2 complex                                             | cellular_component | 0.00727  | 0.0943   |
| GO:0042605 | peptide antigen binding                                  | molecular_function | 0.000958 | 0.0418   |
| GO:0001968 | fibronectin binding                                      | molecular_function | 0.00153  | 0.0535   |
| GO:0003953 | NAD+ nucleosidase activity                               | molecular_function | 0.00243  | 0.0535   |
| GO:0042658 | MHC class II protein binding, via antigen binding groove | molecular_function | 0.00243  | 0.0535   |
| GO:0050135 | NAD(P)+ nucleosidase activity                            | molecular_function | 0.00243  | 0.0535   |
| GO:0061809 | NAD+ nucleotidase, cyclic ADP-ribose generating          | molecular_function | 0.00243  | 0.0535   |
| GO:0003823 | antigen binding                                          | molecular_function | 0.00272  | 0.0557   |
| GO:0046982 | protein heterodimerization activity                      | molecular_function | 0.00422  | 0.0744   |
| GO:0035718 | macrophage migration inhibitory factor binding           | molecular_function | 0.00485  | 0.0777   |
